# Supplementary material
Source: publisher figshare collection journal article supplement (https://acs.figshare.com/ndownloader/files/4424155)

**Stereoselective Synthesis of 1,2,3,4-Tetrasubstituted Dienes  
from Allenates and Aldehydes: An Observation of  
Phosphine-Induced Chemoselectivity**

Silong Xu, Wen Zou, Guiping Wu, Haibin Song, Zhengjie He\*

*The State Key Laboratory of Elemento-Organic Chemistry and Department of  
Chemistry, Nankai University, 94 Weijin Road, Tianjin 300071, P. R. China*

|                                                                                                           |    |
|-----------------------------------------------------------------------------------------------------------|----|
| I. General Remarks .....                                                                                  | 2  |
| II. Preparation of Allenates .....                                                                        | 2  |
| III. General Procedure for the Phosphine-Mediated Olefination.....                                        | 3  |
| IV. Analytical Data for Compounds <b>3</b> , <b>4</b> and <b>5</b> .....                                  | 4  |
| V. X-ray Crystallographic Data for <b>4b</b> and <b>4k</b> .....                                          | 17 |
| VI. Mechanistic Study .....                                                                               | 19 |
| VII. <sup>1</sup> H and <sup>13</sup> C NMR Spectra of <b>1e</b> , <b>3</b> , <b>4</b> and <b>5</b> ..... | 22 |
| VIII. NOESY Spectrum of <b>4a</b> .....                                                                   | 76 |

## I. General Remarks

Unless otherwise noted, all reactions were carried out in nitrogen atmosphere. Liquid aldehydes were redistilled prior to use. Other reagents from commercial sources were used without further purification.  $^1\text{H}$  and  $^{13}\text{C}$  NMR spectra were recorded on a Bruker AV 400 spectrometer in  $\text{CDCl}_3$  with tetramethylsilane (TMS) as the internal standard. NOESY spectra were obtained on a Variant 300 spectrometer in  $\text{CDCl}_3$ . Melting points were measured on a RY-I apparatus and uncorrected. High resolution ESI mass spectra were acquired with IonSpec QFT-ESI instrument. X-ray crystal diffraction data were collected on a Nonius Kappa CCD diffractometer with Mo  $\text{K}\alpha$  radiation ( $\lambda = 0.7107 \text{ \AA}$ ) at room temperature. Column chromatography was performed on silica gel (200-300 mesh) using a mixture of petroleum ether/ethyl acetate as eluant.

## II. Preparation of Allenates

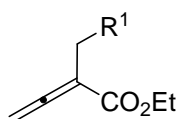

Diethyl 2-vinylidenesuccinate ( $\text{R}^1 = \text{CO}_2\text{Et}$ , **1a**),<sup>1</sup> ethyl 2-(cyanomethyl) buta-2,3-dienoate ( $\text{R}^1 = \text{CN}$ , **1b**),<sup>2</sup> ethyl 2-benzylbuta-2,3-dienoate ( $\text{R}^1 = \text{Ph}$ , **1c**),<sup>3</sup> (*E*)-ethyl 5-phenyl-2-vinylidenepent-4-enoate ( $\text{R}^1 = E\text{-C}_6\text{H}_4\text{-CH=CH}$ , **1d**),<sup>3</sup> ethyl 2-methylbuta-2,3-dienoate ( $\text{R}^1 = \text{H}$ , **1f**)<sup>3</sup> are known compounds and prepared according to the literatures.

---

<sup>1</sup> H. Guo, Q. Xu, O. Kwon, *J. Am. Chem. Soc.* **2009**, *131*, 6318.

<sup>2</sup> Xu, S.; Zhou, L.; Ma, R.; Song, H.; He, Z. *Org. Lett.* **2010**, *12*, 544-547.

<sup>3</sup> Tran, Y. S.; Kwon, O. *J. Am. Chem. Soc.* **2007**, *129*, 12632..

## Synthesis of ethyl 2-vinylidenehexanoate<sup>4</sup>

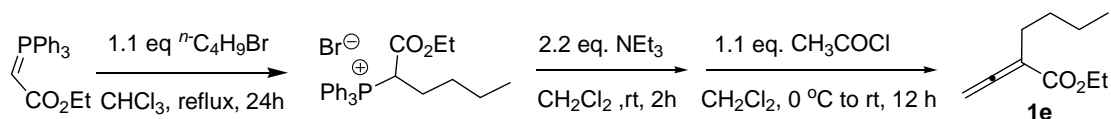

To a stirred solution of (carbethoxymethylene)triphenylphosphorane (17.43 g, 50 mmol) in chloroform (50 mL) was added 1.1 equivalent of 1-bromobutane (7.54 g, 55 mmol) at room temperature. The reaction mixture was refluxed for 24 h. Then the solvent and the excess of 1-bromobutane were evaporated under reduced pressure. To the resulting phosphonium salt was added anhydrous dichloromethane (200 mL) and 2.2 equivalent of triethylamine (11.11 g, 110 mmol). After stirred for 2 h, a solution of 1.1 equivalent of acetyl chloride (4.29 g, 55 mmol) in dichloromethane (50 mL) was dropwise added over 1 h at 0 °C. Then the reaction mixture was allowed to warm up to room temperature and stirred for another 12 h. Most of the solvent was carefully distilled off, and the residue was thoroughly extracted with petroleum ether (bp 30-60 °C, 5 × 100 mL). The combined extracting was concentrated and the residue was subjected to column chromatography on silica gel (eluant: 5% EtOAc in petroleum ether) to provide allenolate **1e** as colorless oil (4.32 g, 51% yield). <sup>1</sup>H NMR (CDCl<sub>3</sub>, 400 MHz, TMS): δ 5.12 (t, *J* = 2.8 Hz, 2H), 4.21 (q, *J* = 7.1 Hz, 2H), 2.23 (m, 2H), 1.49-1.31 (m, 4H), 1.29 (t, *J* = 7.1 Hz), 0.91 (t, *J* = 7.1 Hz).; <sup>13</sup>C NMR (CDCl<sub>3</sub>, 100 MHz, TMS): δ 213.7, 167.4, 100.4, 78.8, 60.9, 30.0, 27.7, 22.2, 14.2, 13.9; HRMS calcd for C<sub>10</sub>H<sub>16</sub>O<sub>2</sub>Na<sup>+</sup> requires 192.1043, found 192.1049.

### III. General Procedure for the Phosphine-Mediated Olefination

Under N<sub>2</sub> atmosphere and at room temperature, to a stirred solution of allenolate **1** (0.2 mmol) and aldehyde **2** (0.3 mmol) in CHCl<sub>3</sub> (5 mL) in a Schlenk tube (25 mL) was added the liquid phosphine (0.3 mmol) by the means of a microsyringe. The resulting reaction mixture was stirred till the aldehyde **2** was completely consumed, as

<sup>4</sup> **1e** was reported without being fully characterized: Maity, P.; Lepore, S. D. *J. Org. Chem.* **2009**, *74*, 158–162.

monitored by TLC. The solvent was removed under reduced pressure and the residue was purified by column chromatography on silica gel (gradient eluant: petroleum ether/ethyl acetate 20:1–5:1) to afford dienes **4**.

#### IV. Analytical Data for Compounds **3**<sup>5</sup>, **4** and **5**

**Table 2, entry 1.** Following the general procedure, the reaction of allenolate **1a** (60 mg, 0.3 mmol), benzaldehyde (21 mg, 0.2 mmol) and PBu<sub>3</sub> (75  $\mu$ L, 0.3 mmol) was performed for 24 h.

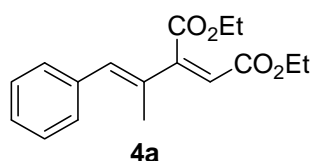

**4a:** 96% yield (obtained as an inseparable mixture in 99% combined yield with a trace amount of cyclopropane (*trans,Z*)-**3a**), as colorless oil; <sup>1</sup>H NMR (CDCl<sub>3</sub>, 400 MHz, TMS):  $\delta$  7.37 (m, 2H), 7.28 (m, 3H), 6.79 (s, 1H), 6.00 (s, 1H), 4.44 (q, *J* = 7.2 Hz, 2H), 4.22 (q, *J* = 7.1 Hz, 2H), 2.06 (d, *J* = 1.0 Hz, 3H), 1.40 (t, *J* = 7.2 Hz, 3H), 1.30 (t, *J* = 7.1 Hz, 3H); <sup>13</sup>C NMR (CDCl<sub>3</sub>, 100 MHz, TMS):  $\delta$  168.4, 165.3, 151.7, 136.4, 136.3, 131.9, 129.5, 128.2, 127.9, 116.2, 61.8, 60.7, 14.7, 14.2, 14.0; HRMS (ESI) calcd for C<sub>17</sub>H<sub>20</sub>O<sub>4</sub>Na<sup>+</sup> requires 311.1254, found 311.1250.

**Table 2, entry 2.** Following the general procedure, the reaction of allenolate **1a** (60 mg, 0.3 mmol), 4-methylbenzaldehyde (24 mg, 0.2 mmol) and PBu<sub>3</sub> (75  $\mu$ L, 0.3 mmol) was performed for 24 h.

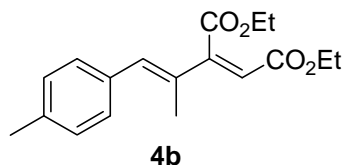

**4b:** 85% yield (obtained as an inseparable mixture in 88% combined yield with a trace amount of cyclopropane (*trans,Z*)-**3b**), as a white solid, mp 79-81 °C; <sup>1</sup>H NMR

<sup>5</sup> Analytical data for **3a-d**, **3f**, **3g**, **3i-l** were reported: Xu, S.; Zhou, L.; Ma, R.; Song, H.; He, Z. *Org. Lett.* **2010**, *12*, 544-547.

(CDCl<sub>3</sub>, 400 MHz, TMS):  $\delta$  7.20 (d,  $J$  = 8.5 Hz, 2H), 7.17 (d,  $J$  = 8.5 Hz, 2H), 6.76 (s, 1H), 5.98 (s, 1H), 4.43 (q,  $J$  = 7.1 Hz, 2H), 4.22 (q,  $J$  = 7.1 Hz, 2H), 2.36 (s, 3H), 2.06 (s, 3H), 1.38 (t,  $J$  = 7.2 Hz, 3H), 1.30 (t,  $J$  = 7.1 Hz, 3H); <sup>13</sup>C NMR (CDCl<sub>3</sub>, 100 MHz, TMS):  $\delta$  168.4, 165.3, 151.9, 137.9, 136.5, 133.5, 131.2, 129.5, 129.0, 115.7, 61.7, 60.7, 21.2, 14.7, 14.2, 14.0; HRMS calcd for C<sub>18</sub>H<sub>22</sub>O<sub>4</sub>Na<sup>+</sup> requires 325.1410, found 325.1405.

**Table 2, entry 3.** Following the general procedure, the reaction of allenoate **1a** (60 mg, 0.3 mmol), 4-methoxybenzaldehyde (27 mg, 0.2 mmol) and PBu<sub>3</sub> (75  $\mu$ L, 0.3 mmol) was performed for 24 h.

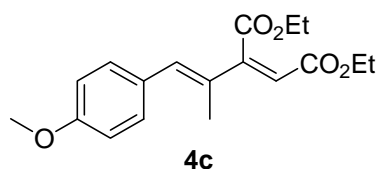

**4c:** 87% yield, as a white solid, mp 50-52 °C; <sup>1</sup>H NMR (CDCl<sub>3</sub>, 400 MHz, TMS):  $\delta$  7.26 (d,  $J$  = 8.5 Hz, 2H), 6.90 (d,  $J$  = 8.6 Hz, 2H), 6.73 (s, 1H), 5.96 (s, 1H), 4.44 (q,  $J$  = 7.1 Hz, 2H), 4.22 (q,  $J$  = 7.1 Hz, 2H), 3.83 (s, 3H), 2.07 (s, 3H), 1.40 (t,  $J$  = 7.1 Hz, 3H), 1.30 (t,  $J$  = 7.1 Hz, 3H); <sup>13</sup>C NMR (CDCl<sub>3</sub>, 100 MHz, TMS):  $\delta$  168.6, 165.4, 159.3, 152.1, 136.3, 131.1, 130.2, 128.8, 115.3, 113.7, 61.7, 60.7, 55.3, 14.7, 14.2, 14.0; HRMS calcd for C<sub>18</sub>H<sub>22</sub>O<sub>5</sub>Na<sup>+</sup> requires 341.1359, found 341.1355.

**Table 2, entry 5.** Following the general procedure, the reaction of allenoate **1a** (60 mg, 0.3 mmol), 2-hydroxybenzaldehyde (25 mg, 0.2 mmol) and PBu<sub>3</sub> (75  $\mu$ L, 0.3 mmol) was performed for 1 h.

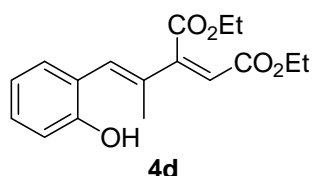

**4d:** 72% yield, as a white solid, mp 137-138 °C; <sup>1</sup>H NMR (CDCl<sub>3</sub>, 400 MHz, TMS):  $\delta$  7.19 (t,  $J$  = 7.7 Hz, 1H), 7.14 (d,  $J$  = 7.5 Hz, 1H), 6.90 (m, 2H), 6.81 (s, 1H), 6.01 (s, 1H), 5.83 (br s, 1H), 4.43 (q,  $J$  = 7.1 Hz, 2H), 4.22 (q,  $J$  = 7.1 Hz, 2H), 1.97 (s, 3H),

1.38 (t,  $J = 7.1$  Hz, 3H), 1.30 (t,  $J = 7.1$  Hz, 3H);  $^{13}\text{C}$  NMR ( $\text{CDCl}_3$ , 100 MHz, TMS):  $\delta$  168.8, 165.3, 153.7, 151.1, 133.4, 131.6, 130.1, 129.7, 123.2, 120.1, 116.3, 115.8, 62.0, 60.9, 14.8, 14.1, 14.0; HRMS calcd for  $\text{C}_{17}\text{H}_{20}\text{O}_5\text{Na}^+$  requires 327.1203, found 327.1204.

**Table 2, entry 6.** Following the general procedure, the reaction of allenolate **1a** (60 mg, 0.3 mmol), 3-bromo-4-methoxybenzaldehyde (43 mg, 0.2 mmol) and  $\text{PBU}_3$  (75  $\mu\text{L}$ , 0.3 mmol) was performed for 4 h.

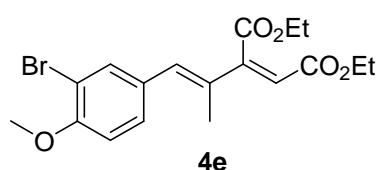

**4e:** 88% yield, as colorless oil;  $^1\text{H}$  NMR ( $\text{CDCl}_3$ , 400 MHz, TMS):  $\delta$  7.51 (s, 1H), 7.23 (d,  $J = 8.4$  Hz, 1H), 6.90 (d,  $J = 8.4$  Hz, 1H), 6.65 (s, 1H), 5.99 (s, 1H), 4.43 (q,  $J = 7.0$  Hz, 2H), 4.22 (q,  $J = 7.0$  Hz, 2H), 3.92 (s, 3H), 2.06 (s, 3H), 1.40 (t,  $J = 7.0$  Hz, 3H), 1.30 (t,  $J = 7.0$  Hz, 3H);  $^{13}\text{C}$  NMR ( $\text{CDCl}_3$ , 100 MHz, TMS):  $\delta$  168.3, 165.2, 155.4, 151.5, 134.6, 134.3, 131.5, 130.1, 130.0, 116.1, 111.41, 111.38, 61.8, 60.8, 56.2, 14.7, 14.2, 14.0; HRMS calcd for  $\text{C}_{18}\text{H}_{21}\text{BrO}_5\text{Na}^+$  requires 419.0465, found 419.0460.

**Table 2, entry 7.** Following the general procedure, the reaction of allenolate **1a** (60 mg, 0.3 mmol), 4-chlorobenzaldehyde (28 mg, 0.2 mmol) and  $\text{PBU}_3$  (75  $\mu\text{L}$ , 0.3 mmol) was run for 24 h.

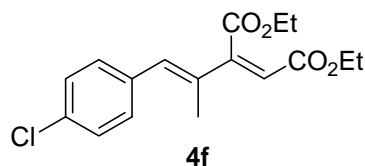

**4f:** 90% yield (obtained in 99% combined yield as an inseparable mixture with a small amount of cyclopropane (*trans,Z*)-**3d**), as a white solid, mp 64-66  $^\circ\text{C}$ ;  $^1\text{H}$  NMR ( $\text{CDCl}_3$ , 400 MHz, TMS):  $\delta$  7.34 (d,  $J = 8.5$  Hz, 2H), 7.22 (d,  $J = 8.5$  Hz, 2H), 6.72 (s, 1H), 6.01 (s, 1H), 4.43 (q,  $J = 7.1$  Hz, 2H), 4.22 (q,  $J = 7.1$  Hz, 2H), 2.04 (d,  $J = 1.1$  Hz, 3H), 1.40 (t,  $J = 7.1$  Hz, 3H), 1.30 (t,  $J = 7.1$  Hz, 3H);  $^{13}\text{C}$  NMR ( $\text{CDCl}_3$ , 100

MHz, TMS):  $\delta$  168.2, 165.1, 151.3, 134.9, 134.7, 133.7, 132.4, 130.7, 128.5, 116.6, 61.8, 60.8, 14.7, 14.1, 14.0; HRMS calcd for  $C_{17}H_{19}ClO_4Na^+$  requires 345.0864, found 345.0866.

**Table 2, entry 8.** Following the general procedure, the reaction of allenoate **1a** (60 mg, 0.3 mmol), 3-chlorobenzaldehyde (28 mg, 0.2 mmol) and  $PBu_3$  (75  $\mu$ L, 0.3 mmol) was performed for 24 h.

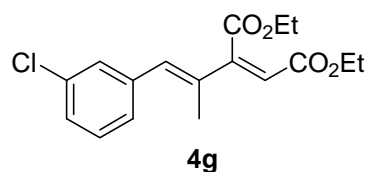

**4g:** 62% yield (obtained in 74% combined yield as an inseparable mixture with a small amount of cyclopropane (*trans,Z*)-**3e**), as colorless oil;  $^1H$  NMR ( $CDCl_3$ , 400 MHz, TMS):  $\delta$  7.30 (m, 3H), 7.16 (m, 1H), 6.71 (s, 1H), 6.03 (s, 1H), 4.43 (q,  $J = 7.1$  Hz, 2H), 4.23 (q,  $J = 7.1$  Hz, 2H), 2.05 (s, 3H), 1.40 (t,  $J = 7.1$  Hz, 3H), 1.31 (t,  $J = 7.1$  Hz, 3H);  $^{13}C$  NMR ( $CDCl_3$ , 100 MHz, TMS):  $\delta$  168.1, 165.1, 151.2, 138.1, 134.6, 134.1, 133.0, 129.5, 129.2, 127.9, 127.5, 116.9, 61.8, 60.8, 14.7, 14.1, 14.0; HRMS calcd for  $C_{17}H_{19}ClO_4Na^+$  requires 345.0864, found 345.0869.

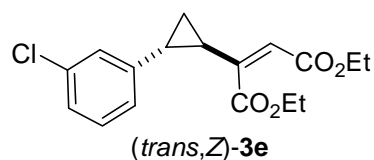

Selected  $^1H$  NMR data for (*trans,Z*)-**3e**:  $\delta$  7.07 (s, 1H), 6.99 (d,  $J = 7.2$  Hz, 1H), 5.84 (s, 1H), 4.32 (q,  $J = 7.2$  Hz, 2H), 4.18 (q,  $J = 7.1$  Hz, 2H), 2.29 (m, 1H), 1.88 (m, 1H); selected  $^{13}C$  NMR data for (*trans,Z*)-**3e**:  $\delta$  167.3, 164.6, 142.5, 129.7, 126.5, 126.1, 124.4, 117.7, 61.6, 60.7, 26.8, 25.6, 16.1, 14.1, 14.0.

**Table 2, entry 10.** Following the general procedure, the reaction of allenoate **1a** (60 mg, 0.3 mmol), 4-iodobenzaldehyde (46 mg, 0.2 mmol) and  $PBu_3$  (75  $\mu$ L, 0.3 mmol) was run for 3 h.

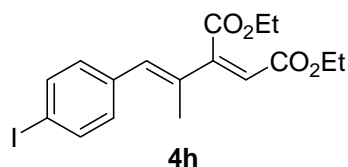

**4h**: 69% yield (obtained in 82% combined yield as an inseparable mixture with a small amount of cyclopropane (*trans,Z*)-**3g**), as a white solid, mp 50-53 °C;  $^1\text{H}$  NMR ( $\text{CDCl}_3$ , 400 MHz, TMS):  $\delta$  7.70 (d,  $J = 8.4$  Hz, 2H), 7.02 (d,  $J = 8.4$  Hz, 2H), 6.68 (s, 1H), 6.01 (s, 1H), 4.43 (q,  $J = 7.2$  Hz, 2H), 4.22 (q,  $J = 7.1$  Hz, 2H), 2.03 (s, 3H), 1.39 (t,  $J = 7.2$  Hz, 3H), 1.30 (t,  $J = 7.1$  Hz, 3H);  $^{13}\text{C}$  NMR ( $\text{CDCl}_3$ , 100 MHz, TMS):  $\delta$  168.2, 165.2, 151.3, 137.4, 135.8, 135.1, 132.6, 131.2, 116.7, 93.8, 61.8, 60.9, 14.7, 14.2, 14.0; HRMS calcd for  $\text{C}_{17}\text{H}_{19}\text{IO}_4\text{Na}^+$  requires 437.0220, found 437.0218.

**Table 2, entry 11.** Following the general procedure, the reaction of allenolate **1a** (60 mg, 0.3 mmol), 3-bromobenzaldehyde (37 mg, 0.2 mmol) and  $\text{PBU}_3$  (75  $\mu\text{L}$ , 0.3 mmol) was performed for 1 h.

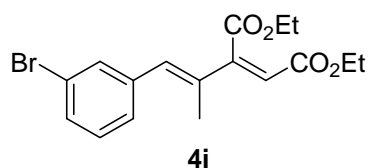

**4i**: 72% yield (obtained in 86% combined yield as a mixture with a small amount of cyclopropane (*trans,Z*)-**3h**), as colorless oil;  $^1\text{H}$  NMR ( $\text{CDCl}_3$ , 400 MHz, TMS):  $\delta$  7.35 (m, 2H), 7.16 (m, 2H), 6.63 (s, 1H), 5.95 (s, 1H), 4.36 (q,  $J = 7.2$  Hz, 2H), 4.15 (q,  $J = 7.1$  Hz, 2H), 1.97 (s, 3H), 1.32 (t,  $J = 7.2$  Hz, 3H), 1.23 (t,  $J = 7.1$  Hz, 3H);  $^{13}\text{C}$  NMR ( $\text{CDCl}_3$ , 100 MHz, TMS):  $\delta$  168.1, 165.1, 151.1, 138.4, 134.5, 133.1, 132.1, 130.8, 129.8, 128.0, 122.3, 116.9, 61.8, 60.9, 14.7, 14.1, 14.0; HRMS calcd for  $\text{C}_{17}\text{H}_{19}\text{BrO}_4\text{Na}^+$  requires 389.0359, found 389.0359.

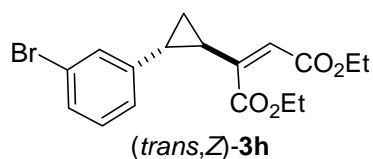

Selected  $^1\text{H}$  NMR data for (*trans,Z*)-**3h**:  $\delta$  7.25 (d,  $J = 7.8$  Hz, 1H), 7.07 (t,  $J = 7.8$  Hz, 1H), 6.96 (d,  $J = 7.8$  Hz, 1H), 5.77 (s, 1H), 4.25 (q,  $J = 7.1$  Hz, 2H), 4.10 (q,  $J = 7.1$



Hz, 2H), 2.20 (m, 1H), 1.80 (m, 1H), 1.18 (t,  $J = 7.1$  Hz, 3H); selected  $^{13}\text{C}$  NMR data for (*trans,Z*)-**3h**:  $\delta$  167.3, 164.6, 142.8, 130.0, 129.4, 129.1, 124.9, 122.6, 117.7, 61.6, 60.7, 26.9, 25.5, 16.1, 14.1, 14.0.

**Table 2, entry 12.** Following the general procedure, the reaction of allenolate **1a** (60 mg, 0.3 mmol), 4-fluorobenzaldehyde (25 mg, 0.2 mmol) and  $\text{PBU}_3$  (75  $\mu\text{L}$ , 0.3 mmol) was run for 2.5 h.

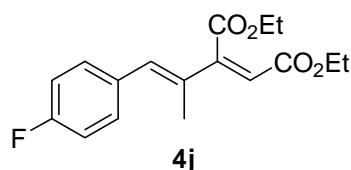

**4j**: 84% yield (obtained in 92% combined yield as a mixture with a small amount of cyclopropane (*trans,Z*)-**3i**), as colorless oil;  $^1\text{H}$  NMR ( $\text{CDCl}_3$ , 400 MHz, TMS):  $\delta$  7.27 (dd,  $J = 8.5, 5.5$  Hz, 2H), 7.06 (t,  $J = 8.5$  Hz, 2H), 6.74 (s, 1H), 6.00 (s, 1H), 4.44 (q,  $J = 7.1$  Hz, 2H), 4.22 (q,  $J = 7.2$  Hz, 2H), 2.04 (s, 3H), 1.40 (t,  $J = 7.2$  Hz, 3H), 1.30 (t,  $J = 7.1$  Hz, 3H);  $^{13}\text{C}$  NMR ( $\text{CDCl}_3$ , 100 MHz, TMS):  $\delta$  168.3, 165.2, 162.1 (d,  $^1J_{\text{CF}} = 248.7$  Hz), 151.5, 135.2, 132.3 (d,  $^4J_{\text{CF}} = 3.3$  Hz), 131.8, 131.2 (d,  $^3J_{\text{CF}} = 8.1$  Hz), 116.3, 115.3 (d,  $^2J_{\text{CF}} = 21.6$  Hz), 61.7, 60.8, 14.6, 14.1, 14.0; HRMS calcd for  $\text{C}_{17}\text{H}_{19}\text{FO}_4\text{Na}^+$  requires 329.1160, found 329.1162.

**Table 2, entry 13.** Following the general procedure, the reaction of allenolate **1a** (60 mg, 0.3 mmol), 4-nitrobenzaldehyde (30 mg, 0.2 mmol) and  $\text{PPh}_2\text{Me}$  (56  $\mu\text{L}$ , 0.3 mmol) was performed for 1 h.

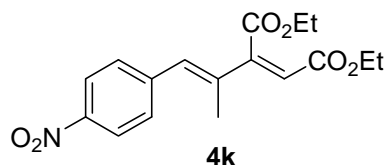

**4k**: 63% yield (obtained in 65% combined yield as a mixture with a trace amount of cyclopropane (*trans,Z*)-**3j**), as a white solid, mp 70-71  $^\circ\text{C}$ ;  $^1\text{H}$  NMR ( $\text{CDCl}_3$ , 400 MHz, TMS):  $\delta$  8.24 (d,  $J = 8.6$  Hz, 2H), 7.55 (d,  $J = 8.4$  Hz, 2H), 6.80 (s, 1H), 6.09 (s, 1H), 4.45 (q,  $J = 7.1$  Hz, 2H), 4.24 (q,  $J = 7.1$  Hz, 2H), 2.07 (s, 3H), 1.41 (t,  $J = 7.1$

Hz, 3H), 1.32 (t,  $J = 7.1$  Hz, 3H);  $^{13}\text{C}$  NMR ( $\text{CDCl}_3$ , 100 MHz, TMS):  $\delta$  167.9, 164.9, 150.6, 146.9, 142.9, 135.0, 133.4, 130.2, 123.6, 118.1, 62.0, 61.0, 14.9, 14.1, 14.0; HRMS calcd for  $\text{C}_{17}\text{H}_{19}\text{NO}_6\text{Na}^+$  requires 356.1104, found 356.1097.

**Table 2, entry 14.** Following the general procedure, the reaction of allenolate **1a** (60 mg, 0.3 mmol), 3-nitrobenzaldehyde (30 mg, 0.2 mmol) and  $\text{PPh}_2\text{Me}$  (56  $\mu\text{L}$ , 0.3 mmol) was run for 1.2 h.

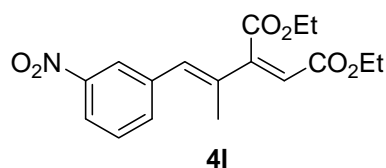

**4l:** 79% yield, as colorless oil;  $^1\text{H}$  NMR ( $\text{CDCl}_3$ , 400 MHz, TMS):  $\delta$  8.16 (s, 2H), 7.59 (m, 2H), 6.80 (s, 1H), 6.09 (s, 1H), 4.45 (q,  $J = 7.1$  Hz, 2H), 4.24 (q,  $J = 7.1$  Hz, 2H), 2.08 (s, 3H), 1.41 (t,  $J = 7.1$  Hz, 3H), 1.32 (t,  $J = 7.1$  Hz, 3H);  $^{13}\text{C}$  NMR ( $\text{CDCl}_3$ , 100 MHz, TMS):  $\delta$  167.9, 164.9, 150.6, 148.1, 137.9, 135.3, 134.3, 133.1, 129.3, 124.0, 122.5, 117.8, 61.9, 61.0, 14.7, 14.1, 14.0; HRMS calcd for  $\text{C}_{17}\text{H}_{19}\text{NO}_6\text{Na}^+$  requires 356.1104, found 356.1101.

**Table 2, entry 15.** Following the general procedure, the reaction of allenolate **1a** (60 mg, 0.3 mmol), 4-(trifluoromethyl)benzaldehyde (37 mg, 0.2 mmol) and  $\text{PPh}_2\text{Me}$  (56  $\mu\text{L}$ , 0.3 mmol) was run for 6 h.

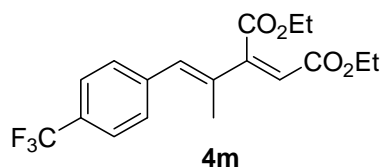

**4m:** 95% yield (obtained in 99% combined yield as a mixture with a trace amount of cyclopropane (*trans,Z*)-**3k**), as colorless oil;  $^1\text{H}$  NMR ( $\text{CDCl}_3$ , 400 MHz, TMS):  $\delta$  7.63 (d,  $J = 8.2$  Hz, 2H), 7.39 (d,  $J = 8.2$  Hz, 2H), 6.79 (s, 1H), 6.06 (s, 1H), 4.44 (q,  $J = 7.2$  Hz, 2H), 4.23 (q,  $J = 7.1$  Hz, 2H), 2.05 (d,  $J = 0.9$  Hz, 3H), 1.40 (t,  $J = 7.2$  Hz, 3H), 1.31 (t,  $J = 7.1$  Hz, 3H);  $^{13}\text{C}$  NMR ( $\text{CDCl}_3$ , 100 MHz, TMS):  $\delta$  168.1, 165.1, 151.0, 139.9, 134.5, 133.7, 129.63, 129.62 (q,  $^2J_{\text{CF}} = 32.8$  Hz), 125.2 (q,  $^3J_{\text{CF}} = 3.7$

Hz), 123.9 (q,  $^1J_{\text{CF}} = 272.0$  Hz), 117.3, 61.9, 60.9, 14.7, 14.2, 14.0; HRMS calcd for  $\text{C}_{18}\text{H}_{19}\text{F}_3\text{O}_4\text{Na}^+$  requires 379.1128, found 379.1125.

**Table 2, entry 16.** Following the general procedure, the reaction of allenolate **1a** (60 mg, 0.3 mmol), 3-(trifluoromethyl)benzaldehyde (37 mg, 0.2 mmol) and  $\text{PPh}_2\text{Me}$  (56  $\mu\text{L}$ , 0.3 mmol) was performed for 6 h.

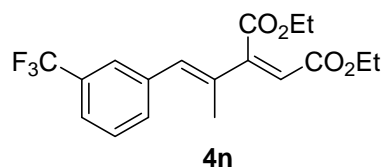

**4n:** 96% yield, as colorless oil;  $^1\text{H}$  NMR ( $\text{CDCl}_3$ , 400 MHz, TMS):  $\delta$  7.61-7.44 (m, 4H), 6.79 (s, 1H), 6.05 (s, 1H), 4.44 (q,  $J = 7.1$  Hz, 2H), 4.23 (q,  $J = 7.1$  Hz, 2H), 2.05 (s, 3H), 1.41 (t,  $J = 7.1$  Hz, 3H), 1.31 (t,  $J = 7.1$  Hz, 3H);  $^{13}\text{C}$  NMR ( $\text{CDCl}_3$ , 100 MHz, TMS):  $\delta$  168.1, 165.1, 151.0, 137.0, 134.4, 133.4, 132.6, 130.7 (q,  $^2J_{\text{CF}} = 32.2$  Hz), 128.8, 126.1 (q,  $^3J_{\text{CF}} = 3.7$  Hz), 124.5 (q,  $^3J_{\text{CF}} = 3.7$  Hz), 123.9 (q,  $^1J_{\text{CF}} = 272.4$  Hz), 117.2, 61.9, 60.9, 14.7, 14.2, 14.0; HRMS calcd for  $\text{C}_{18}\text{H}_{19}\text{F}_3\text{O}_4\text{Na}^+$  requires 379.1128, found 379.1125.

**Table 2, entry 18.** Following the general procedure, the reaction of allenolate **1a** (60 mg, 0.3 mmol), furfuraldehyde (19 mg, 0.2 mmol) and  $\text{PBu}_3$  (75  $\mu\text{L}$ , 0.3 mmol) was performed for 4 h.

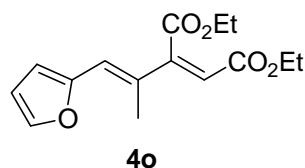

**4o:** 88% yield, as a white solid, mp 78-80  $^\circ\text{C}$ ;  $^1\text{H}$  NMR ( $\text{CDCl}_3$ , 400 MHz, TMS):  $\delta$  7.50 (d,  $J = 1.4$  Hz, 1H), 6.52 (s, 1H), 6.48 (m, 2H), 5.99 (s, 1H), 4.43 (q,  $J = 7.2$  Hz, 2H), 4.21 (q,  $J = 7.1$  Hz, 2H), 2.23 (s, 3H), 1.39 (t,  $J = 7.2$  Hz, 3H), 1.30 (t,  $J = 7.1$  Hz, 3H);  $^{13}\text{C}$  NMR ( $\text{CDCl}_3$ , 100 MHz, TMS):  $\delta$  168.4, 165.3, 152.1, 151.6, 143.7, 128.6, 123.1, 115.5, 114.4, 112.0, 61.8, 60.7, 14.7, 14.2, 14.0; HRMS calcd for  $\text{C}_{15}\text{H}_{18}\text{O}_5\text{Na}^+$  requires 301.1046, found 301.1041.

**Table 2, entry 19.** Following the general procedure, the reaction of allenoate **1a** (60 mg, 0.3 mmol), thiophene-2-carbaldehyde (22 mg, 0.2 mmol) and PBu<sub>3</sub> (75  $\mu$ L, 0.3 mmol) was performed for 1 h.

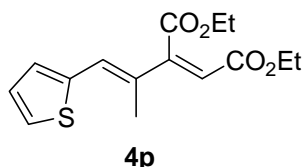

**4p**: 85% yield, as a white solid, mp 80-81 °C; <sup>1</sup>H NMR (CDCl<sub>3</sub>, 400 MHz, TMS):  $\delta$  7.44 (d,  $J$  = 5.0 Hz, 1H), 7.15 (d,  $J$  = 3.6 Hz, 1H), 7.08 (dd,  $J$  = 5.0, 3.6 Hz, 1H), 6.89 (s, 1H), 5.99 (s, 1H), 4.44 (q,  $J$  = 7.1 Hz, 2H), 4.21 (q,  $J$  = 7.1 Hz, 2H), 2.20 (s, 3H), 1.40 (t,  $J$  = 7.2 Hz, 3H), 1.30 (t,  $J$  = 7.1 Hz, 3H); <sup>13</sup>C NMR (CDCl<sub>3</sub>, 100 MHz, TMS):  $\delta$  168.4, 165.3, 151.7, 139.4, 131.2, 129.0, 128.9, 128.5, 127.3, 115.6, 61.8, 60.7, 15.1, 14.2, 14.0; HRMS calcd for C<sub>15</sub>H<sub>18</sub>O<sub>4</sub>SN<sup>+</sup> requires 317.0818, found 317.0815.

**Table 2, entry 20.** Following the general procedure, the reaction of allenoate **1a** (60 mg, 0.3 mmol), *E*-cinnamaldehyde (26 mg, 0.2 mmol) and PBu<sub>3</sub> (75  $\mu$ L, 0.3 mmol) was performed for 24 h.

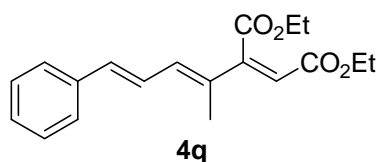

**4q**: 80% yield, as a yellow solid, mp 106-107 °C; <sup>1</sup>H NMR (CDCl<sub>3</sub>, 400 MHz, TMS):  $\delta$  7.46 (d,  $J$  = 7.3 Hz, 2H), 7.35 (t,  $J$  = 7.3 Hz, 2H), 7.29 (d,  $J$  = 7.1 Hz, 1H), 7.14 (dd,  $J$  = 15.3, 11.0 Hz, 1H), 6.75 (d,  $J$  = 15.3 Hz, 1H), 6.47 (d,  $J$  = 11.0 Hz, 1H), 5.93 (s, 1H), 4.45 (q,  $J$  = 7.0 Hz, 2H), 4.21 (q,  $J$  = 7.0 Hz, 2H), 2.05 (s, 3H), 1.41 (t,  $J$  = 7.0 Hz, 3H), 1.30 (t,  $J$  = 7.0 Hz, 3H); <sup>13</sup>C NMR (CDCl<sub>3</sub>, 100 MHz, TMS):  $\delta$  168.4, 165.4, 151.3, 138.2, 136.7, 136.2, 130.8, 128.8, 128.6, 126.9, 124.3, 115.1, 61.7, 60.7, 14.2, 14.1, 13.6; HRMS calcd for C<sub>19</sub>H<sub>22</sub>O<sub>4</sub>Na<sup>+</sup> requires 337.1410, found 337.1416.

**Table 2, entry 21.** Following the general procedure, the reaction of allenoate **1a** (60 mg, 0.3 mmol), propionaldehyde (12 mg, 0.2 mmol) and PBu<sub>3</sub> (75  $\mu$ L, 0.3 mmol) was

run for 40 h.

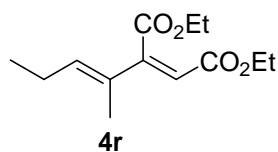

**4r**: 98% yield, as colorless oil;  $^1\text{H}$  NMR ( $\text{CDCl}_3$ , 400 MHz, TMS):  $\delta$  5.82 (s, 1H), 5.80 (t,  $J = 7.1$  Hz, 1H), 4.39 (q,  $J = 7.1$  Hz, 2H), 4.19 (q,  $J = 7.1$  Hz, 2H), 2.23 (p,  $J = 7.4$  Hz, 2H), 1.83 (s, 3H), 1.37 (t,  $J = 7.2$  Hz, 3H), 1.28 (t,  $J = 7.1$  Hz, 3H), 1.02 (t,  $J = 7.4$  Hz, 3H);  $^{13}\text{C}$  NMR ( $\text{CDCl}_3$ , 100 MHz, TMS):  $\delta$  168.5, 165.5, 151.6, 141.1, 130.0, 114.2, 61.5, 60.6, 22.4, 14.2, 14.0, 13.3, 13.0; HRMS calcd for  $\text{C}_{13}\text{H}_{20}\text{O}_4\text{Na}^+$  requires 263.1254, found 263.1255.

**Table 2, entry 22.** Following the general procedure, the reaction of allenolate **1a** (60 mg, 0.3 mmol), butyraldehyde (14 mg, 0.2 mmol) and  $\text{PBu}_3$  (75  $\mu\text{L}$ , 0.3 mmol) was performed for 24 h.

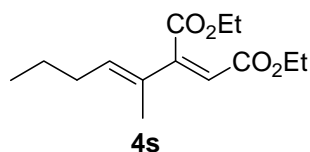

**4s**: 99% yield, as colorless oil;  $^1\text{H}$  NMR ( $\text{CDCl}_3$ , 400 MHz, TMS):  $\delta$  5.82 (m, 2H), 4.39 (q,  $J = 7.1$  Hz, 2H), 4.19 (q,  $J = 7.1$  Hz, 2H), 2.20 (q,  $J = 7.3$  Hz, 2H), 1.83 (s, 3H), 1.45 (m, 2H), 1.37 (t,  $J = 7.1$  Hz, 3H), 1.28 (t,  $J = 7.1$  Hz, 3H), 0.92 (t,  $J = 7.4$  Hz, 3H);  $^{13}\text{C}$  NMR ( $\text{CDCl}_3$ , 100 MHz, TMS):  $\delta$  168.6, 165.5, 151.6, 139.7, 130.5, 114.1, 61.5, 60.6, 31.1, 22.1, 14.2, 14.0, 13.8, 13.1; HRMS calcd for  $\text{C}_{14}\text{H}_{22}\text{O}_4\text{Na}^+$  requires 277.1410, found 277.1412.

**Table 2, entry 23.** Following the general procedure, the reaction of allenolate **1a** (60 mg, 0.3 mmol), 3-methylbutanal (17 mg, 0.2 mmol) and  $\text{PBu}_3$  (75  $\mu\text{L}$ , 0.3 mmol) was performed for 24 h.

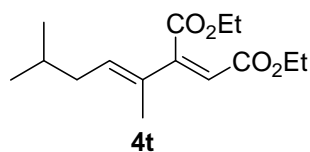

**4t**: 97% yield, as colorless oil;  $^1\text{H}$  NMR ( $\text{CDCl}_3$ , 400 MHz, TMS):  $\delta$  5.84 (t,  $J = 7.4$

Hz, 1H), 5.82 (s, 1H), 4.39 (q,  $J = 7.2$  Hz, 2H), 4.19 (q,  $J = 7.1$  Hz, 2H), 2.11 (t,  $J = 7.4$  Hz, 2H), 1.83 (s, 3H), 1.72 (m, 1H), 1.37 (t,  $J = 7.2$  Hz, 3H), 1.28 (t,  $J = 7.1$  Hz, 3H), 0.91 (d,  $J = 6.7$  Hz, 6H);  $^{13}\text{C}$  NMR ( $\text{CDCl}_3$ , 100 MHz, TMS):  $\delta$  168.6, 165.5, 151.7, 138.8, 130.9, 114.1, 61.4, 60.6, 38.1, 28.6, 22.4, 14.2, 14.1, 13.2; HRMS calcd for  $\text{C}_{15}\text{H}_{24}\text{O}_4\text{Na}^+$  requires 291.1567, found 291.1570.

**Table 2, entry 24.** Following the general procedure, the reaction of allenolate **1a** (60 mg, 0.3 mmol), hexanal (20 mg, 0.2 mmol) and  $\text{PBU}_3$  (75  $\mu\text{L}$ , 0.3 mmol) was run for 24 h.

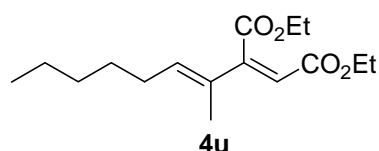

**4u:** 87% yield, as colorless oil;  $^1\text{H}$  NMR ( $\text{CDCl}_3$ , 400 MHz, TMS):  $\delta$  5.82 (t,  $J = 7.5$  Hz, 1H), 5.81 (s, 1H), 4.38 (q,  $J = 7.2$  Hz, 2H), 4.19 (q,  $J = 7.1$  Hz, 2H), 2.21 (q,  $J = 7.3$  Hz, 2H), 1.83 (s, 3H), 1.41 (m, 2H), 1.37 (t,  $J = 7.2$  Hz, 3H), 1.28 (m, 7H), 0.88 (t,  $J = 6.8$  Hz, 3H);  $^{13}\text{C}$  NMR ( $\text{CDCl}_3$ , 100 MHz, TMS):  $\delta$  168.5, 165.5, 151.6, 139.9, 130.3, 114.1, 61.5, 60.6, 31.4, 29.1, 28.5, 22.4, 14.1, 14.00, 13.95, 13.1; HRMS calcd for  $\text{C}_{16}\text{H}_{26}\text{O}_4\text{Na}^+$  requires 305.1723, found 305.1729.

**Table 2, entry 25.** Following the general procedure, the reaction of allenolate **1b** (60 mg, 0.4 mmol), benzaldehyde (21 mg, 0.2 mmol) and  $\text{PPh}_2\text{Me}$  (75  $\mu\text{L}$ , 0.4 mmol) was performed for 24 h.

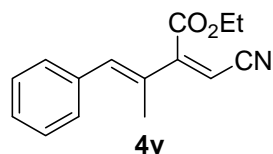

**4v:** 63% yield, as colorless oil;  $^1\text{H}$  NMR ( $\text{CDCl}_3$ , 400 MHz, TMS):  $\delta$  7.39 (m, 2H), 7.32 (m, 3H), 6.88 (s, 1H), 5.59 (s, 1H), 4.46 (q,  $J = 7.1$  Hz, 2H), 2.05 (s, 3H), 1.44 (t,  $J = 7.1$  Hz, 3H);  $^{13}\text{C}$  NMR ( $\text{CDCl}_3$ , 100 MHz, TMS):  $\delta$  165.7, 156.8, 137.5, 135.7, 130.7, 129.5, 128.38, 128.35, 115.9, 96.6, 62.6, 14.5, 14.0; HRMS calcd for  $\text{C}_{15}\text{H}_{15}\text{NO}_2\text{Na}^+$  requires 264.0995, found 264.0993.

**Table 2, entry 26.** Following the general procedure, the reaction of allenolate **1c** (60 mg, 0.3 mmol), benzaldehyde (21 mg, 0.2 mmol) and PBu<sub>3</sub> (75  $\mu$ L, 0.3 mmol) was performed for 24 h.

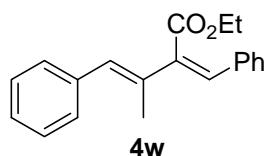

**4w:** 91% yield, as colorless oil; <sup>1</sup>H NMR (CDCl<sub>3</sub>, 400 MHz, TMS):  $\delta$  7.38-7.25 (m, 10H), 6.81 (s, 1H), 6.65 (s, 1H), 4.28 (d,  $J$  = 7.1 Hz, 2H), 2.14 (s, 3H), 1.21 (t,  $J$  = 7.1 Hz, 3H); <sup>13</sup>C NMR (CDCl<sub>3</sub>, 100 MHz, TMS):  $\delta$  170.1, 138.6, 137.4, 135.8, 133.6, 130.4, 129.4, 128.5, 128.4, 128.2, 128.1, 128.0, 126.9, 61.4, 15.1, 13.9; HRMS calcd for C<sub>20</sub>H<sub>20</sub>O<sub>2</sub>Na<sup>+</sup> requires 315.1355, found 315.1357.

**Table 2, entry 27.** Following the general procedure, the reaction of allenolate **1d** (68 mg, 0.3 mmol), benzaldehyde (21 mg, 0.2 mmol) and PBu<sub>3</sub> (75  $\mu$ L, 0.3 mmol) was performed for 4 h.

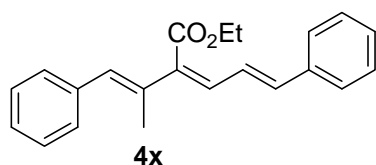

**4x:** 79% yield, as yellow oil; <sup>1</sup>H NMR (CDCl<sub>3</sub>, 400 MHz, TMS):  $\delta$  7.44 (d,  $J$  = 7.7 Hz, 2H), 7.37-7.24 (m, 8H), 7.08 (dd,  $J$  = 15.4, 11.3 Hz, 1H), 6.78 (d,  $J$  = 15.4 Hz, 1H), 6.63 (d,  $J$  = 11.3 Hz, 1H), 6.58 (s, 1H), 4.43 (q,  $J$  = 7.1 Hz, 2H), 2.10 (s, 3H), 1.43 (t,  $J$  = 7.1 Hz, 3H); <sup>13</sup>C NMR (CDCl<sub>3</sub>, 100 MHz, TMS):  $\delta$  169.0, 138.3, 137.5, 137.0, 136.8, 133.9, 130.8, 130.2, 129.3, 128.7, 128.3, 128.1, 126.9, 126.1, 125.1, 61.1, 15.5, 14.4; HRMS calcd for C<sub>22</sub>H<sub>22</sub>O<sub>2</sub>Na<sup>+</sup> requires 341.1512, found 341.1517.

**Scheme 2.** Following the general procedure, the reaction of allenolate **1a** (120 mg, 0.6 mmol), the dialdehyde (0.2 mmol) and PBu<sub>3</sub> (150  $\mu$ L, 0.6 mmol) was performed for 24 h.

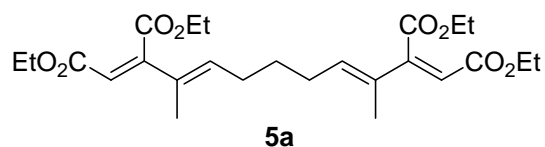

**5a:** 52% yield from glutaraldehyde, as colorless oil;  $^1\text{H}$  NMR ( $\text{CDCl}_3$ , 400 MHz, TMS):  $\delta$  5.82 (s, 2H), 5.78 (t,  $J = 7.2$  Hz, 2H), 4.37 (q,  $J = 7.1$  Hz, 4H), 4.19 (q,  $J = 7.1$  Hz, 4H), 2.22 (q,  $J = 7.3$  Hz, 4H), 1.81 (s, 6H), 1.55 (m, 2H), 1.36 (t,  $J = 7.1$  Hz, 6H), 1.28 (t,  $J = 7.1$  Hz, 6H);  $^{13}\text{C}$  NMR ( $\text{CDCl}_3$ , 100 MHz, TMS):  $\delta$  168.4, 165.4, 151.4, 138.3, 131.1, 114.6, 61.5, 60.6, 28.5, 28.0, 14.2, 14.0, 13.2; HRMS calcd for  $\text{C}_{25}\text{H}_{36}\text{O}_8\text{Na}^+$  requires 487.2302, found 487.2305.

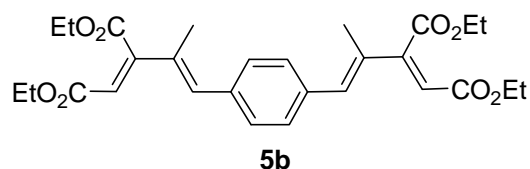

**5b:** 61% yield from terephthalic aldehyde, as a white solid, mp 93-94 °C;  $^1\text{H}$  NMR ( $\text{CDCl}_3$ , 400 MHz, TMS):  $\delta$  7.31 (s, 4H), 6.76 (s, 2H), 6.02 (s, 2H), 4.44 (q,  $J = 7.2$  Hz, 4H), 4.23 (q,  $J = 7.1$  Hz, 4H), 2.09 (s, 6H), 1.40 (t,  $J = 7.2$  Hz, 6H), 1.31 (t,  $J = 7.1$  Hz, 6H);  $^{13}\text{C}$  NMR ( $\text{CDCl}_3$ , 100 MHz, TMS):  $\delta$  168.3, 165.2, 151.6, 136.0, 135.7, 132.4, 129.5, 116.5, 61.8, 60.8, 14.8, 14.2, 14.0; HRMS calcd for  $\text{C}_{28}\text{H}_{34}\text{O}_8\text{Na}^+$  requires 499.2326, found 499.2327.



## V. X-ray Crystallographic Data for 4b and 4k

**Table 1.** Crystal Data and Structure Refinement for Diene **4b**

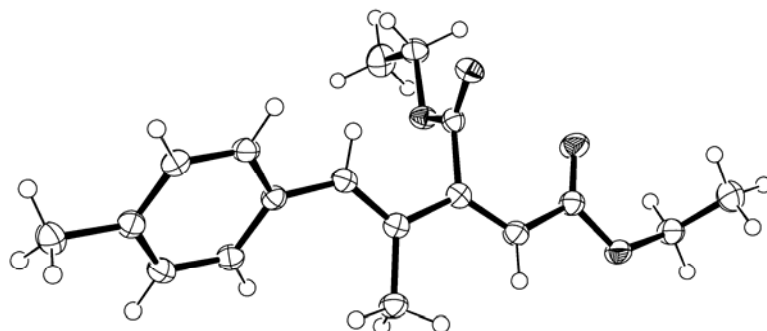

|                                   |                                                                                            |
|-----------------------------------|--------------------------------------------------------------------------------------------|
| Identification code               | <b>4b</b>                                                                                  |
| Empirical formula                 | C <sub>18</sub> H <sub>22</sub> O <sub>4</sub>                                             |
| Formula weight                    | 302.36                                                                                     |
| Temperature                       | 113(2) K                                                                                   |
| Wavelength                        | 1.54187 Å                                                                                  |
| Crystal system                    | Monoclinic                                                                                 |
| Space group                       | P 1 21/n 1                                                                                 |
| Unit cell dimensions              | a = 14.985(3) Å, α = 90°<br>b = 7.5030(14) Å, β = 108.888(11)°<br>c = 15.386(3) Å, γ = 90° |
| Volume                            | 1636.7(6) Å <sup>3</sup>                                                                   |
| Z                                 | 4                                                                                          |
| Calculated density                | 1.227 Mg/m <sup>3</sup>                                                                    |
| Absorption coefficient            | 0.696 mm <sup>-1</sup>                                                                     |
| F(000)                            | 648                                                                                        |
| Crystal size                      | 0.36 x 0.34 x 0.26 mm <sup>3</sup>                                                         |
| θ range for data collection       | 3.58 to 72.64°                                                                             |
| Limiting indices                  | -18 ≤ h ≤ 18, -8 ≤ k ≤ 9, -16 ≤ l ≤ 19                                                     |
| Reflections collected             | 16873                                                                                      |
| Independent reflections           | 3188 [R(int) = 0.0597]                                                                     |
| Completeness to θ = 25.02°        | 99.7 %                                                                                     |
| Absorption correction             | Semi-empirical from equivalents                                                            |
| Max. and min. transmission        | 0.8397 and 0.7877                                                                          |
| Refinement method                 | Full-matrix least-squares on F <sup>2</sup>                                                |
| Data / restraints / parameters    | 3188 / 0 / 204                                                                             |
| Goodness-of-fit on F <sup>2</sup> | 1.121                                                                                      |
| Final R indices [I > 2σ(I)]       | R1 = 0.0523, wR2 = 0.1324                                                                  |
| R indices (all data)              | R1 = 0.0569, wR2 = 0.1479                                                                  |
| Extinction coefficient            | 0.034(2)                                                                                   |
| Largest diff. peak and hole       | 0.364 and -0.464 e. Å <sup>-3</sup>                                                        |

**Table 2.** Crystal Data and Structure Refinement for Diene **4k**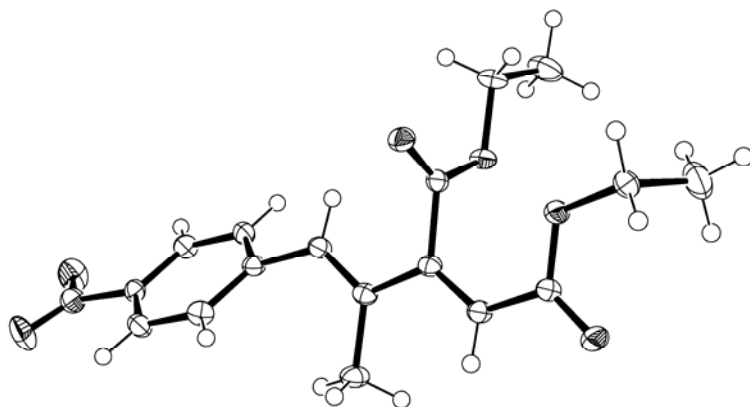

|                                   |                                                                                                       |
|-----------------------------------|-------------------------------------------------------------------------------------------------------|
| Identification code               | <b>4k</b>                                                                                             |
| Empirical formula                 | C <sub>17</sub> H <sub>19</sub> NO <sub>6</sub>                                                       |
| Formula weight                    | 333.33                                                                                                |
| Temperature                       | 113(2) K                                                                                              |
| Wavelength                        | 0.71073 Å                                                                                             |
| Crystal system                    | Triclinic                                                                                             |
| Space group                       | P-1                                                                                                   |
| Unit cell dimensions              | a = 8.8667(18) Å, α = 105.71(3)°<br>b = 9.0480(18) Å, β = 98.61(3)°<br>c = 11.101(2) Å, γ = 96.29(3)° |
| Volume                            | 837.1(3) Å <sup>3</sup>                                                                               |
| Z                                 | 2                                                                                                     |
| Calculated density                | 1.323 Mg/m <sup>3</sup>                                                                               |
| Absorption coefficient            | 0.101 mm <sup>-1</sup>                                                                                |
| F(000)                            | 352                                                                                                   |
| Crystal size                      | 0.20 x 0.18 x 0.12 mm <sup>3</sup>                                                                    |
| θ range for data collection       | 2.35 to 27.88°                                                                                        |
| Limiting indices                  | -11 ≤ h ≤ 11, -11 ≤ k ≤ 11, -14 ≤ l ≤ 14                                                              |
| Reflections collected             | 10609                                                                                                 |
| Independent reflections           | 3981 [R(int) = 0.0745]                                                                                |
| Completeness to θ = 25.02°        | 99.5 %                                                                                                |
| Absorption correction             | Semi-empirical from equivalents                                                                       |
| Max. and min. transmission        | 0.9880 and 0.9801                                                                                     |
| Refinement method                 | Full-matrix least-squares on F <sup>2</sup>                                                           |
| Data / restraints / parameters    | 3981 / 0 / 221                                                                                        |
| Goodness-of-fit on F <sup>2</sup> | 0.613                                                                                                 |
| Final R indices [I > 2σ(I)]       | R1 = 0.0618, wR2 = 0.1422                                                                             |
| R indices (all data)              | R1 = 0.0852, wR2 = .1508                                                                              |
| Extinction coefficient            | 1.79(5)                                                                                               |
| Largest diff. peak and hole       | 0.721 and -0.432 e. Å <sup>-3</sup>                                                                   |

## VI. Mechanistic Study

### Deuterium-labeling experiments

(a) Following the general procedure, deuterated allenoate **1a-d<sub>2</sub>**<sup>6</sup> (80% D, 60 mg, 0.3 mmol) was reacted with benzaldehyde **2a** (21 mg, 0.2 mmol) and Bu<sub>3</sub>P (75 μL, 0.3 mmol) for 24 h. Deuterated diene **4a-d<sub>4</sub>** were obtained in 84% yield with deuterium incorporations as shown in eq 1.

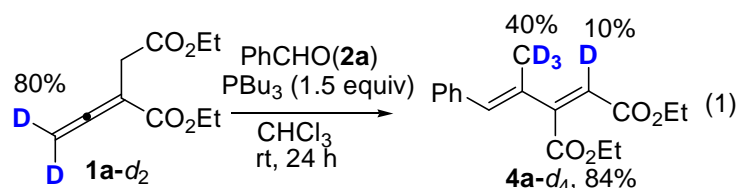

**4a-d<sub>4</sub>**: 84% yield, as colorless oil; <sup>1</sup>H NMR (CDCl<sub>3</sub>, 400 MHz, TMS): δ 7.37 (m, 2H), 7.29 (m, 3H), 6.80 (s, 1H), 6.01 (s, 0.90H), 4.44 (q, *J* = 7.2 Hz, 2H), 4.22 (q, *J* = 7.1 Hz, 2H), 2.04 (m, 1.79H), 1.40 (t, *J* = 7.2 Hz, 3H), 1.30 (t, *J* = 7.1 Hz, 3H).

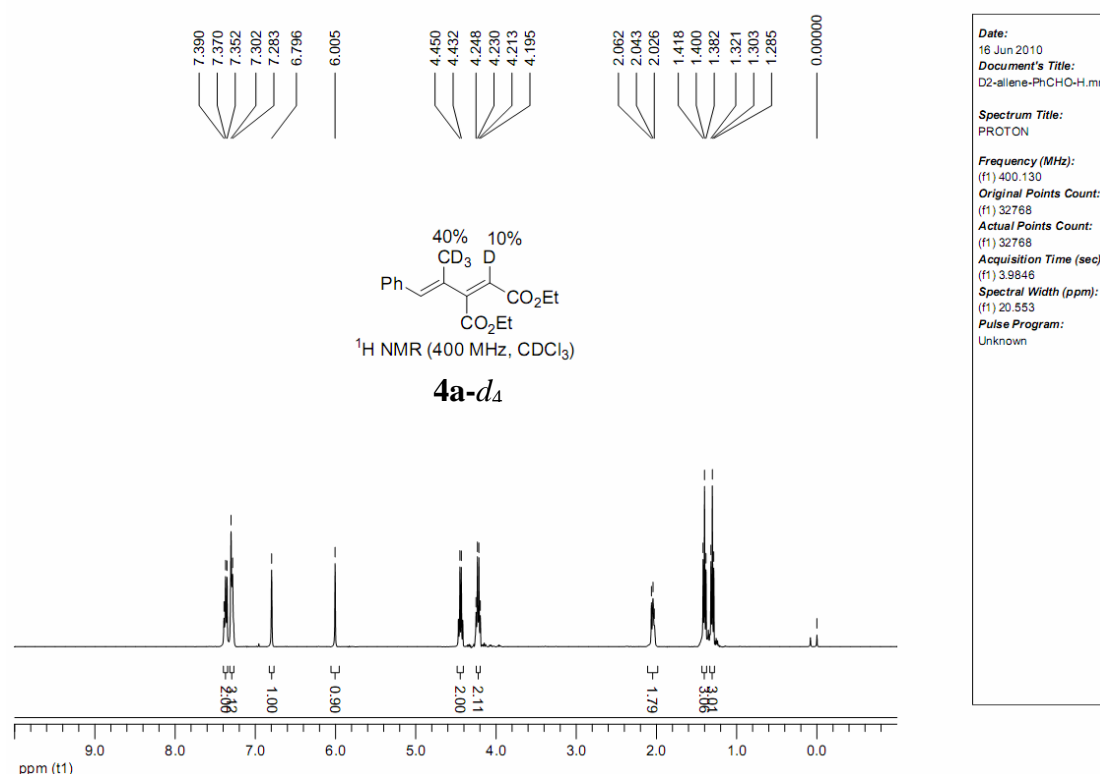

Date:  
 16 Jun 2010  
 Document's Title:  
 D2-allene-PhCHO-H.mrc  
 Spectrum Title:  
 PROTON  
 Frequency (MHz):  
 (f1) 400.130  
 Original Points Count:  
 (f1) 32768  
 Actual Points Count:  
 (f1) 32768  
 Acquisition Time (sec):  
 (f1) 3.9846  
 Spectral Width (ppm):  
 (f1) 20.553  
 Pulse Program:  
 Unknown

<sup>6</sup> Preparation of deuterated allenoate **1a-d<sub>2</sub>** (80% D) was reported: Xu, S.; Zhou, L.; Ma, R.; Song, H.; He, Z. *Org. Lett.* **2010**, *12*, 544-547.

(b) At room temperature and under nitrogen atmosphere, to a stirred solution of allenolate **1a** (60 mg, 0.3 mmol), benzaldehyde **2a** (21 mg, 0.2 mmol) and D<sub>2</sub>O (6 mg, 0.3 mmol) in anhydrous CHCl<sub>3</sub> (5 mL) was added Bu<sub>3</sub>P (75 μL, 0.3 mmol) by the means of microsyringe. The resulting mixture was further stirred for 24 h. After removal of solvent on a rotary evaporator, the residue was purified by column chromatography on silica gel (petroleum ether/ethyl acetate 20:1–5:1) to afford an inseparable mixture of diene **4a-d<sub>4</sub>** (52% yield) and cyclopropane **3a** (11% yield), with deuterium incorporations shown in eq 2.

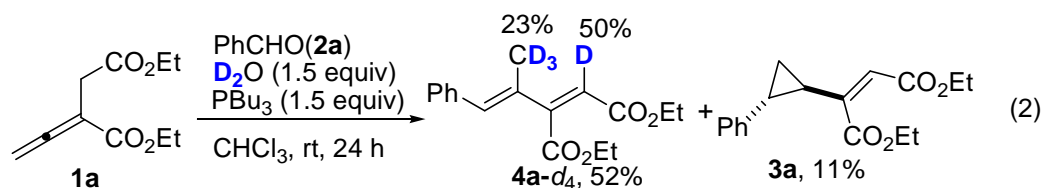

**4a-d<sub>4</sub>**: 52% yield (obtained in 63% combined yield as a mixture with a small amount of cyclopropane **3a**), as colorless oil; <sup>1</sup>H NMR (CDCl<sub>3</sub>, 400 MHz, TMS): δ 7.37 (m, 2H), 7.29 (m, 3H), 6.80 (s, 1H), 6.01 (s, 0.50H), 4.44 (q, *J* = 7.2 Hz, 2H), 4.22 (q, *J* = 7.1 Hz, 2H), 2.06 (m, 2.31 H), 1.40 (t, *J* = 7.2 Hz, 3H), 1.30 (t, *J* = 7.1 Hz, 3H).

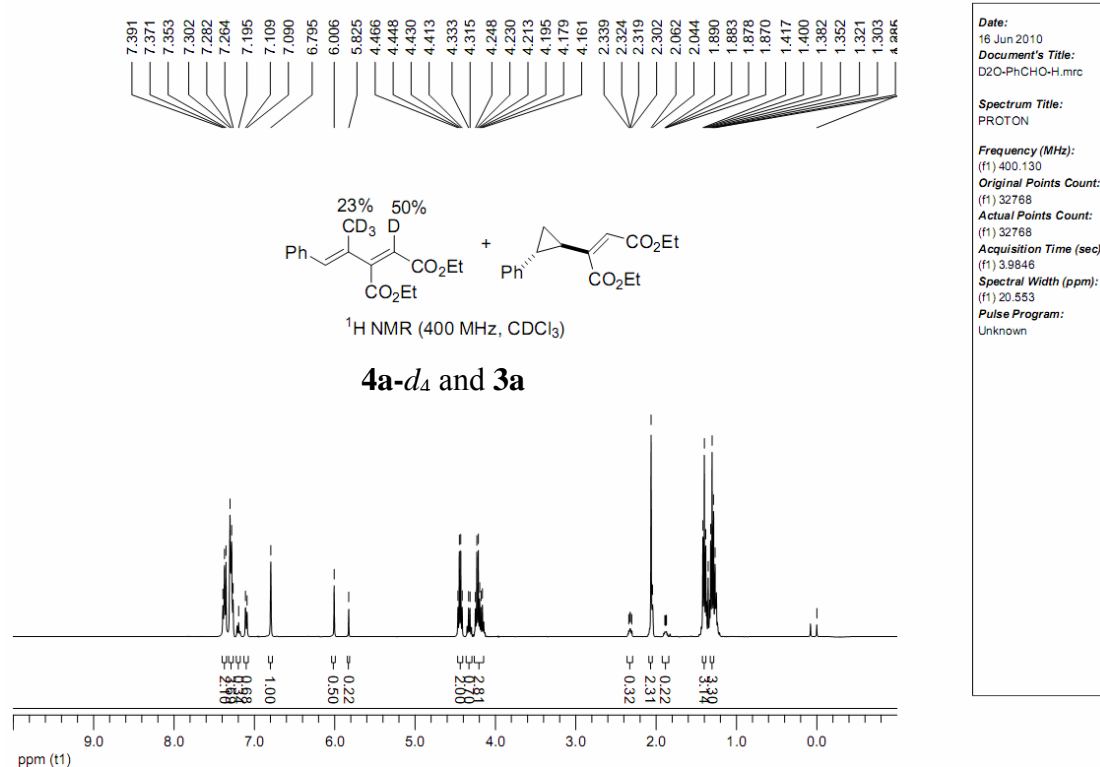

Date: 16 Jun 2010  
 Document's Title: D2O-PhCHO-H.mrc  
 Spectrum Title: PROTON  
 Frequency (MHz): (f1) 400.130  
 Original Points Count: (f1) 32768  
 Actual Points Count: (f1) 32768  
 Acquisition Time (sec): (f1) 3.9846  
 Spectral Width (ppm): (f1) 20.553  
 Pulse Program: Unknown

## <sup>31</sup>P NMR Tracking Experiment

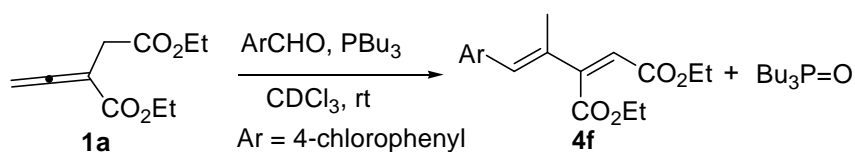

To a solution of allenolate **1a** (15 mg, 0.075 mmol) and 4-chlorobenzaldehyde (7 mg, 0.05 mmol) in CDCl<sub>3</sub> (0.5 mL) in a N<sub>2</sub>-filled NMR tube was added PBu<sub>3</sub> (19 μL, 0.075 mmol) by the means of microsyringe. The resulting mixture was shaken up and applied to <sup>31</sup>P NMR tracking. At the early stage, the sample was scanned at 10 min interval. An appreciable signal at δ 21.7 ppm emerged along with signals at δ 48.6 and δ -30.8 ppm which correspond to Bu<sub>3</sub>PO and PBu<sub>3</sub>, respectively. The signal at δ 21.7 ppm disappeared within 5 min upon addition of more 4-chlorobenzaldehyde (3 mg, 0.025 mmol) into the sample.

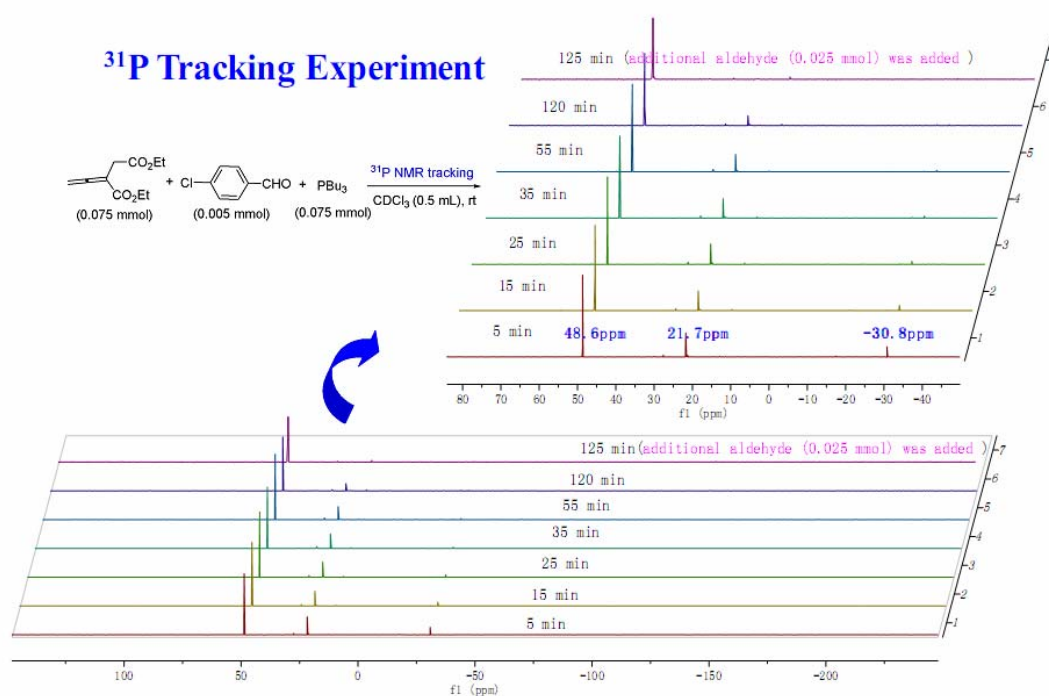

## VII. $^1\text{H}$ and $^{13}\text{C}$ NMR Spectra of **1e**, **3**, **4** and **5**

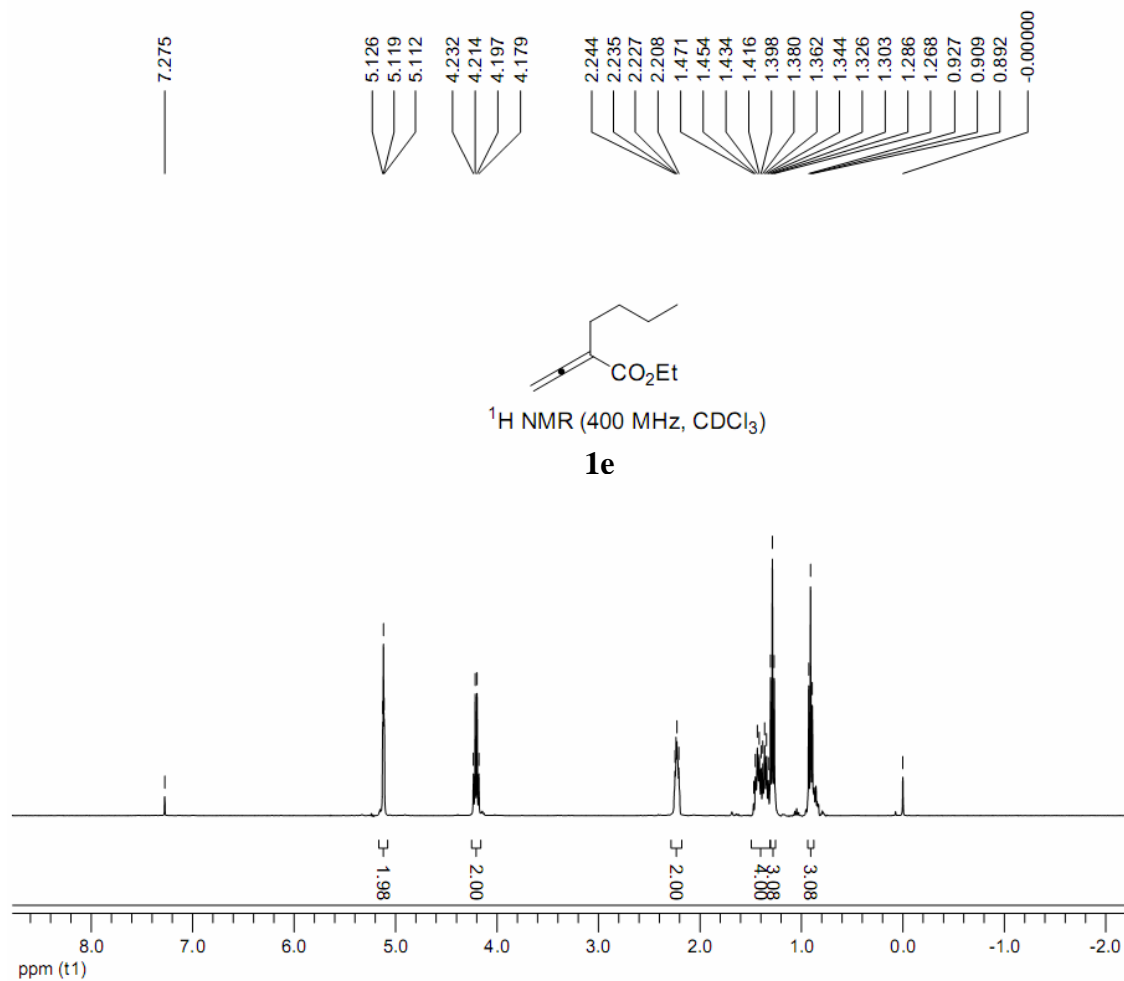

Date:

16 Jun 2010

Document's Title:

abutyllallene-H.mrc

Spectrum Title:

PROTON

Frequency (MHz):

(f1) 400.130

Original Points Count:

(f1) 32768

Actual Points Count:

(f1) 32768

Acquisition Time (sec):

(f1) 3.9846

Spectral Width (ppm):

(f1) 20.553

Pulse Program:

Unknown

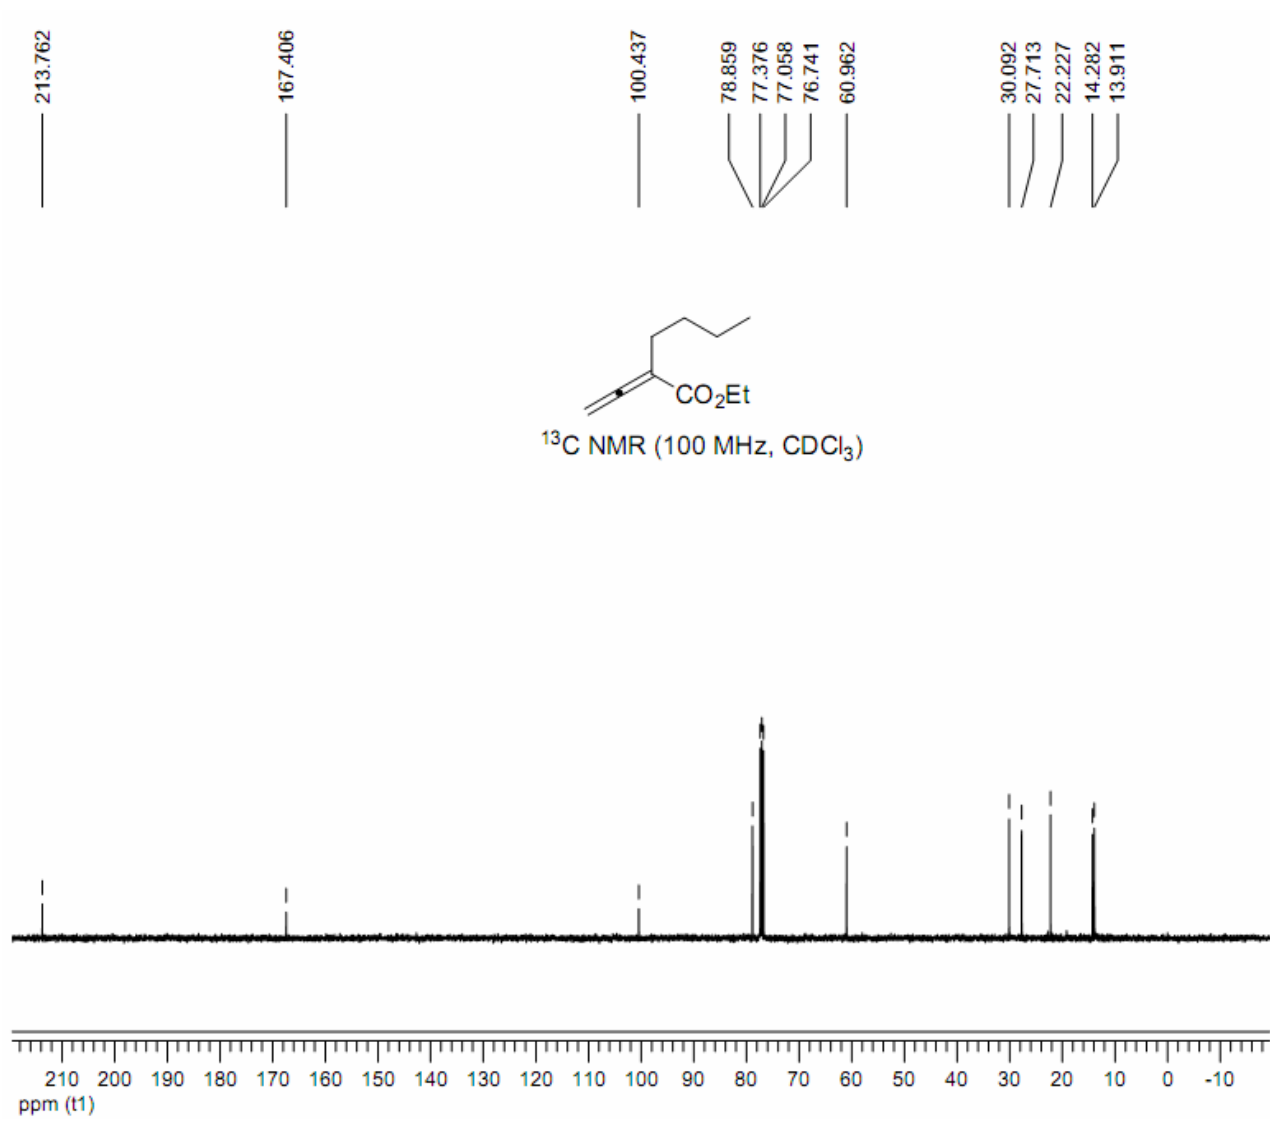

**Date:**  
16 Jun 2010

**Document's Title:**  
ethyl-allene-C.mrc

**Spectrum Title:**  
C13CPD

**Frequency (MHz):**  
(f1) 100.613

**Original Points Count:**  
(f1) 32768

**Actual Points Count:**  
(f1) 32768

**Acquisition Time (sec):**  
(f1) 1.3631

**Spectral Width (ppm):**  
(f1) 238.921

**Pulse Program:**  
Unknown

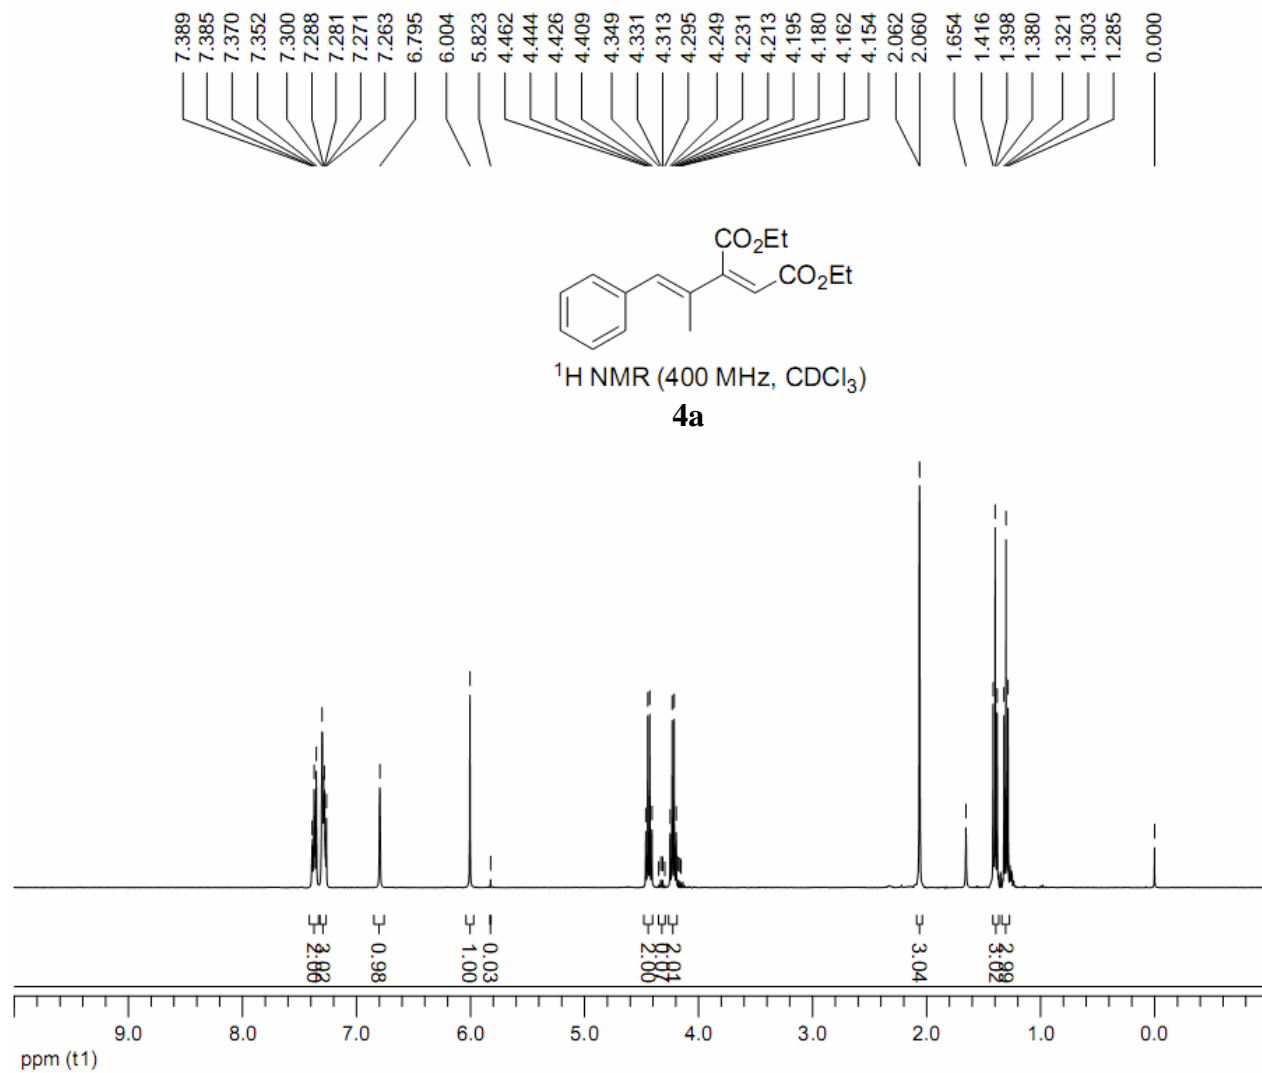

**Date:**  
 15 Jun 2010  
**Document's Title:**  
 ph-H.mrc  
**Spectrum Title:**  
 PROTON  
**Frequency (MHz):**  
 (f1) 400.132  
**Original Points Count:**  
 (f1) 23025  
**Actual Points Count:**  
 (f1) 65536  
**Acquisition Time (sec):**  
 (f1) 2.7998  
**Spectral Width (ppm):**  
 (f1) 20.552  
**Pulse Program:**  
 ZG30  
**Temperature:**  
 293.4  
**Number of Scans:**  
 8  
**Acq. Date:**  
 Sat Sep 19 10:15:07 AM



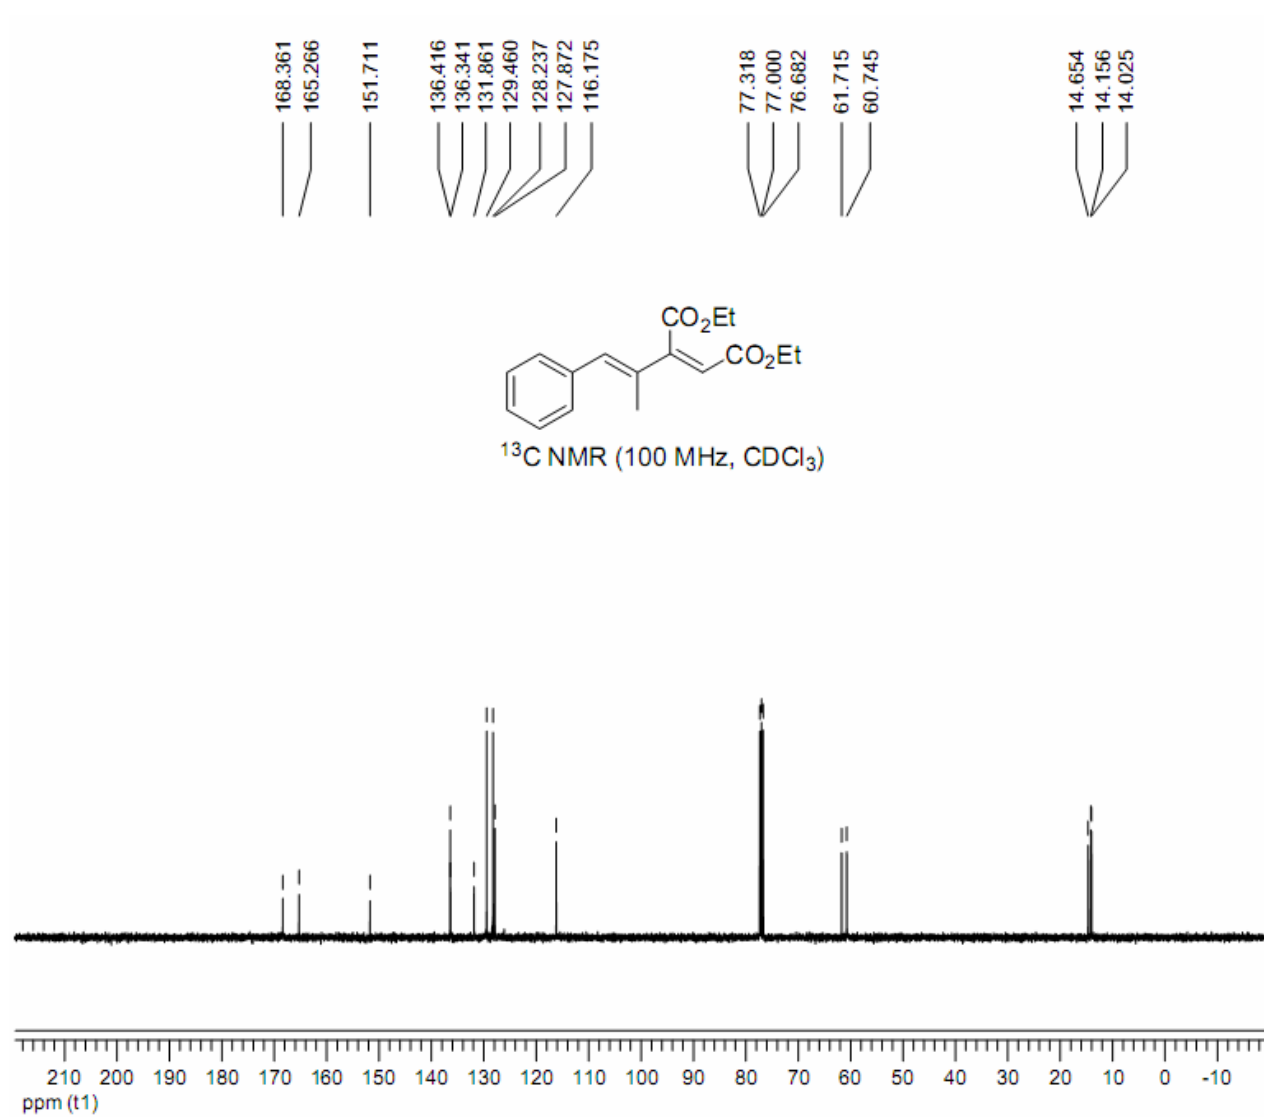

**Date:**  
15 Jun 2010  
**Document's Title:**  
ph-C.mrc

**Spectrum Title:**  
C13CPD

**Frequency (MHz):**  
(f1) 100.613  
**Original Points Count:**  
(f1) 32768  
**Actual Points Count:**  
(f1) 32768  
**Acquisition Time (sec):**  
(f1) 1.3631  
**Spectral Width (ppm):**  
(f1) 238.921  
**Pulse Program:**  
Unknown

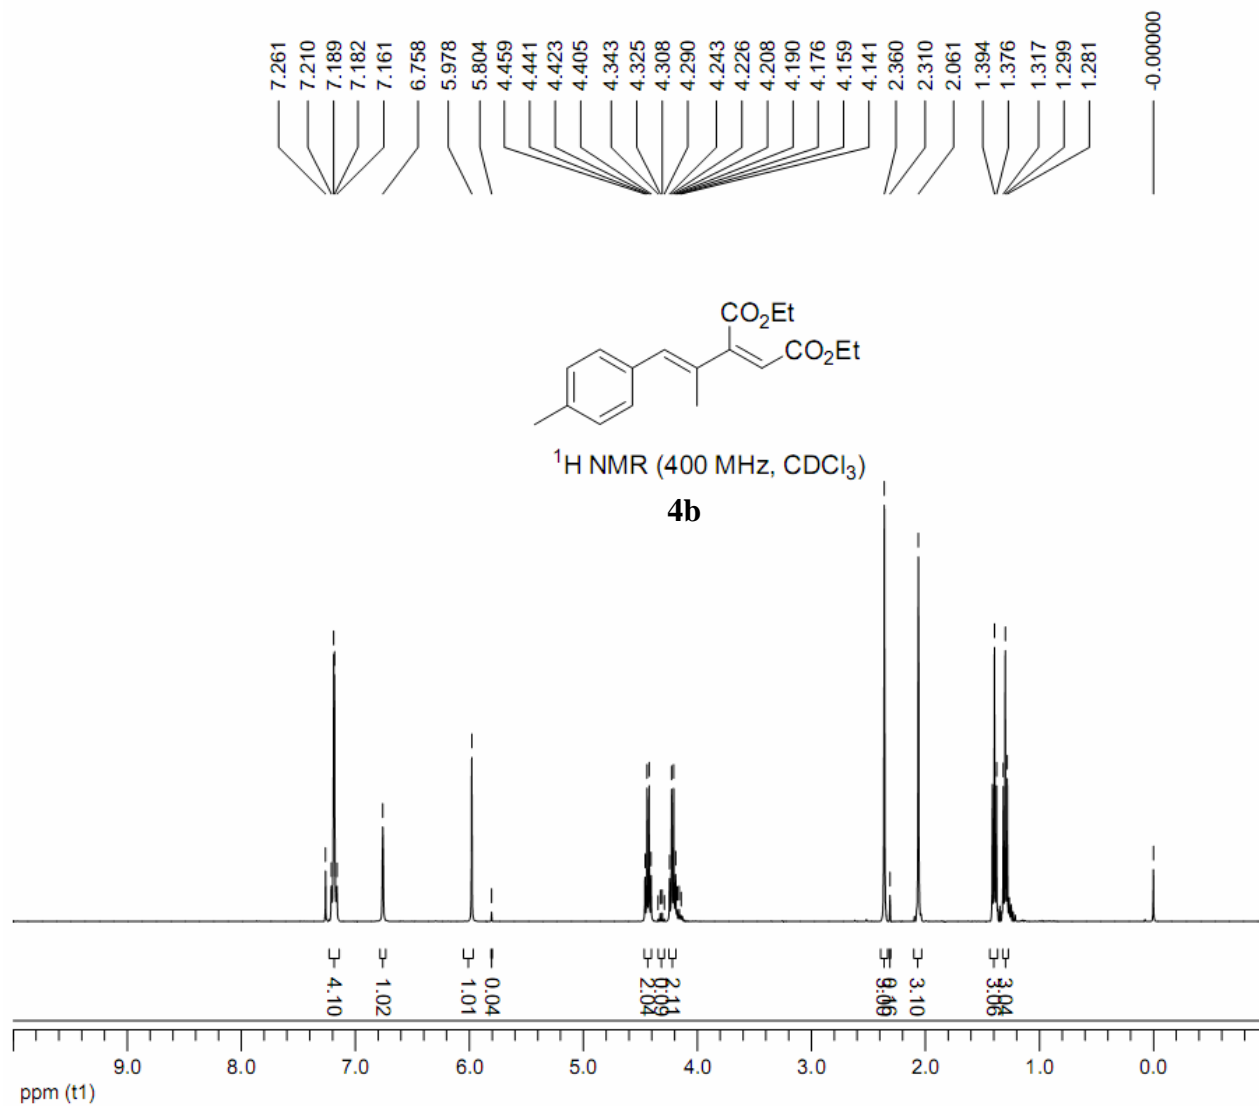

**Date:**  
 15 Jun 2010  
**Document's Title:**  
 p-Me-H.mrc  
**Spectrum Title:**  
 PROTON  
**Frequency (MHz):**  
 (f1) 400.130  
**Original Points Count:**  
 (f1) 32768  
**Actual Points Count:**  
 (f1) 32768  
**Acquisition Time (sec):**  
 (f1) 3.9846  
**Spectral Width (ppm):**  
 (f1) 20.553  
**Pulse Program:**  
 Unknown

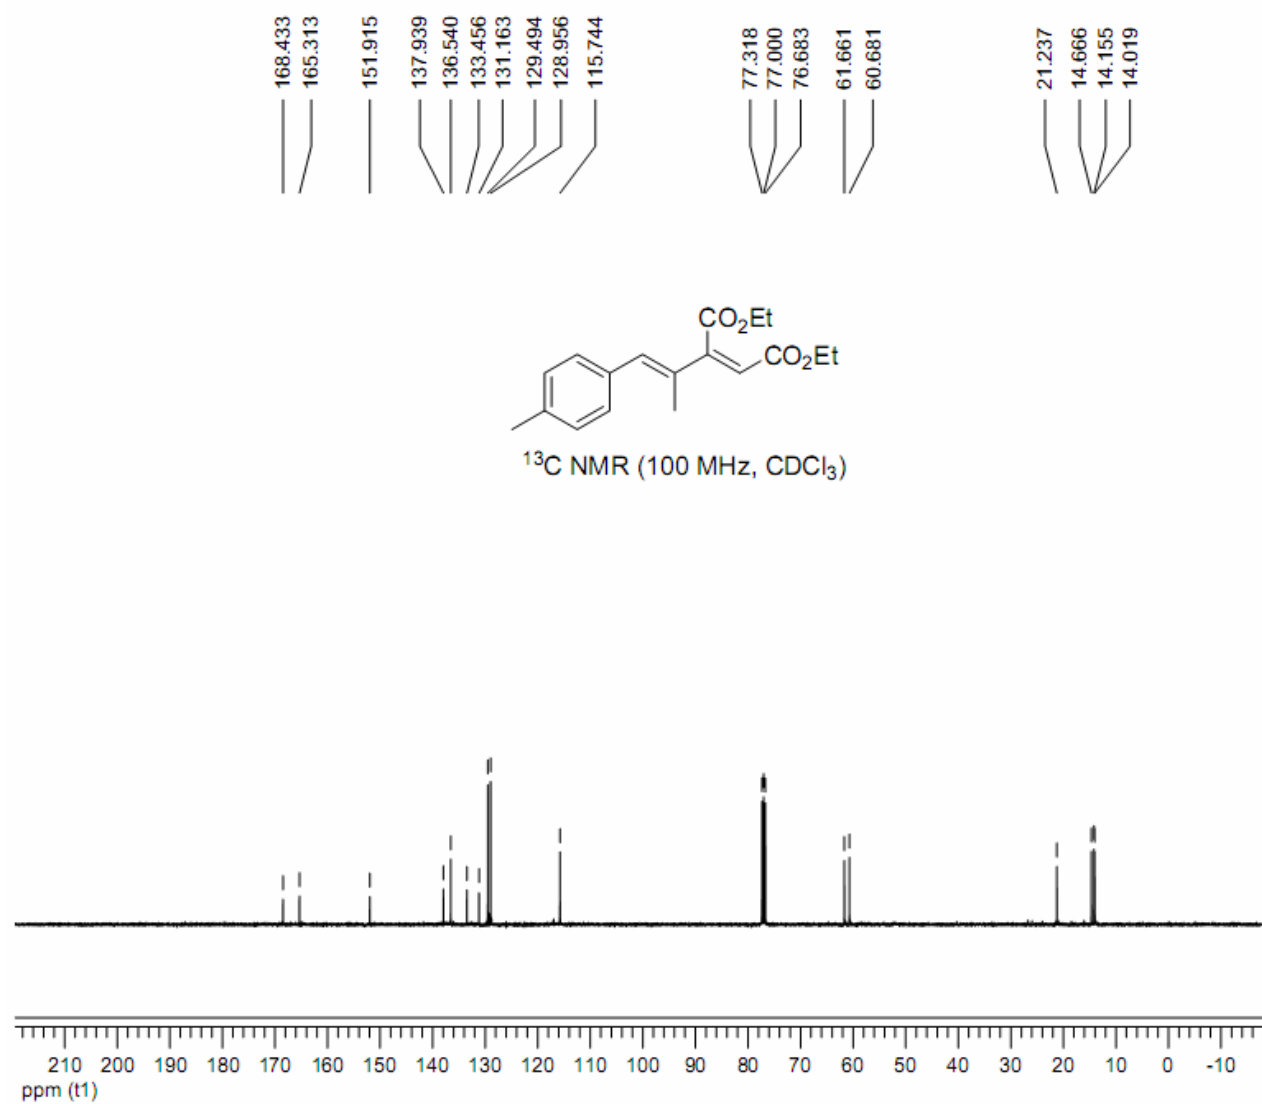

**Date:**  
15 Jun 2010

**Document's Title:**  
p-Me-C.mrc

**Spectrum Title:**  
C13CPD

**Frequency (MHz):**  
(f1) 100.613

**Original Points Count:**  
(f1) 32768

**Actual Points Count:**  
(f1) 32768

**Acquisition Time (sec):**  
(f1) 1.3631

**Spectral Width (ppm):**  
(f1) 238.921

**Pulse Program:**  
Unknown

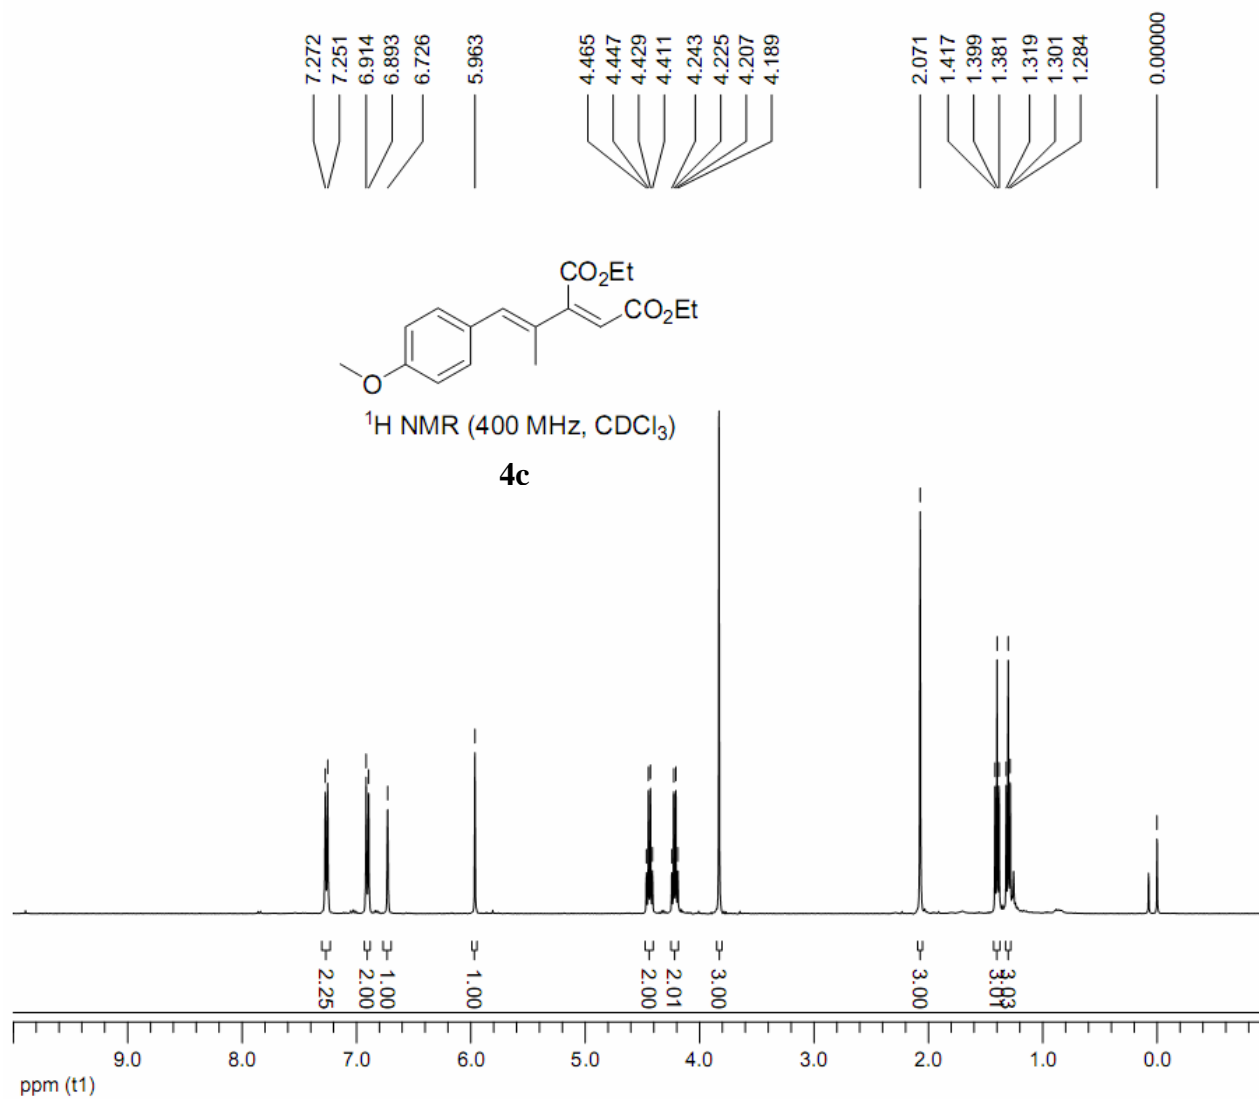

**Date:**  
 15 Jun 2010  
**Document's Title:**  
 p-OMe-H.mrc  
**Spectrum Title:**  
 PROTON  
**Frequency (MHz):**  
 (f1) 400.130  
**Original Points Count:**  
 (f1) 32768  
**Actual Points Count:**  
 (f1) 32768  
**Acquisition Time (sec):**  
 (f1) 3.9846  
**Spectral Width (ppm):**  
 (f1) 20.553  
**Pulse Program:**  
 Unknown

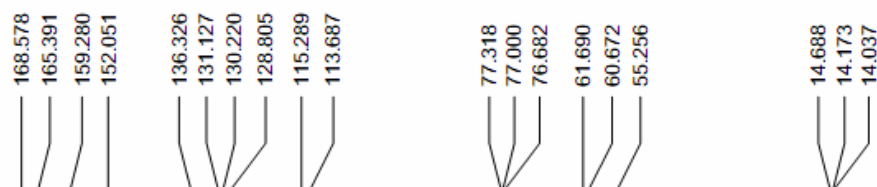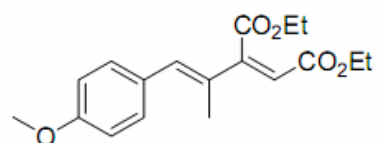

<sup>13</sup>C NMR (100 MHz, CDCl<sub>3</sub>)

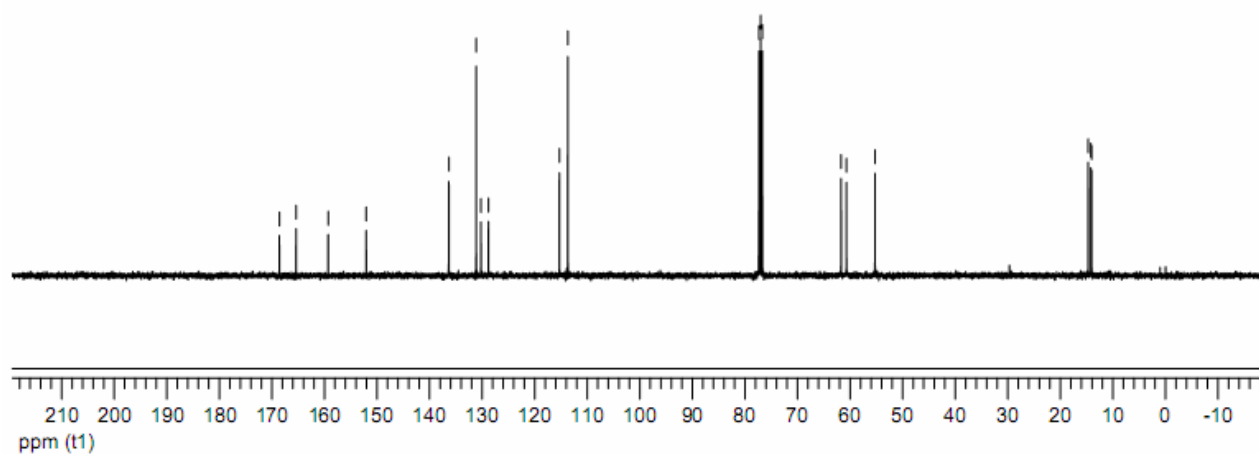

**Date:**  
15 Jun 2010  
**Document's Title:**  
p-OMe-C.mrc  
**Spectrum Title:**  
C13CPD  
**Frequency (MHz):**  
(f1) 100.613  
**Original Points Count:**  
(f1) 32768  
**Actual Points Count:**  
(f1) 32768  
**Acquisition Time (sec):**  
(f1) 1.3631  
**Spectral Width (ppm):**  
(f1) 238.921  
**Pulse Program:**  
Unknown

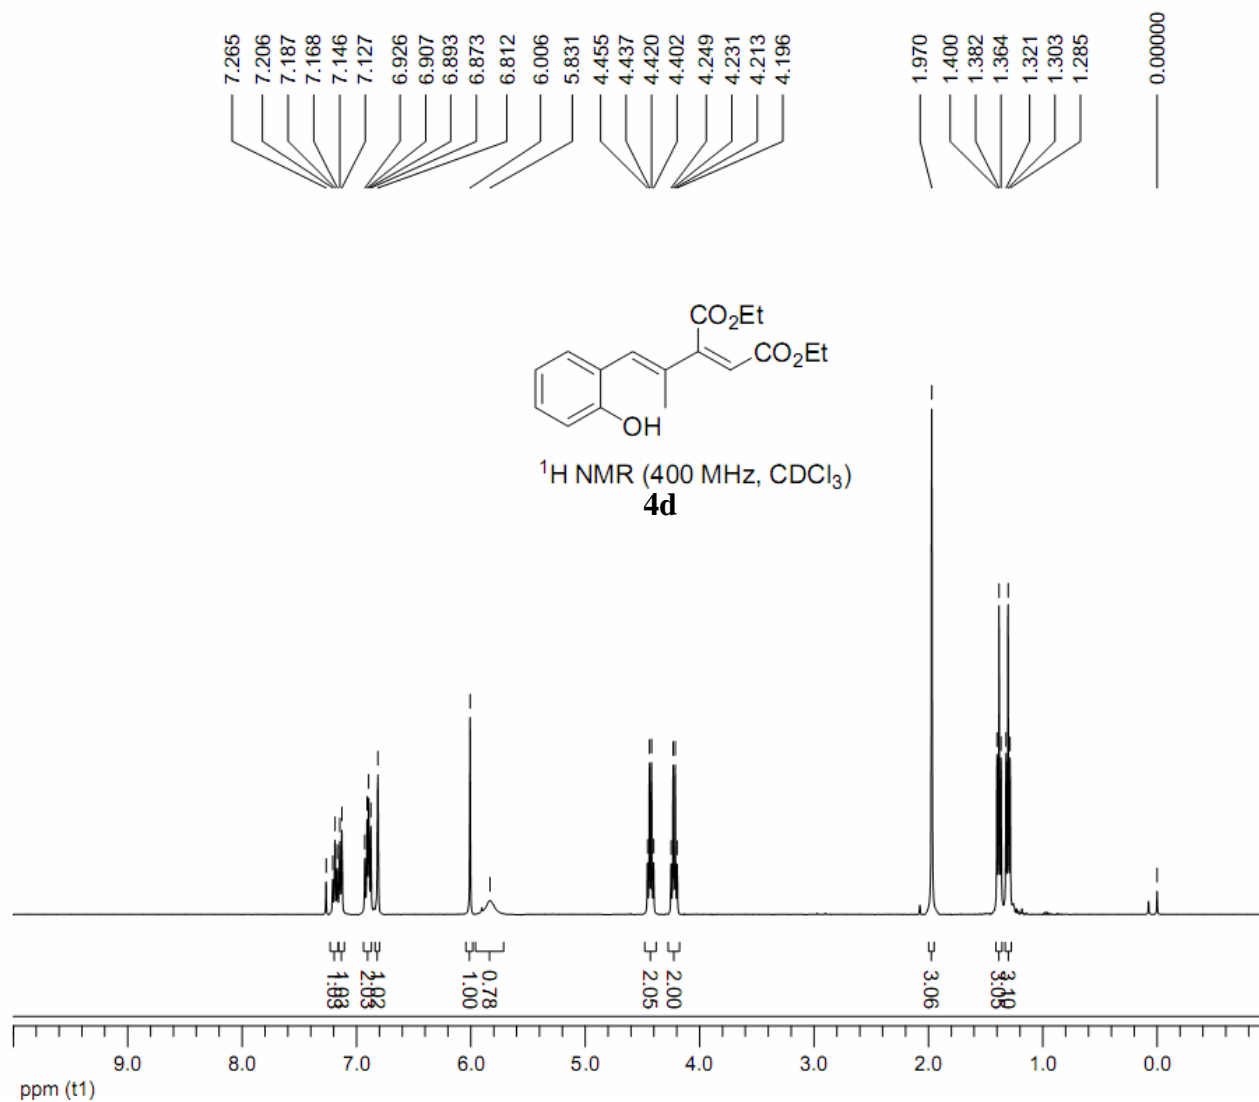

**Date:**  
 15 Jun 2010  
**Document's Title:**  
 2-OH-H.mrc  
**Spectrum Title:**  
 PROTON  
**Frequency (MHz):**  
 (f1) 400.130  
**Original Points Count:**  
 (f1) 32768  
**Actual Points Count:**  
 (f1) 32768  
**Acquisition Time (sec):**  
 (f1) 3.9846  
**Spectral Width (ppm):**  
 (f1) 20.553  
**Pulse Program:**  
 Unknown

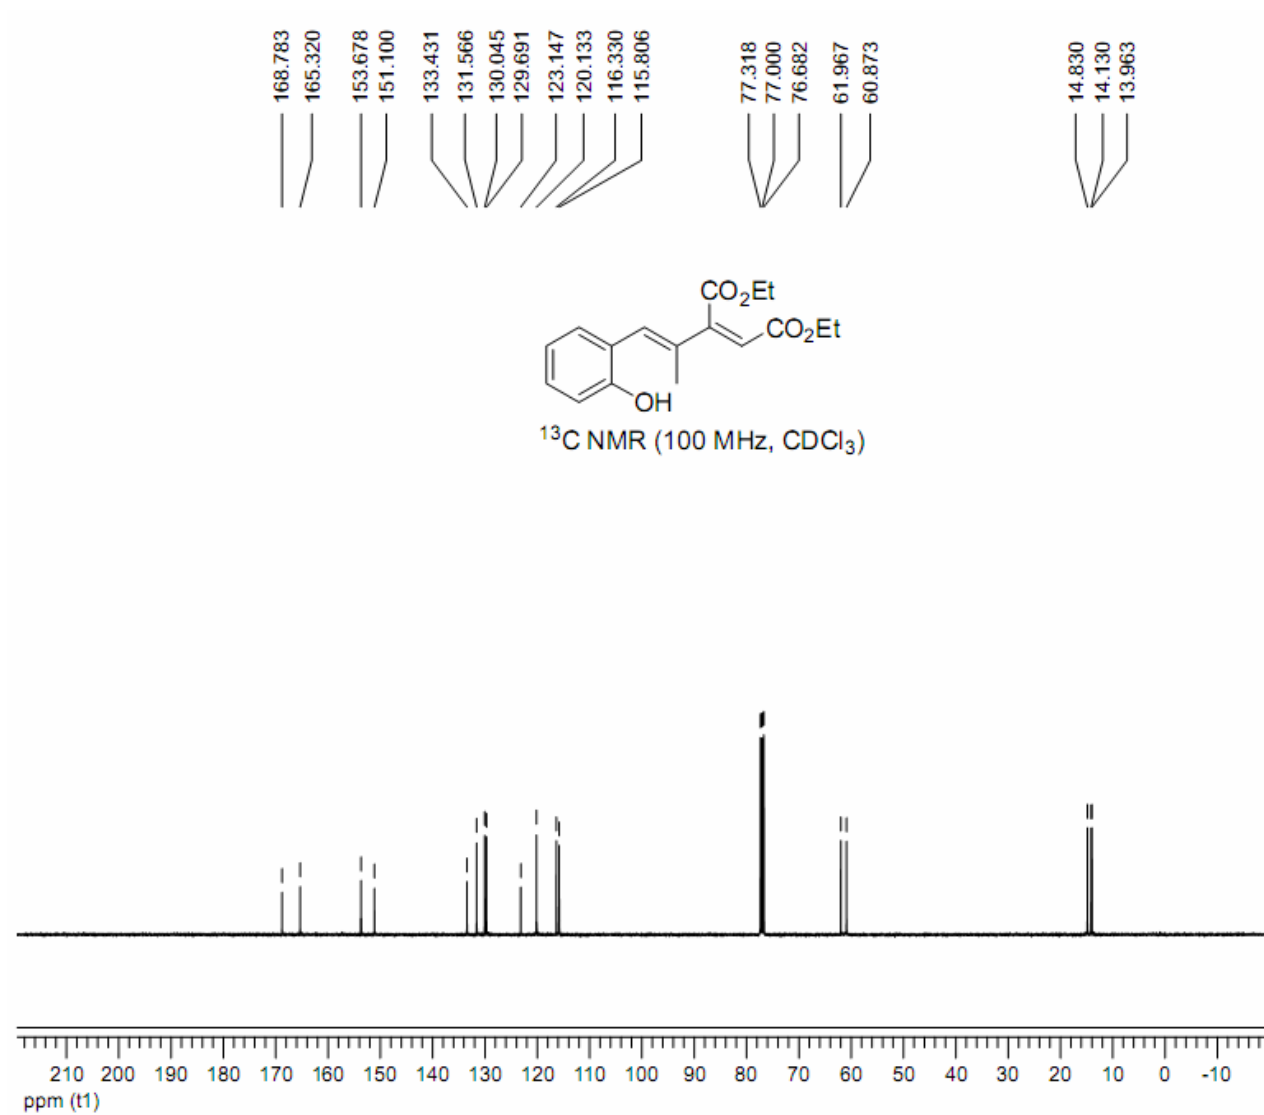

**Date:**  
15 Jun 2010

**Document's Title:**  
2-OH-C.mrc

**Spectrum Title:**  
C13CPD

**Frequency (MHz):**  
(f1) 100.613

**Original Points Count:**  
(f1) 32768

**Actual Points Count:**  
(f1) 32768

**Acquisition Time (sec):**  
(f1) 1.3631

**Spectral Width (ppm):**  
(f1) 238.921

**Pulse Program:**  
Unknown

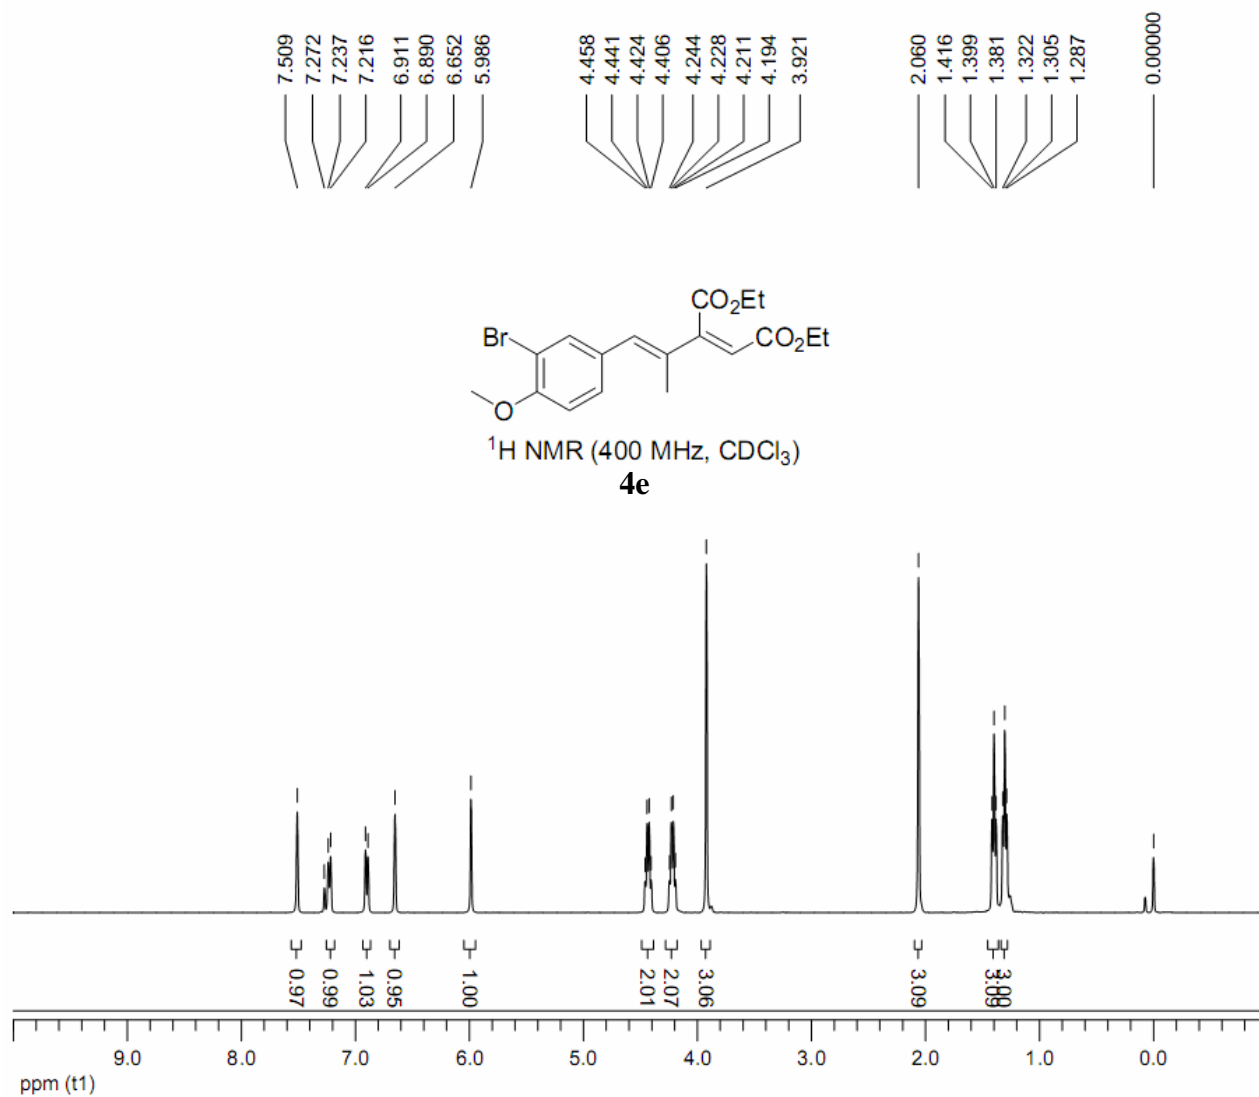

**Date:**  
 15 Jun 2010  
**Document's Title:**  
 3-Br-4-OMe-H.mrc  
**Spectrum Title:**  
 PROTON  
**Frequency (MHz):**  
 (f1) 400.130  
**Original Points Count:**  
 (f1) 32768  
**Actual Points Count:**  
 (f1) 32768  
**Acquisition Time (sec):**  
 (f1) 3.9846  
**Spectral Width (ppm):**  
 (f1) 20.553  
**Pulse Program:**  
 Unknown



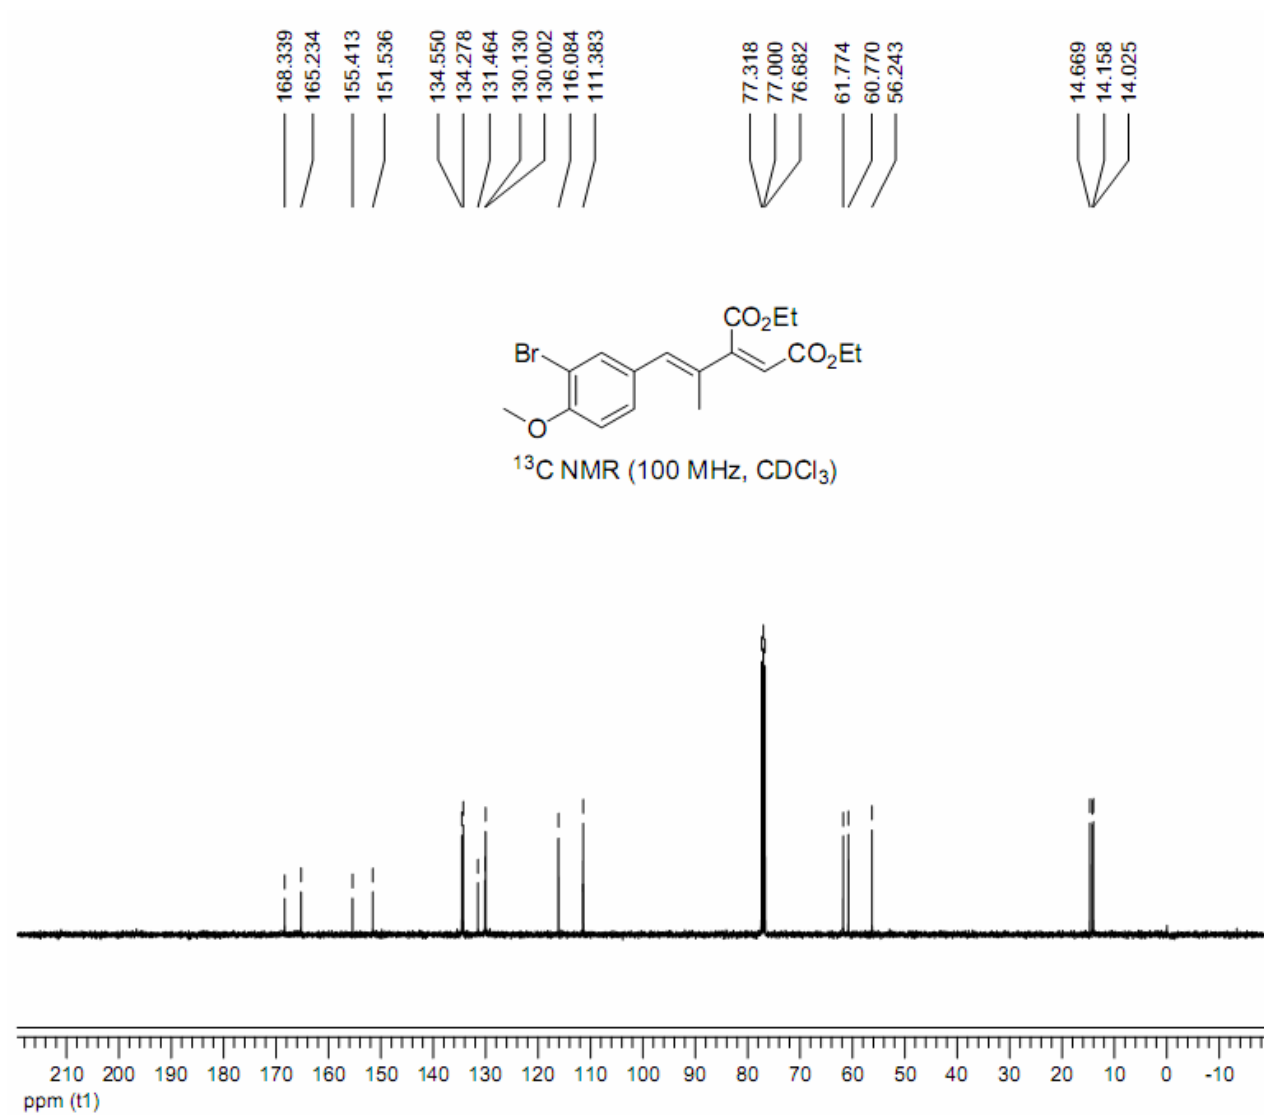

**Date:**  
15 Jun 2010

**Document's Title:**  
3-Br-4-OMe-C.mrc

**Spectrum Title:**  
C13CPD

**Frequency (MHz):**  
(f1) 100.613

**Original Points Count:**  
(f1) 32768

**Actual Points Count:**  
(f1) 32768

**Acquisition Time (sec):**  
(f1) 1.3631

**Spectral Width (ppm):**  
(f1) 238.921

**Pulse Program:**  
Unknown

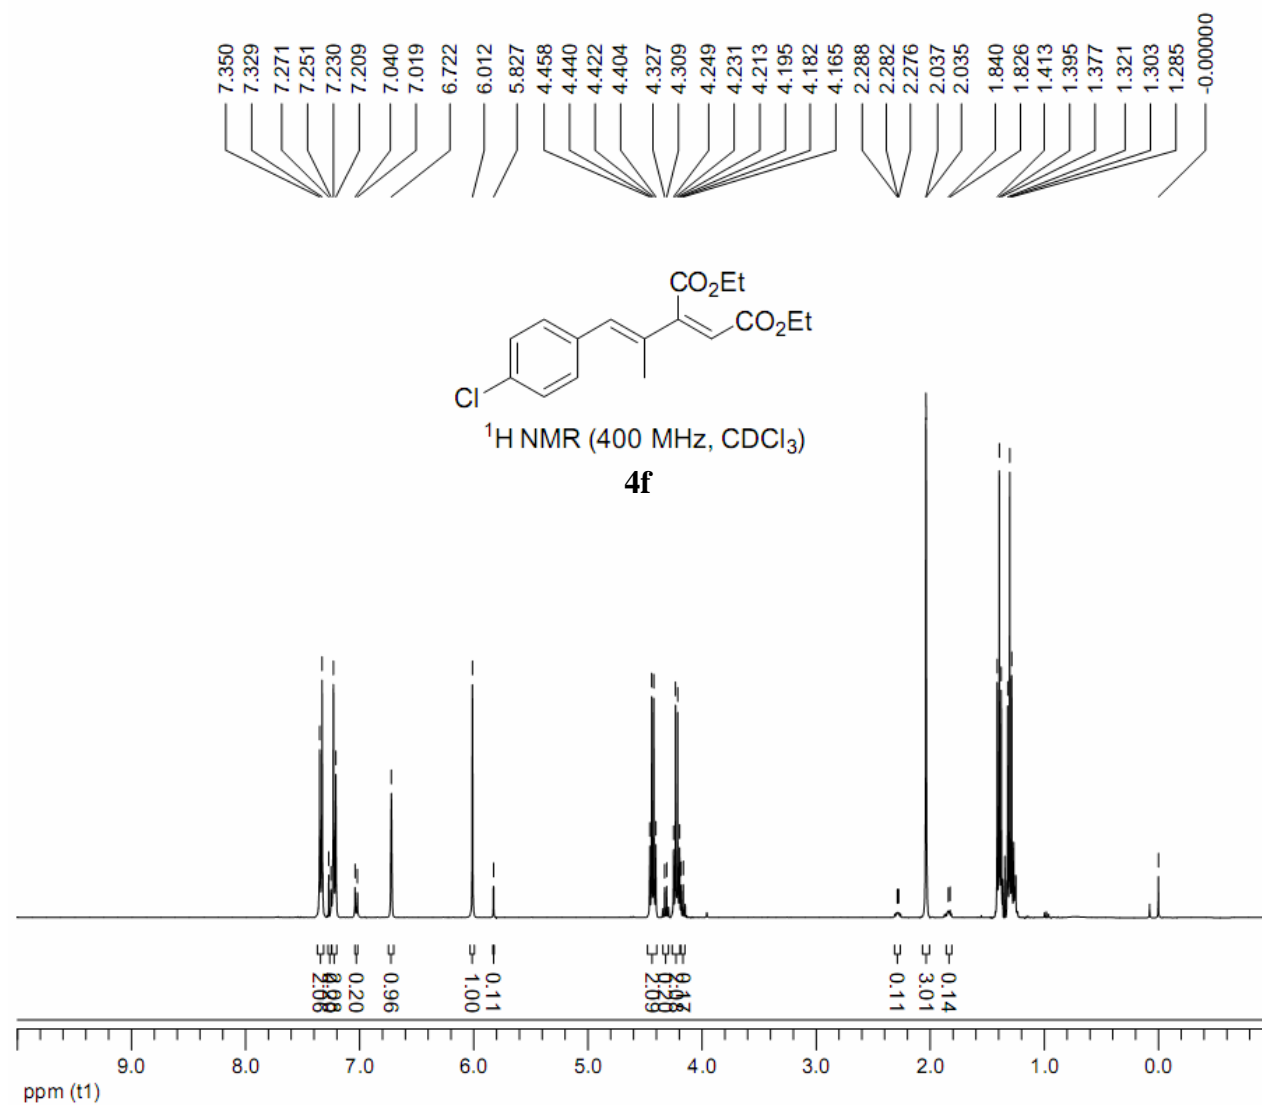

**Date:**  
 15 Jun 2010  
**Document's Title:**  
 p-Cl-H.mrc  
**Spectrum Title:**  
 PROTON  
**Frequency (MHz):**  
 (f1) 400.130  
**Original Points Count:**  
 (f1) 32768  
**Actual Points Count:**  
 (f1) 32768  
**Acquisition Time (sec):**  
 (f1) 3.9846  
**Spectral Width (ppm):**  
 (f1) 20.553  
**Pulse Program:**  
 Unknown

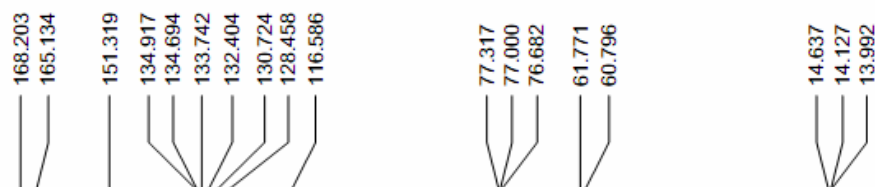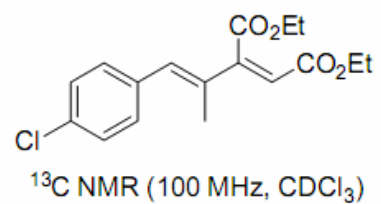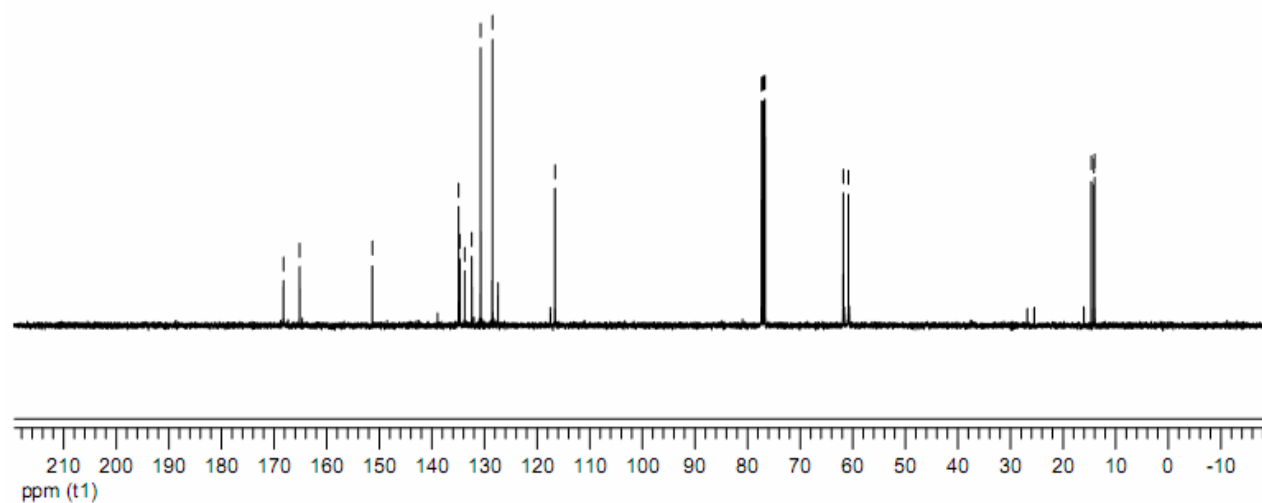

**Date:**  
15 Jun 2010

**Document's Title:**  
p-Cl-C.mrc

**Spectrum Title:**  
C13CPD

**Frequency (MHz):**  
(f1) 100.613

**Original Points Count:**  
(f1) 32768

**Actual Points Count:**  
(f1) 32768

**Acquisition Time (sec):**  
(f1) 1.3631

**Spectral Width (ppm):**  
(f1) 238.921

**Pulse Program:**  
Unknown

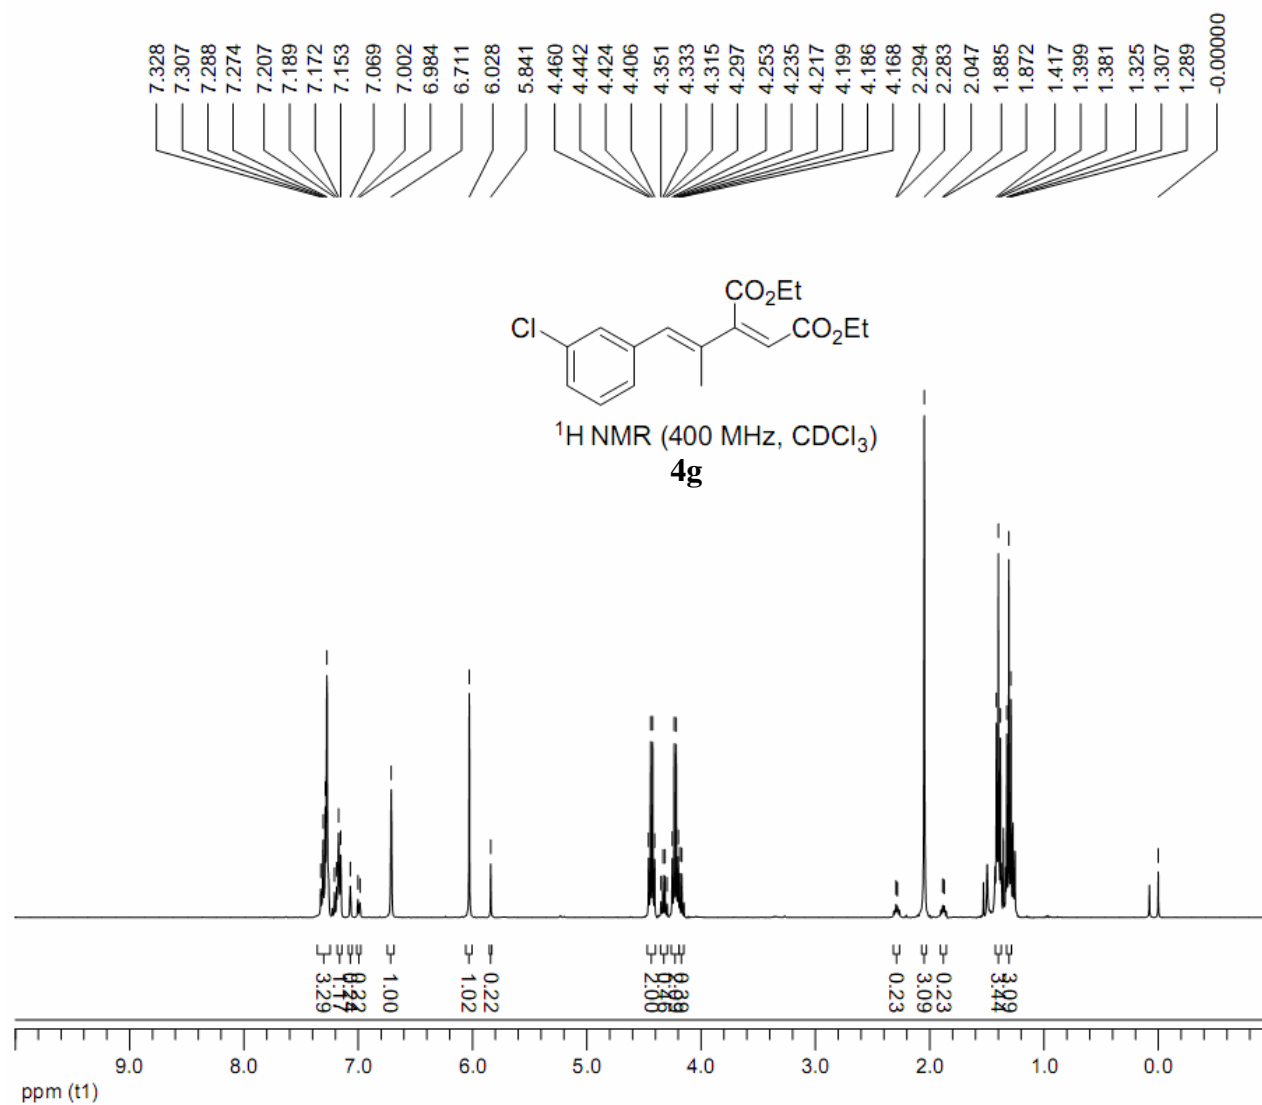

**Date:**  
 15 Jun 2010  
**Document's Title:**  
 m-Cl-H.mrc  
**Spectrum Title:**  
 PROTON  
**Frequency (MHz):**  
 (f1) 400.130  
**Original Points Count:**  
 (f1) 32768  
**Actual Points Count:**  
 (f1) 32768  
**Acquisition Time (sec):**  
 (f1) 3.9846  
**Spectral Width (ppm):**  
 (f1) 20.553  
**Pulse Program:**  
 Unknown

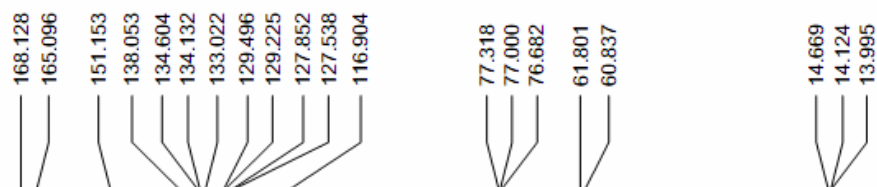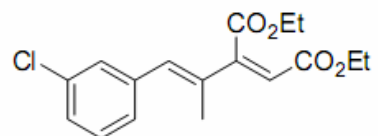

<sup>13</sup>C NMR (100 MHz, CDCl<sub>3</sub>)

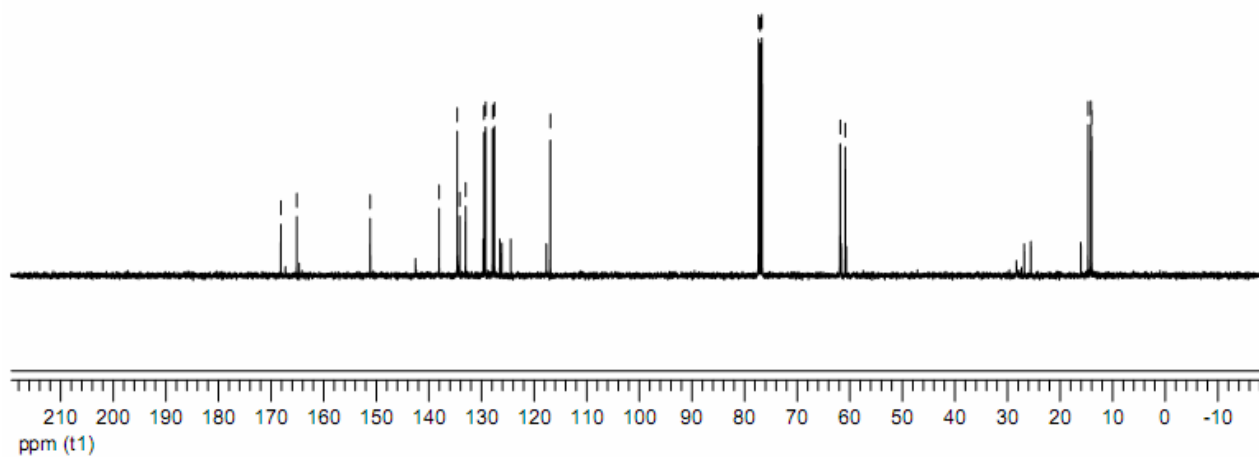

**Date:**  
15 Jun 2010  
**Document's Title:**  
m-Cl-C.mrc  
**Spectrum Title:**  
C13CPD  
**Frequency (MHz):**  
(f1) 100.613  
**Original Points Count:**  
(f1) 32768  
**Actual Points Count:**  
(f1) 32768  
**Acquisition Time (sec):**  
(f1) 1.3631  
**Spectral Width (ppm):**  
(f1) 238.921  
**Pulse Program:**  
Unknown

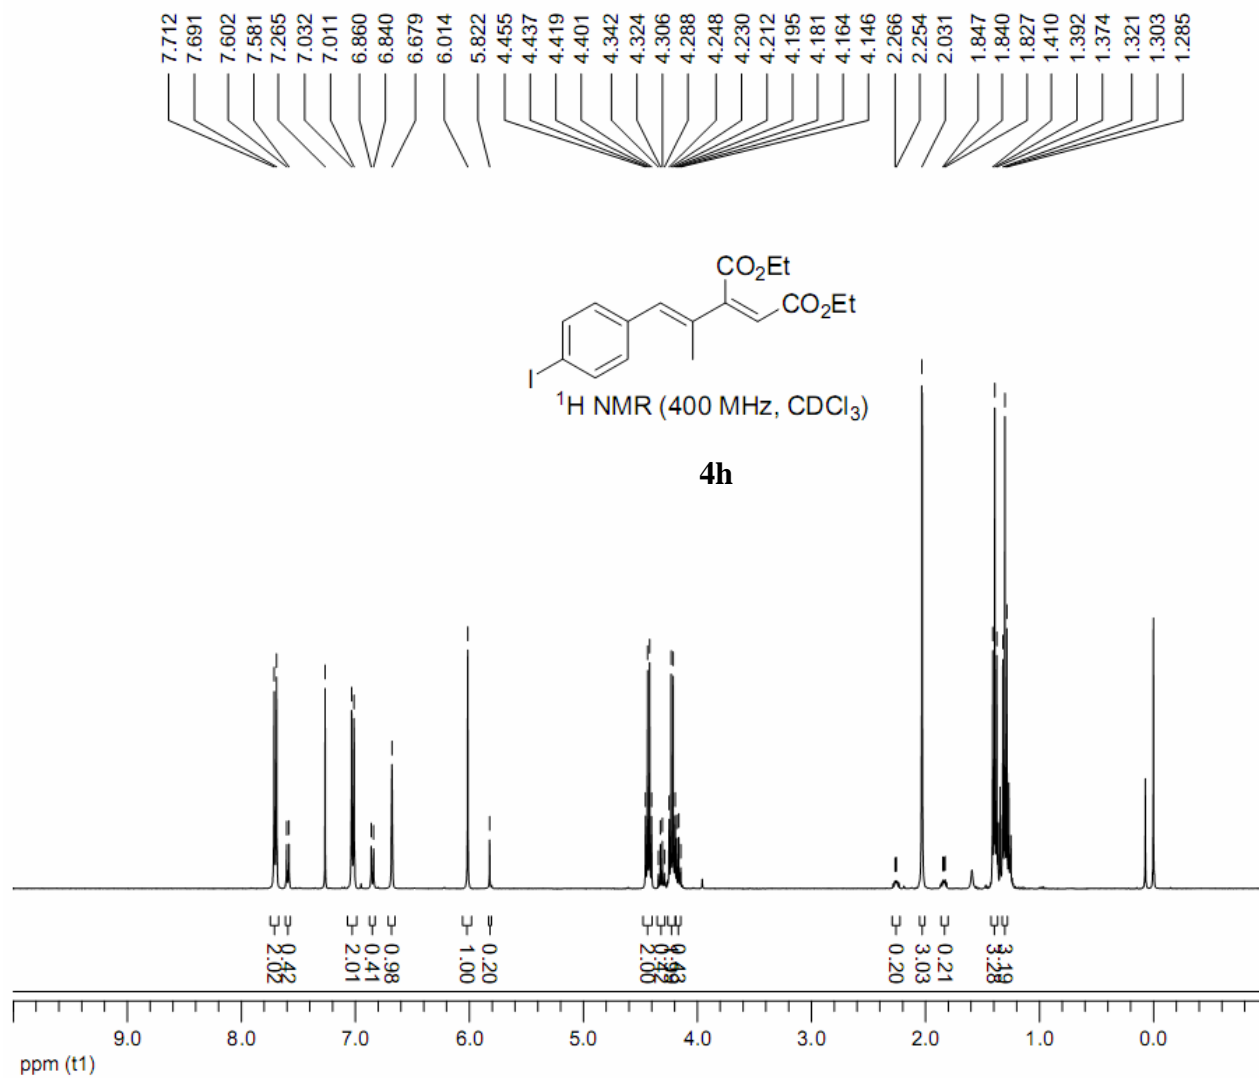

**Date:**  
 15 Jun 2010  
**Document's Title:**  
 p-l-H.mrc  
**Spectrum Title:**  
 PROTON  
**Frequency (MHz):**  
 (f1) 400.130  
**Original Points Count:**  
 (f1) 32768  
**Actual Points Count:**  
 (f1) 32768  
**Acquisition Time (sec):**  
 (f1) 3.9846  
**Spectral Width (ppm):**  
 (f1) 20.553  
**Pulse Program:**  
 Unknown

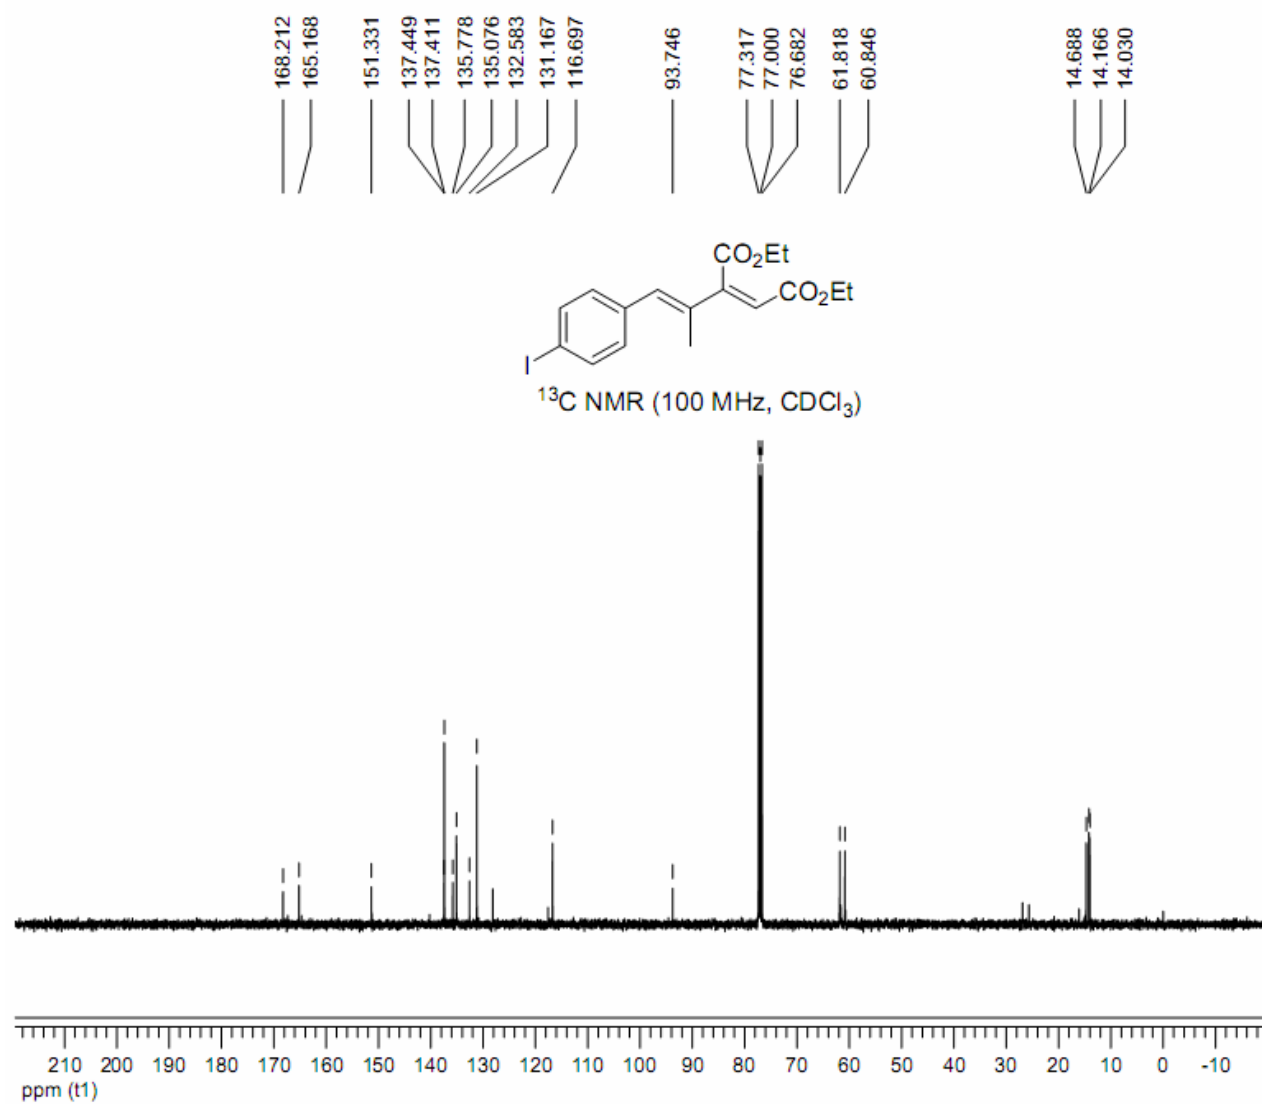

**Date:**  
15 Jun 2010

**Document's Title:**  
p-I-C.mrc

**Spectrum Title:**  
C13CPD

**Frequency (MHz):**  
(f1) 100.613

**Original Points Count:**  
(f1) 32768

**Actual Points Count:**  
(f1) 32768

**Acquisition Time (sec):**  
(f1) 1.3631

**Spectral Width (ppm):**  
(f1) 238.921

**Pulse Program:**  
Unknown

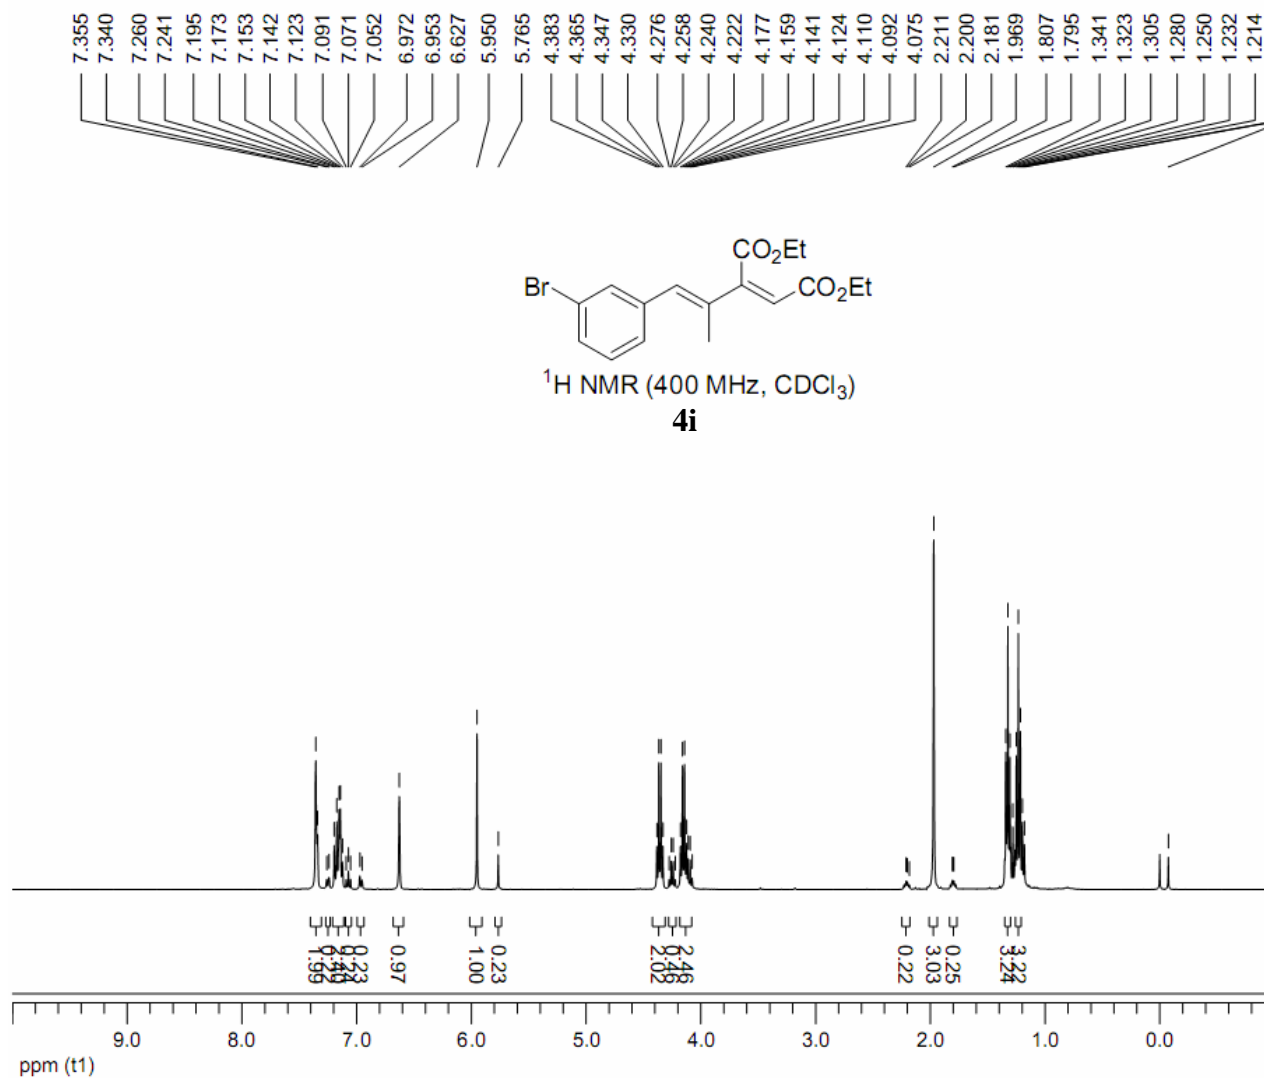

**Date:**  
 15 Jun 2010  
**Document's Title:**  
 m-Br-H.mrc  
**Spectrum Title:**  
 PROTON  
**Frequency (MHz):**  
 (f1) 400.130  
**Original Points Count:**  
 (f1) 32768  
**Actual Points Count:**  
 (f1) 32768  
**Acquisition Time (sec):**  
 (f1) 3.9846  
**Spectral Width (ppm):**  
 (f1) 20.553  
**Pulse Program:**  
 Unknown



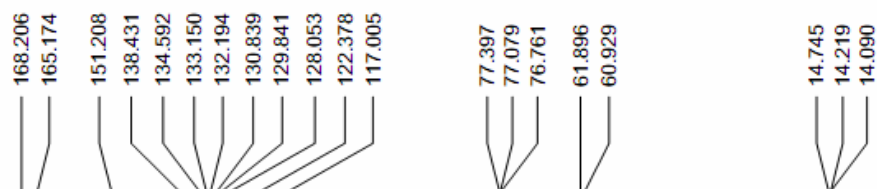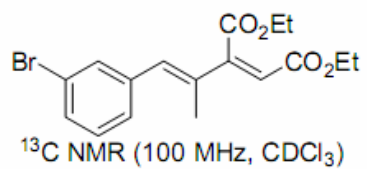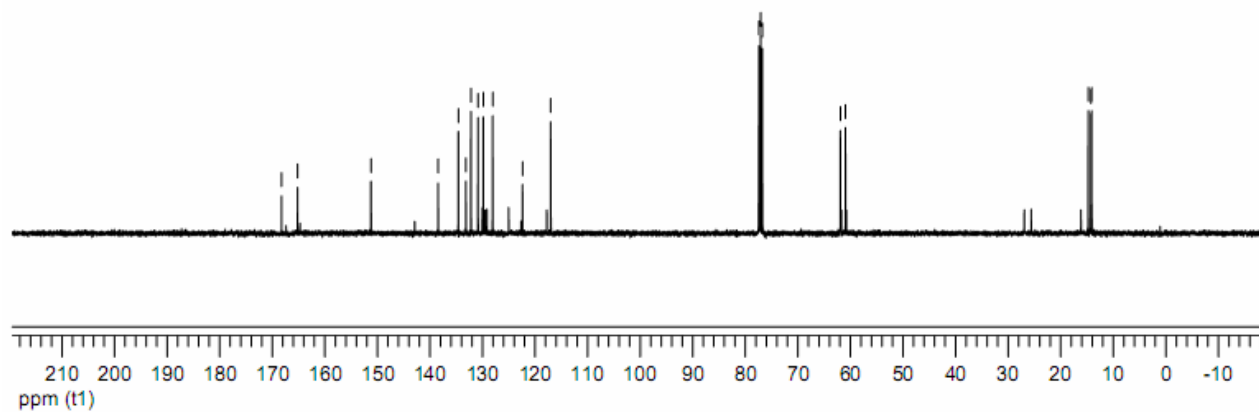

**Date:**  
 15 Jun 2010  
**Document's Title:**  
 m-Br-C.mrc  
**Spectrum Title:**  
 C13CPD  
**Frequency (MHz):**  
 (f1) 100.613  
**Original Points Count:**  
 (f1) 32768  
**Actual Points Count:**  
 (f1) 32768  
**Acquisition Time (sec):**  
 (f1) 1.3631  
**Spectral Width (ppm):**  
 (f1) 238.921  
**Pulse Program:**  
 Unknown

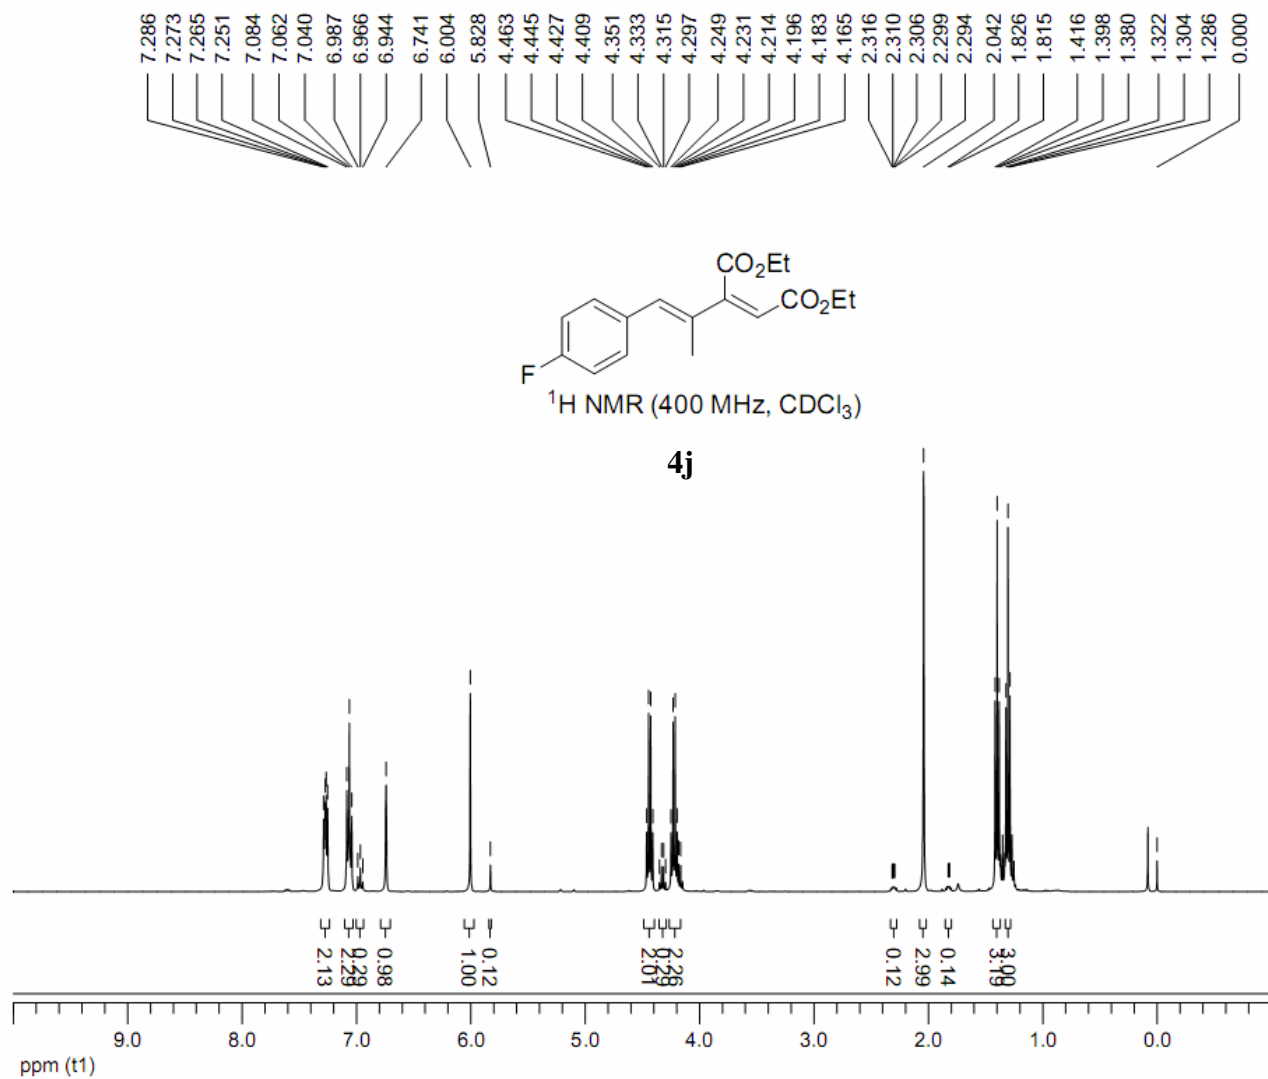

**Date:**  
 15 Jun 2010  
**Document's Title:**  
 p-F-H.mrc  
**Spectrum Title:**  
 PROTON  
**Frequency (MHz):**  
 (f1) 400.130  
**Original Points Count:**  
 (f1) 32768  
**Actual Points Count:**  
 (f1) 32768  
**Acquisition Time (sec):**  
 (f1) 3.9846  
**Spectral Width (ppm):**  
 (f1) 20.553  
**Pulse Program:**  
 Unknown

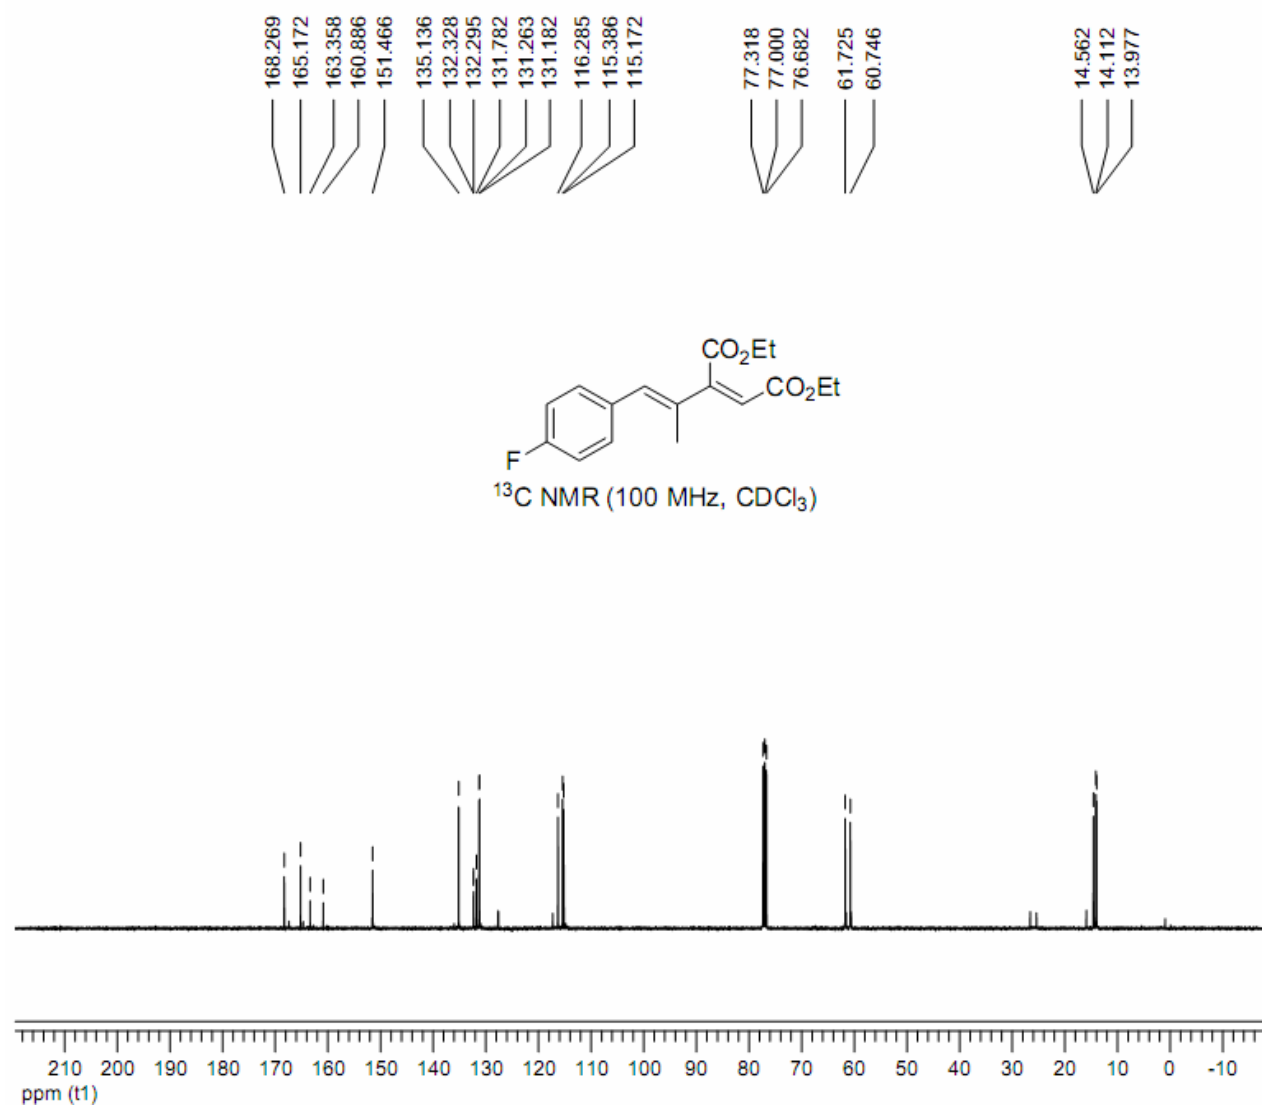

**Date:**  
 15 Jun 2010  
**Document's Title:**  
 p-F-C.mrc  
**Spectrum Title:**  
 C13CPD  
**Frequency (MHz):**  
 (f1) 100.613  
**Original Points Count:**  
 (f1) 32768  
**Actual Points Count:**  
 (f1) 32768  
**Acquisition Time (sec):**  
 (f1) 1.3631  
**Spectral Width (ppm):**  
 (f1) 238.920  
**Pulse Program:**  
 Unknown

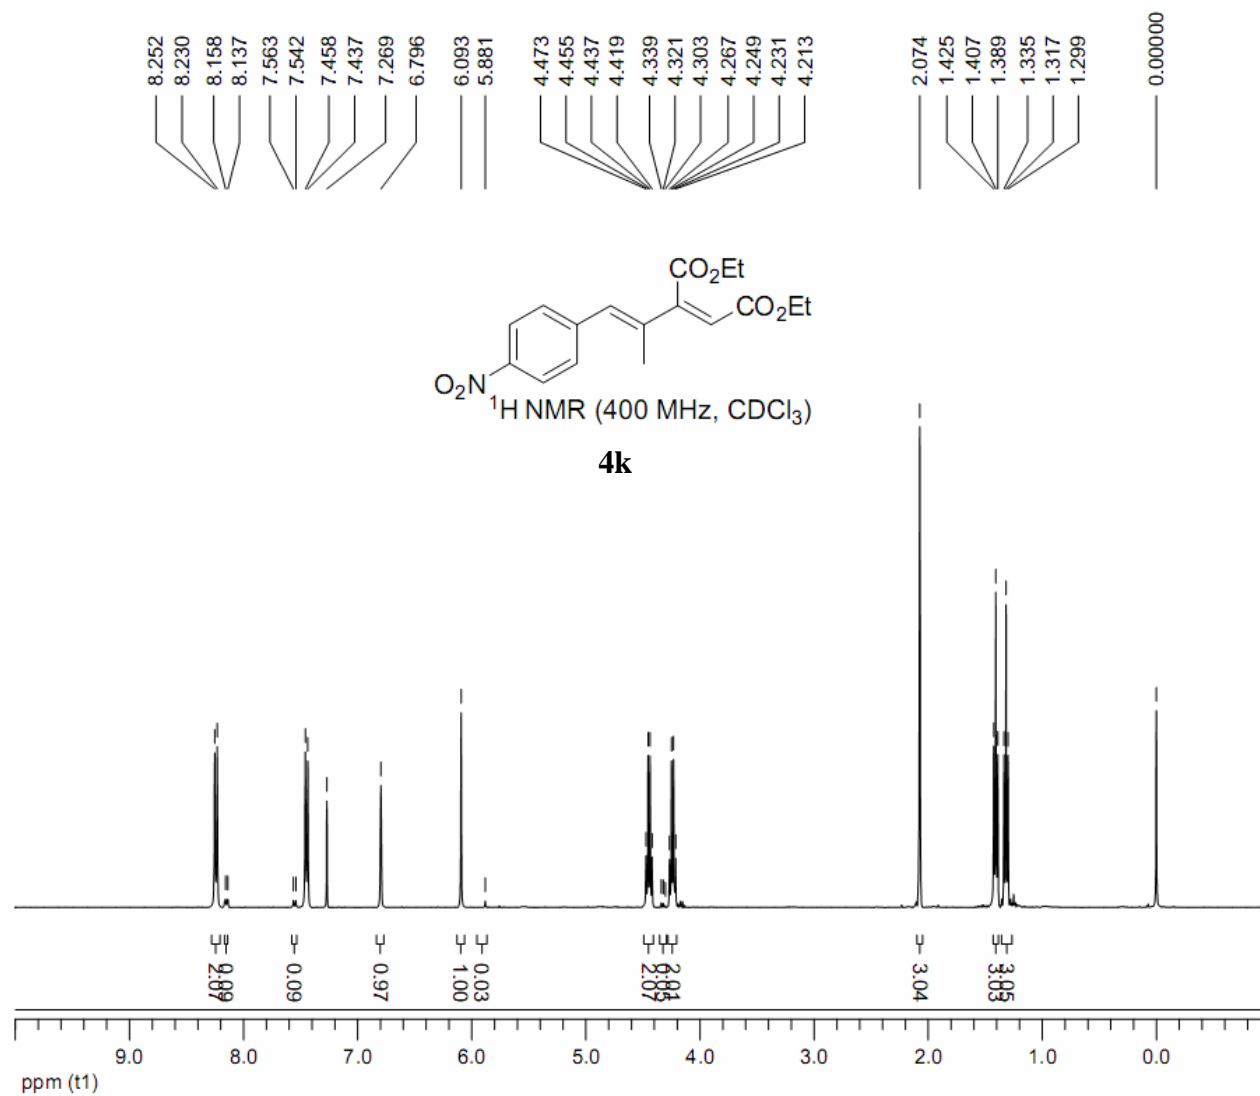

**Date:**  
 15 Jun 2010  
**Document's Title:**  
 p-NO2-H.mrc  
**Spectrum Title:**  
 PROTON  
**Frequency (MHz):**  
 (f1) 400.130  
**Original Points Count:**  
 (f1) 32768  
**Actual Points Count:**  
 (f1) 32768  
**Acquisition Time (sec):**  
 (f1) 3.9846  
**Spectral Width (ppm):**  
 (f1) 20.553  
**Pulse Program:**  
 Unknown

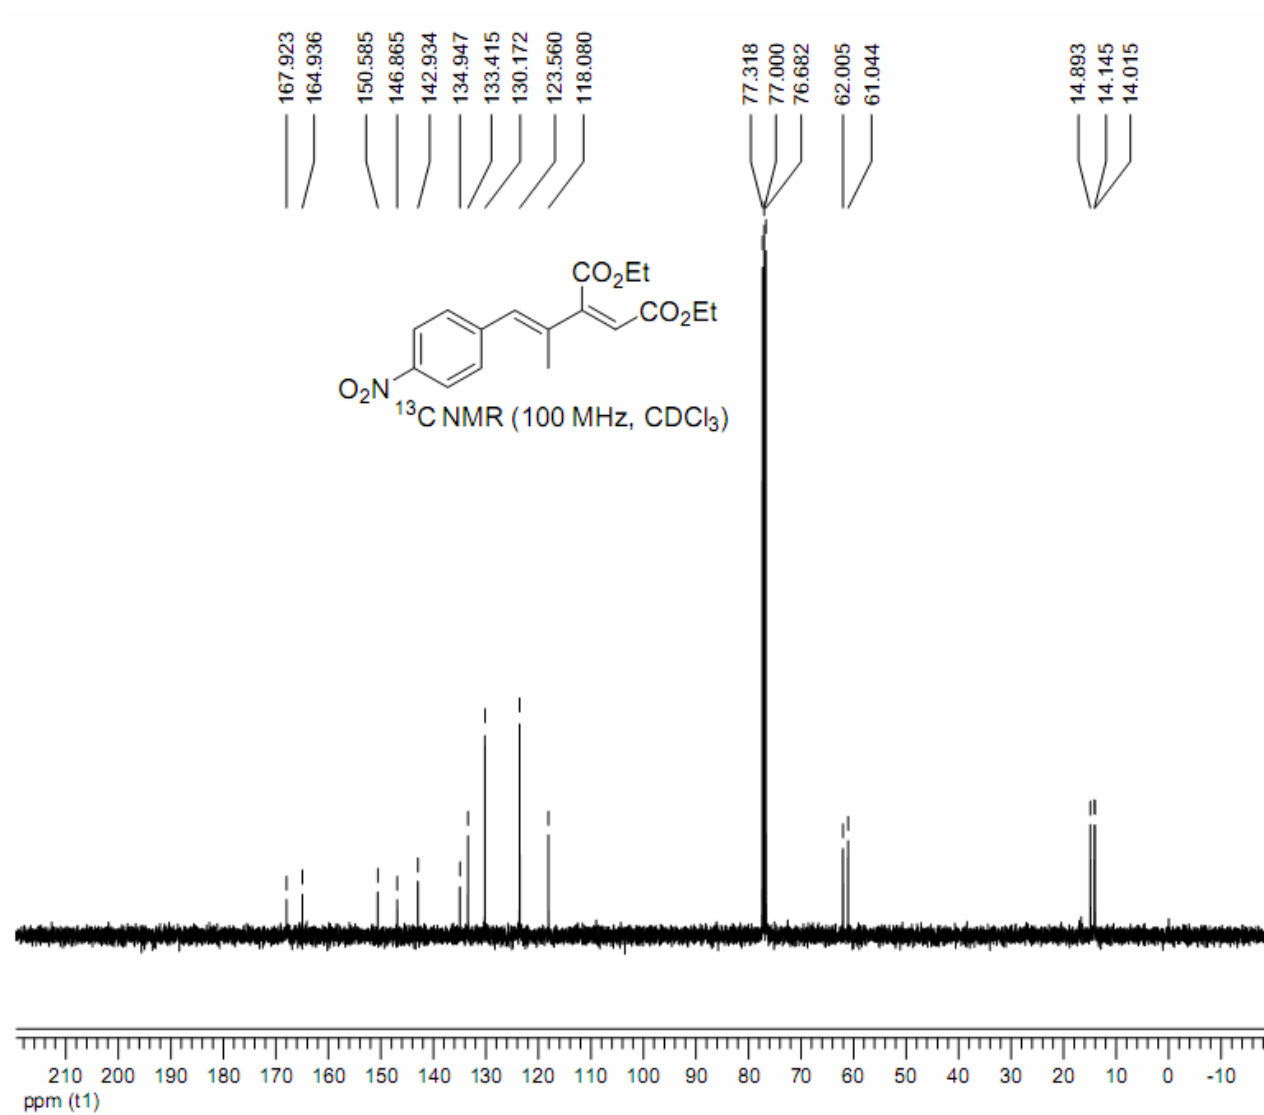

**Date:**  
15 Jun 2010

**Document's Title:**  
p-NO2-C.mrc

**Spectrum Title:**  
C13CPD

**Frequency (MHz):**  
(f1) 100.613

**Original Points Count:**  
(f1) 32768

**Actual Points Count:**  
(f1) 32768

**Acquisition Time (sec):**  
(f1) 1.3631

**Spectral Width (ppm):**  
(f1) 238.921

**Pulse Program:**  
Unknown

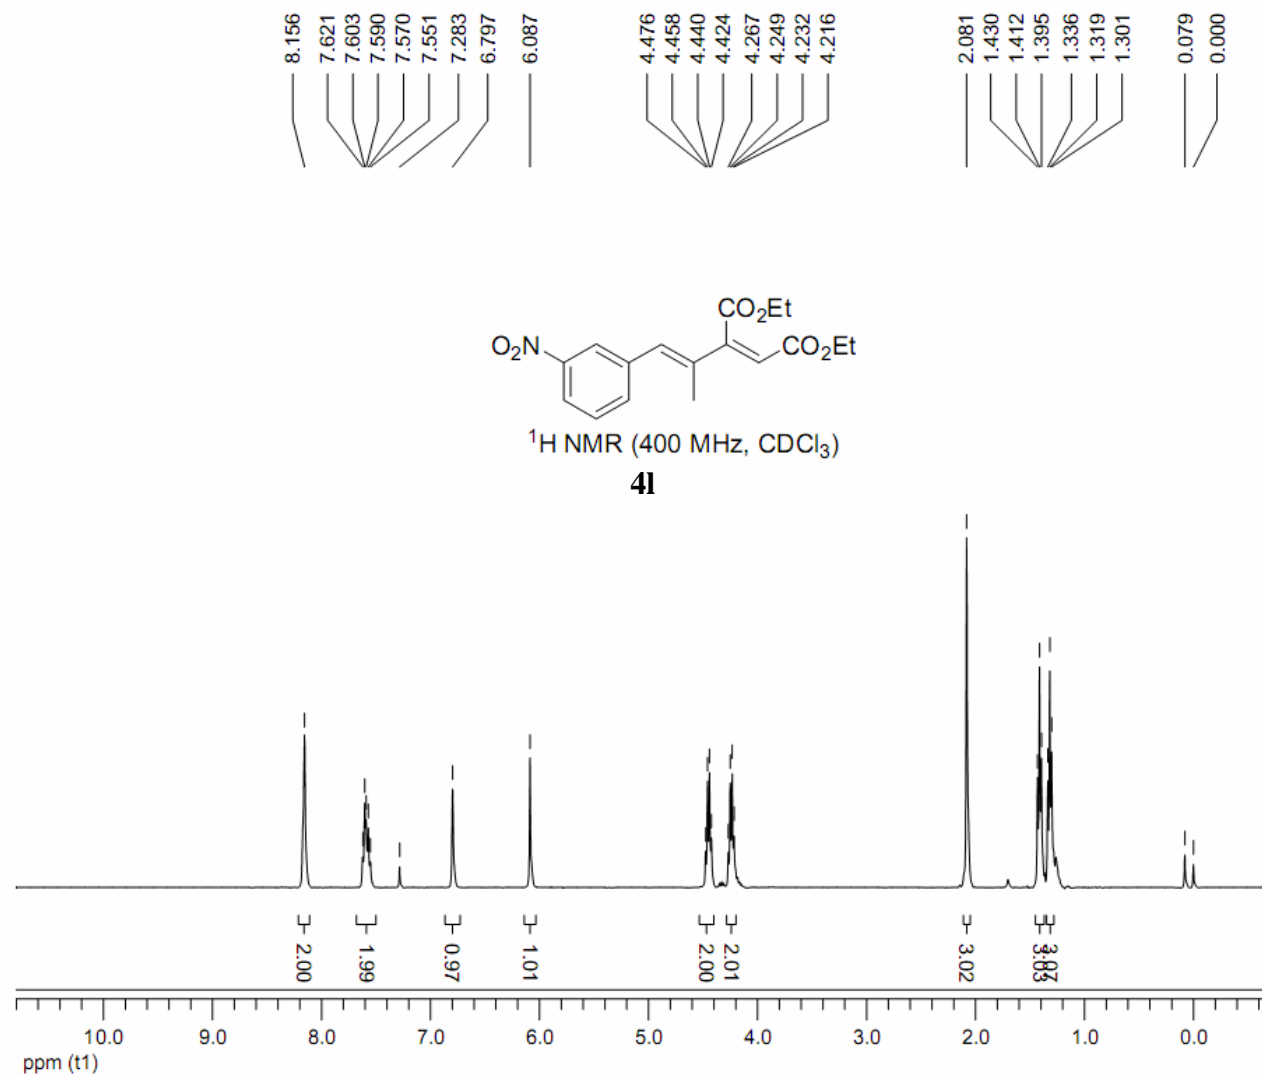

**Date:**  
 16 Jun 2010  
**Document's Title:**  
 m-NO2-H.mrc  
**Spectrum Title:**  
 PROTON  
**Frequency (MHz):**  
 (f1) 400.130  
**Original Points Count:**  
 (f1) 32768  
**Actual Points Count:**  
 (f1) 32768  
**Acquisition Time (sec):**  
 (f1) 3.9846  
**Spectral Width (ppm):**  
 (f1) 20.553  
**Pulse Program:**  
 Unknown

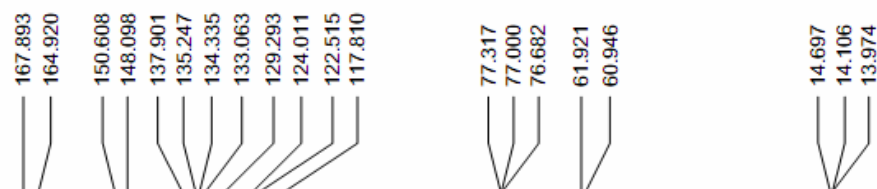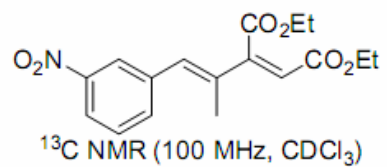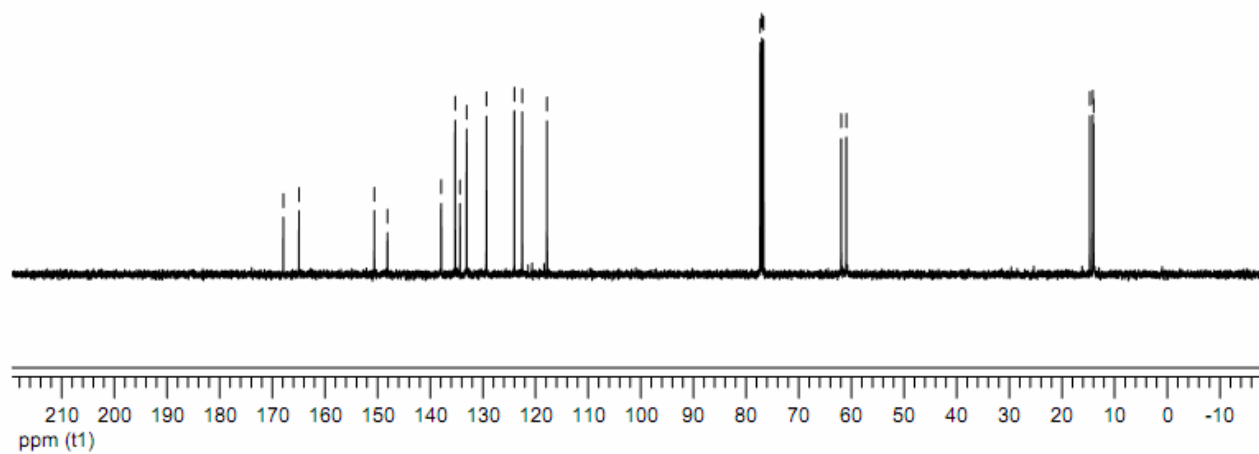

**Date:**  
16 Jun 2010

**Document's Title:**  
m-NO2-C.mrc

**Spectrum Title:**  
C13CPD

**Frequency (MHz):**  
(f1) 100.613

**Original Points Count:**  
(f1) 32768

**Actual Points Count:**  
(f1) 32768

**Acquisition Time (sec):**  
(f1) 1.3631

**Spectral Width (ppm):**  
(f1) 238.921

**Pulse Program:**  
Unknown

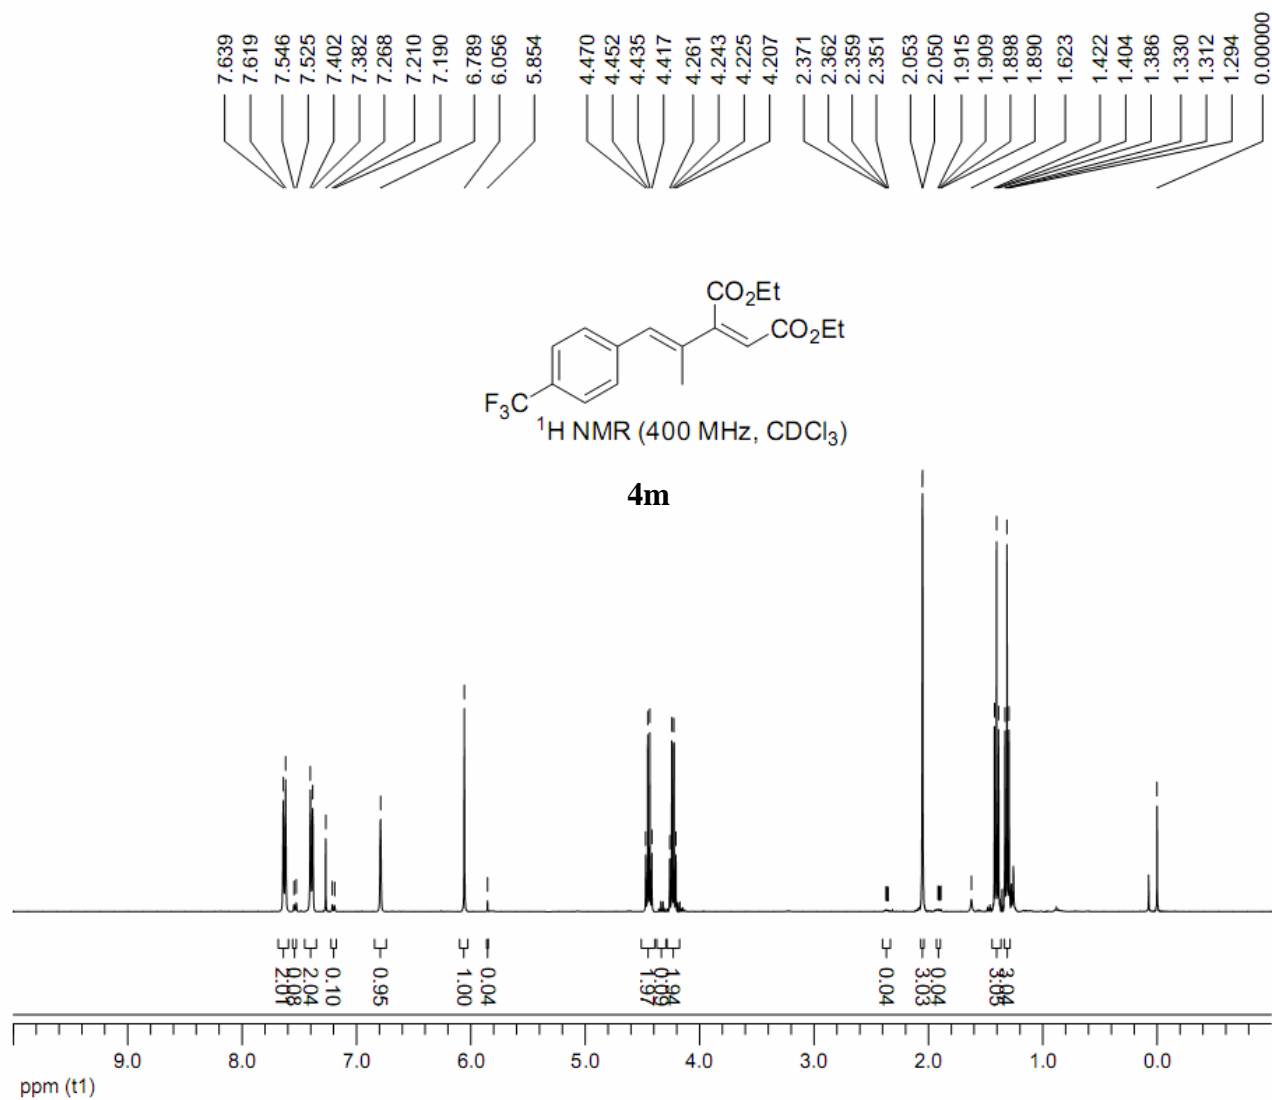

**Date:**  
 16 Jun 2010  
**Document's Title:**  
 p-CF3-H.mrc  
**Spectrum Title:**  
 PROTON  
**Frequency (MHz):**  
 (f1) 400.130  
**Original Points Count:**  
 (f1) 32768  
**Actual Points Count:**  
 (f1) 32768  
**Acquisition Time (sec):**  
 (f1) 3.9846  
**Spectral Width (ppm):**  
 (f1) 20.553  
**Pulse Program:**  
 Unknown



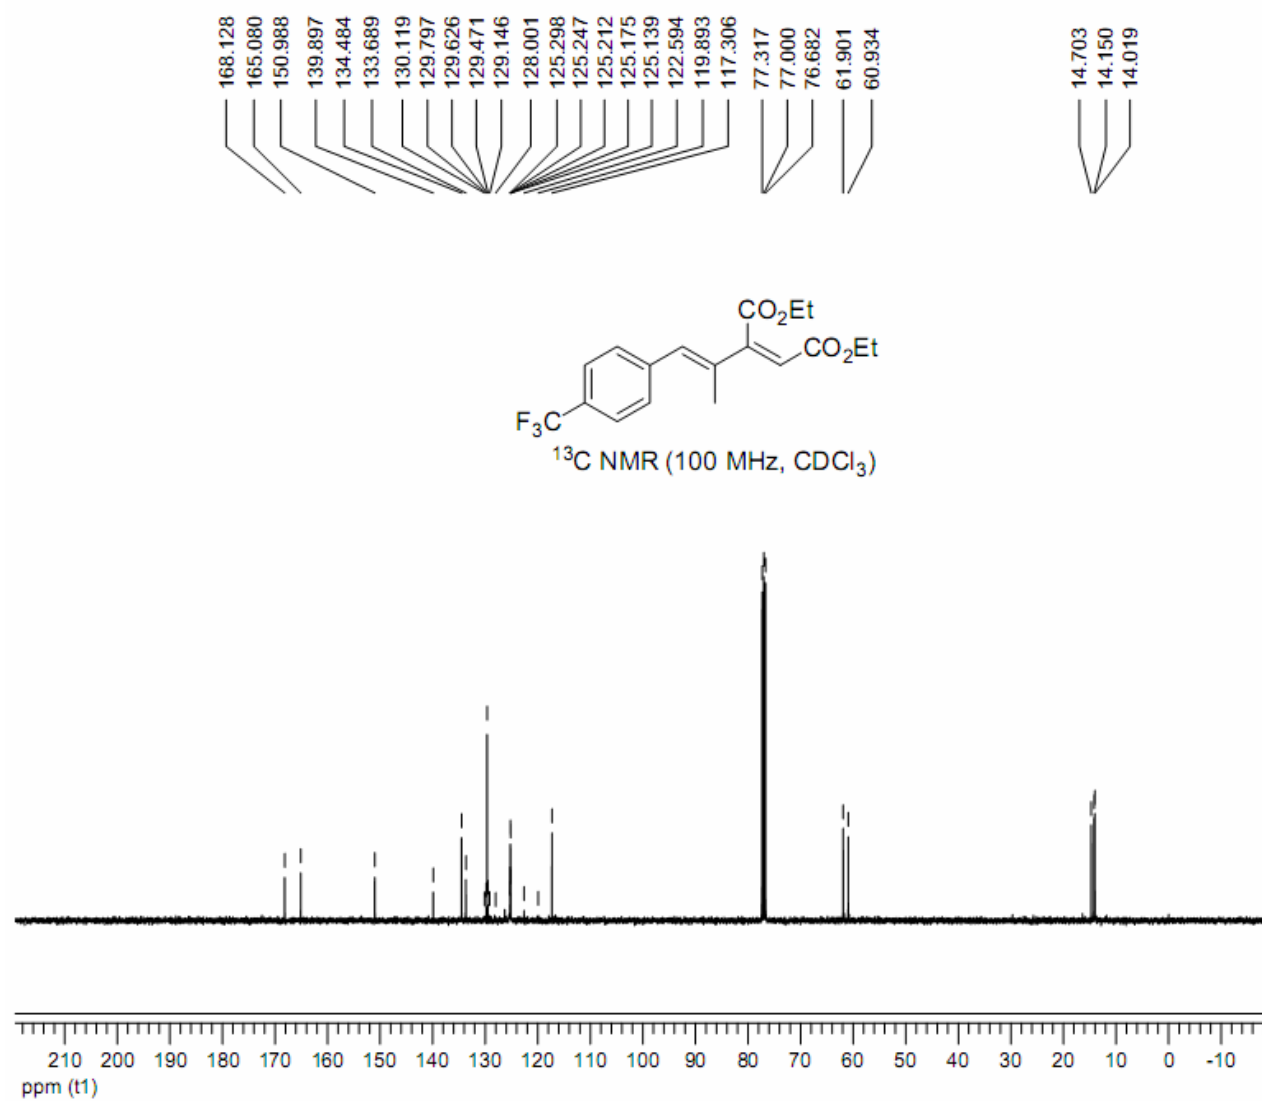

**Date:**  
18 Jun 2010

**Document's Title:**  
p-CF3-C.mrc

**Spectrum Title:**  
C13CPD

**Frequency (MHz):**  
(f1) 100.613

**Original Points Count:**  
(f1) 32768

**Actual Points Count:**  
(f1) 32768

**Acquisition Time (sec):**  
(f1) 1.3631

**Spectral Width (ppm):**  
(f1) 238.921

**Pulse Program:**  
Unknown

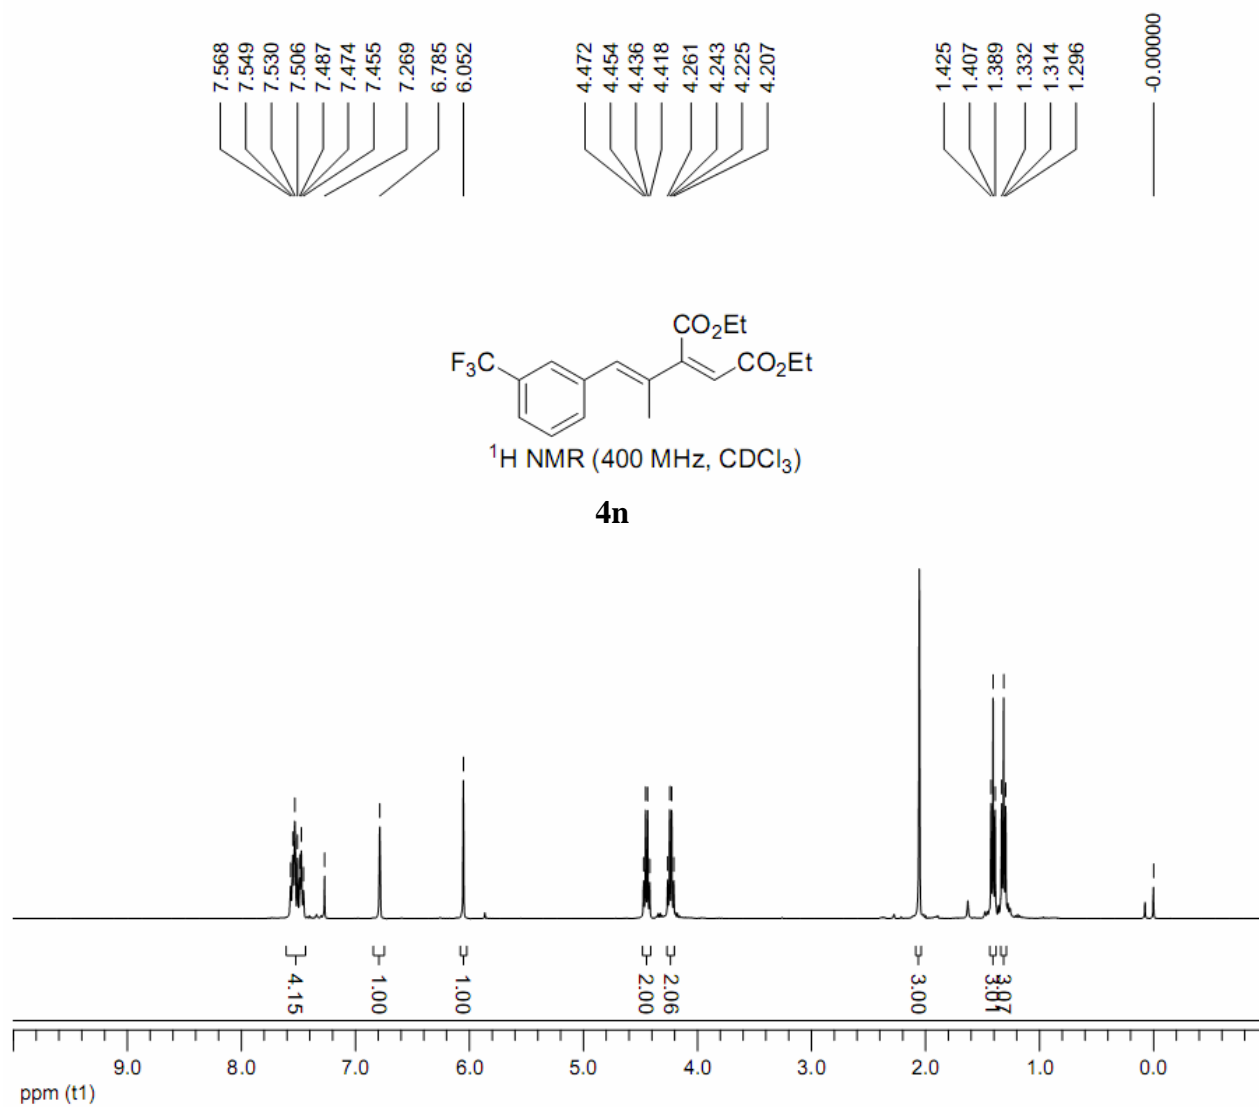

**Date:**  
 16 Jun 2010  
**Document's Title:**  
 m-CF3-H.mrc  
**Spectrum Title:**  
 PROTON  
**Frequency (MHz):**  
 (f1) 400.130  
**Original Points Count:**  
 (f1) 32768  
**Actual Points Count:**  
 (f1) 32768  
**Acquisition Time (sec):**  
 (f1) 3.9846  
**Spectral Width (ppm):**  
 (f1) 20.553  
**Pulse Program:**  
 Unknown

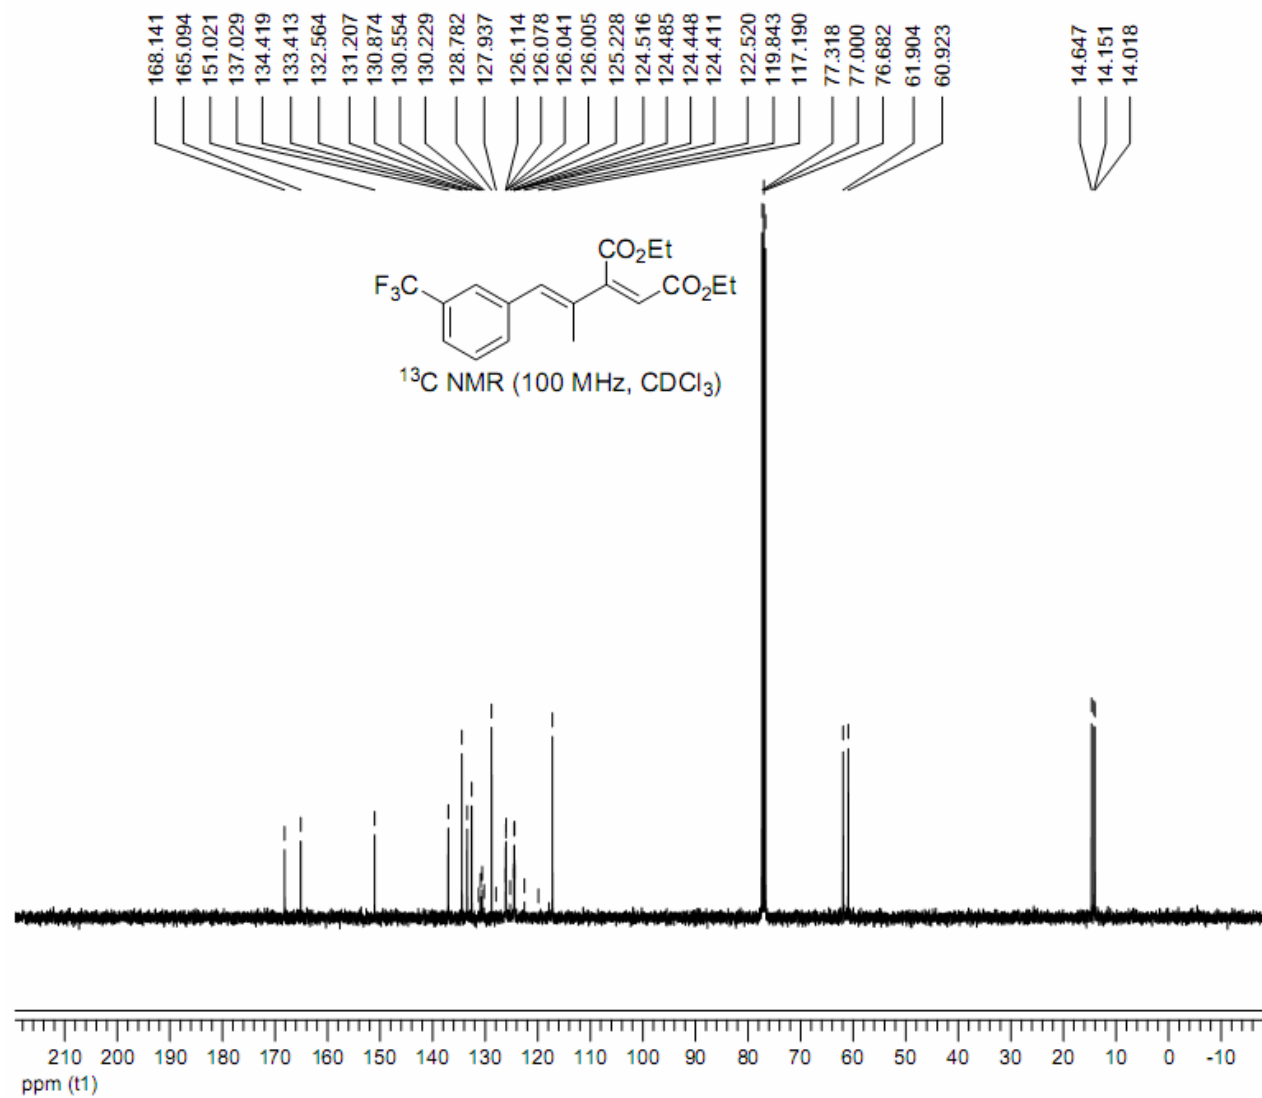

**Date:**  
18 Jun 2010

**Document's Title:**  
m-CF3-C.mrc

**Spectrum Title:**  
C13CPD

**Frequency (MHz):**  
(f1) 100.613

**Original Points Count:**  
(f1) 32768

**Actual Points Count:**  
(f1) 32768

**Acquisition Time (sec):**  
(f1) 1.3631

**Spectral Width (ppm):**  
(f1) 238.921

**Pulse Program:**  
Unknown

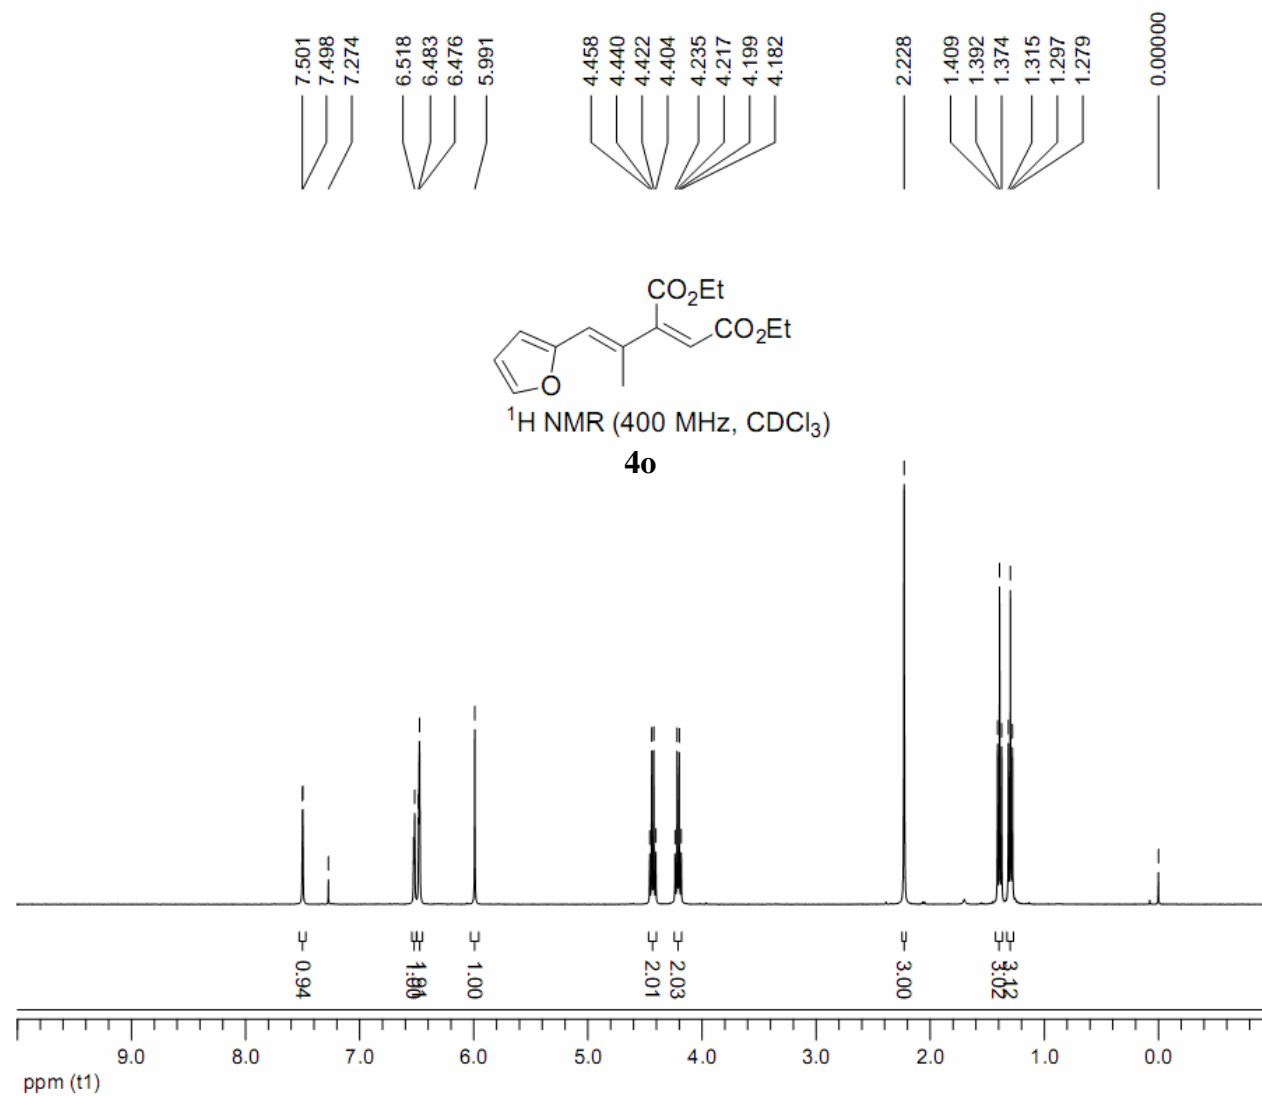

**Date:**  
 15 Jun 2010  
**Document's Title:**  
 furyl-H.mrc  
**Spectrum Title:**  
 PROTON  
**Frequency (MHz):**  
 (f1) 400.130  
**Original Points Count:**  
 (f1) 32768  
**Actual Points Count:**  
 (f1) 32768  
**Acquisition Time (sec):**  
 (f1) 3.9846  
**Spectral Width (ppm):**  
 (f1) 20.553  
**Pulse Program:**  
 Unknown

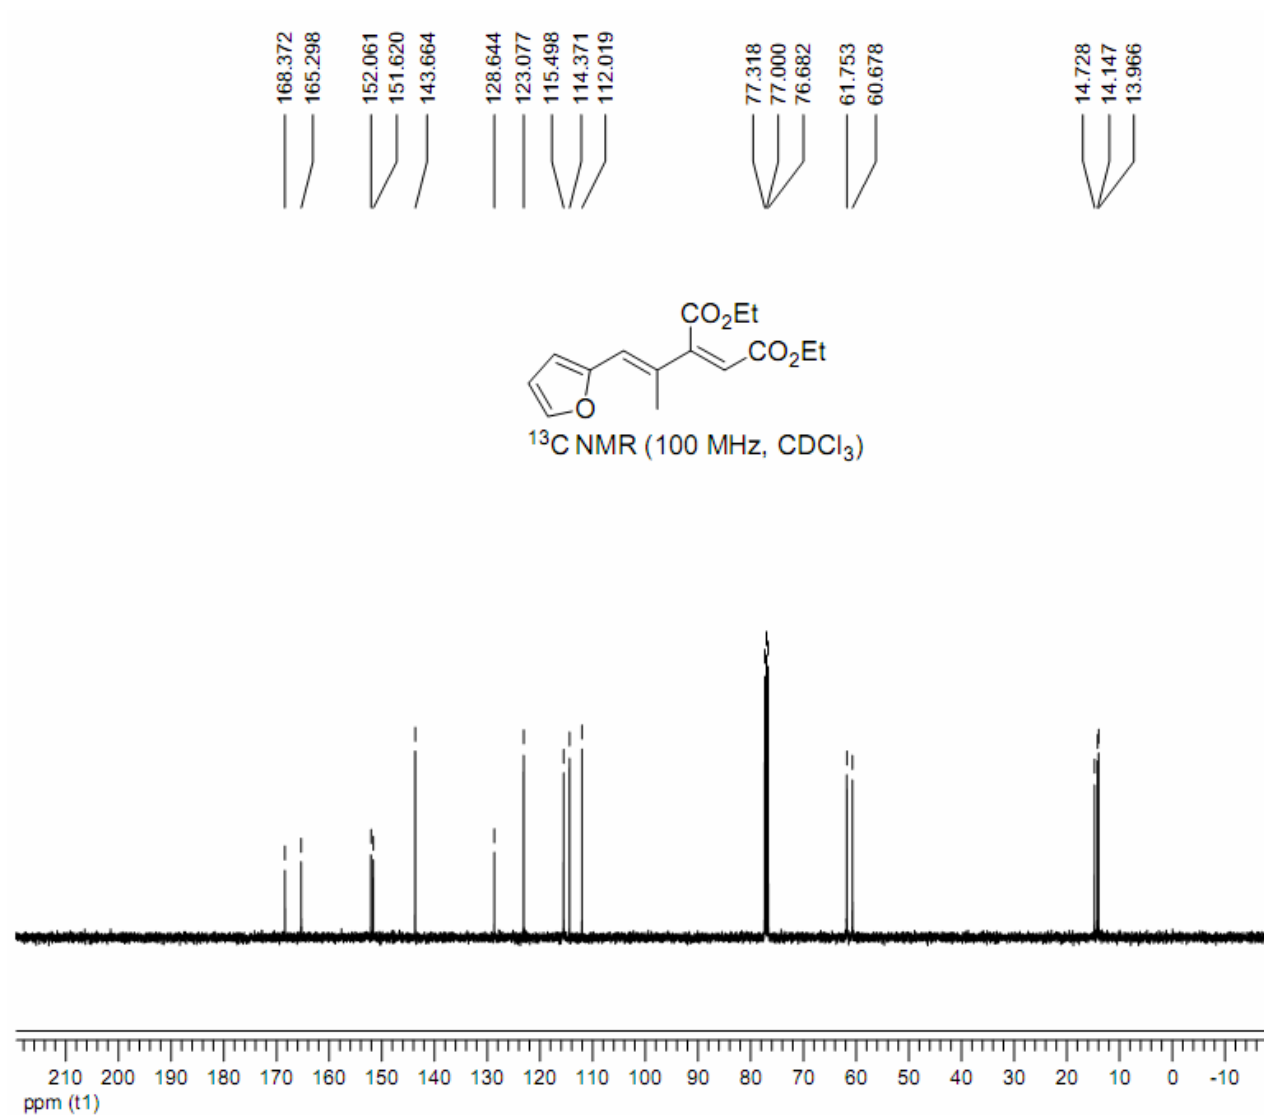

**Date:**  
15 Jun 2010

**Document's Title:**  
furyl-C.mrc

**Spectrum Title:**  
C13CPD

**Frequency (MHz):**  
(f1) 100.613

**Original Points Count:**  
(f1) 32768

**Actual Points Count:**  
(f1) 32768

**Acquisition Time (sec):**  
(f1) 1.3631

**Spectral Width (ppm):**  
(f1) 238.921

**Pulse Program:**  
Unknown

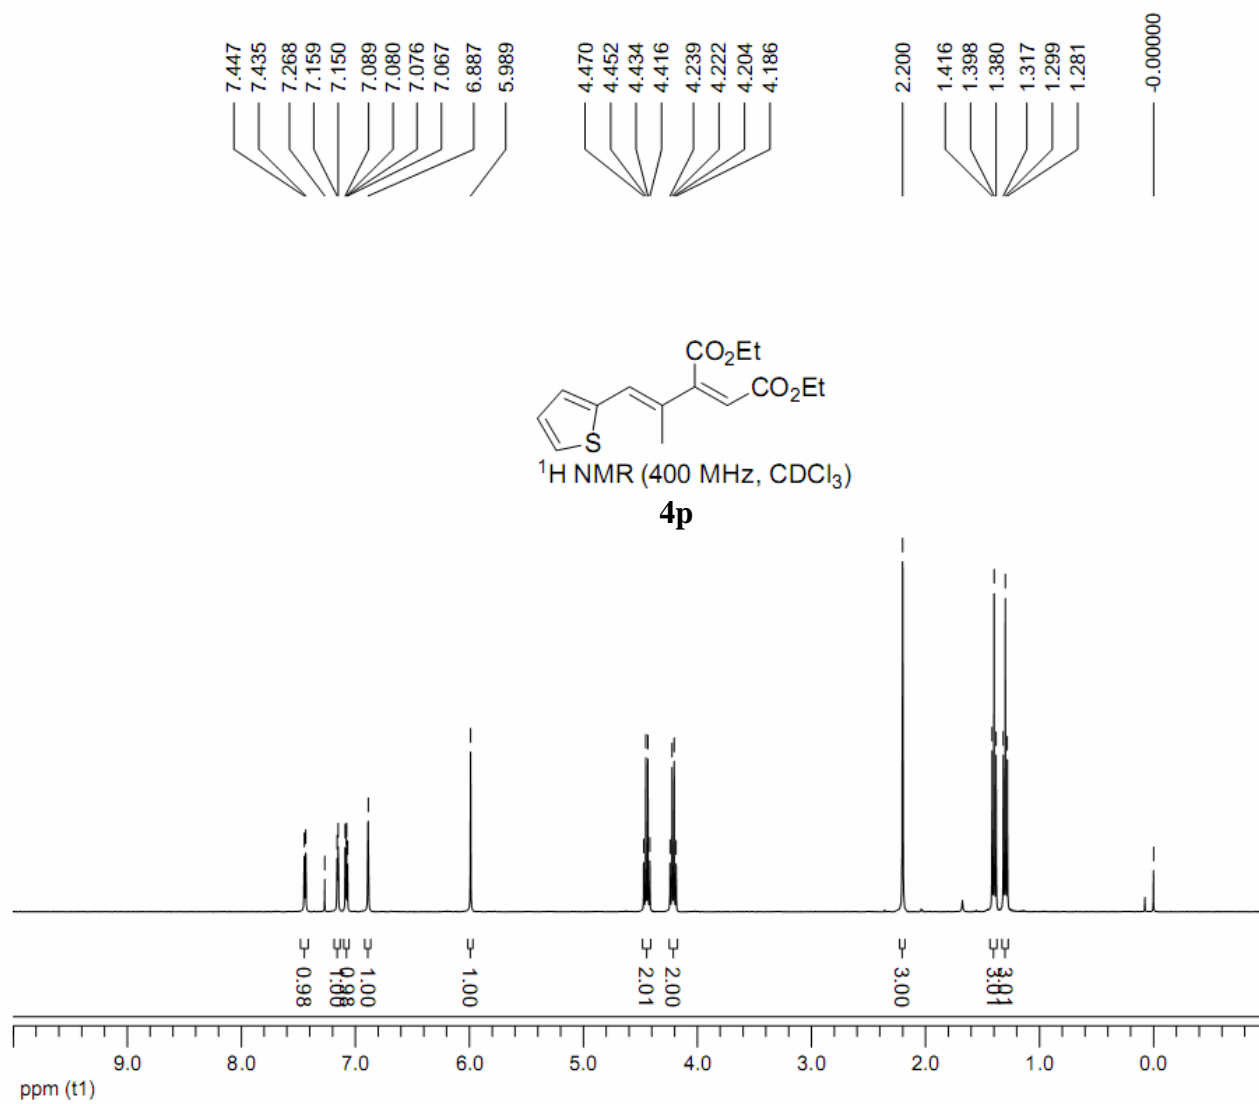

**Date:**  
 15 Jun 2010  
**Document's Title:**  
 thiofuryl-H.mrc  
**Spectrum Title:**  
 PROTON  
**Frequency (MHz):**  
 (f1) 400.130  
**Original Points Count:**  
 (f1) 32768  
**Actual Points Count:**  
 (f1) 32768  
**Acquisition Time (sec):**  
 (f1) 3.9846  
**Spectral Width (ppm):**  
 (f1) 20.553  
**Pulse Program:**  
 Unknown

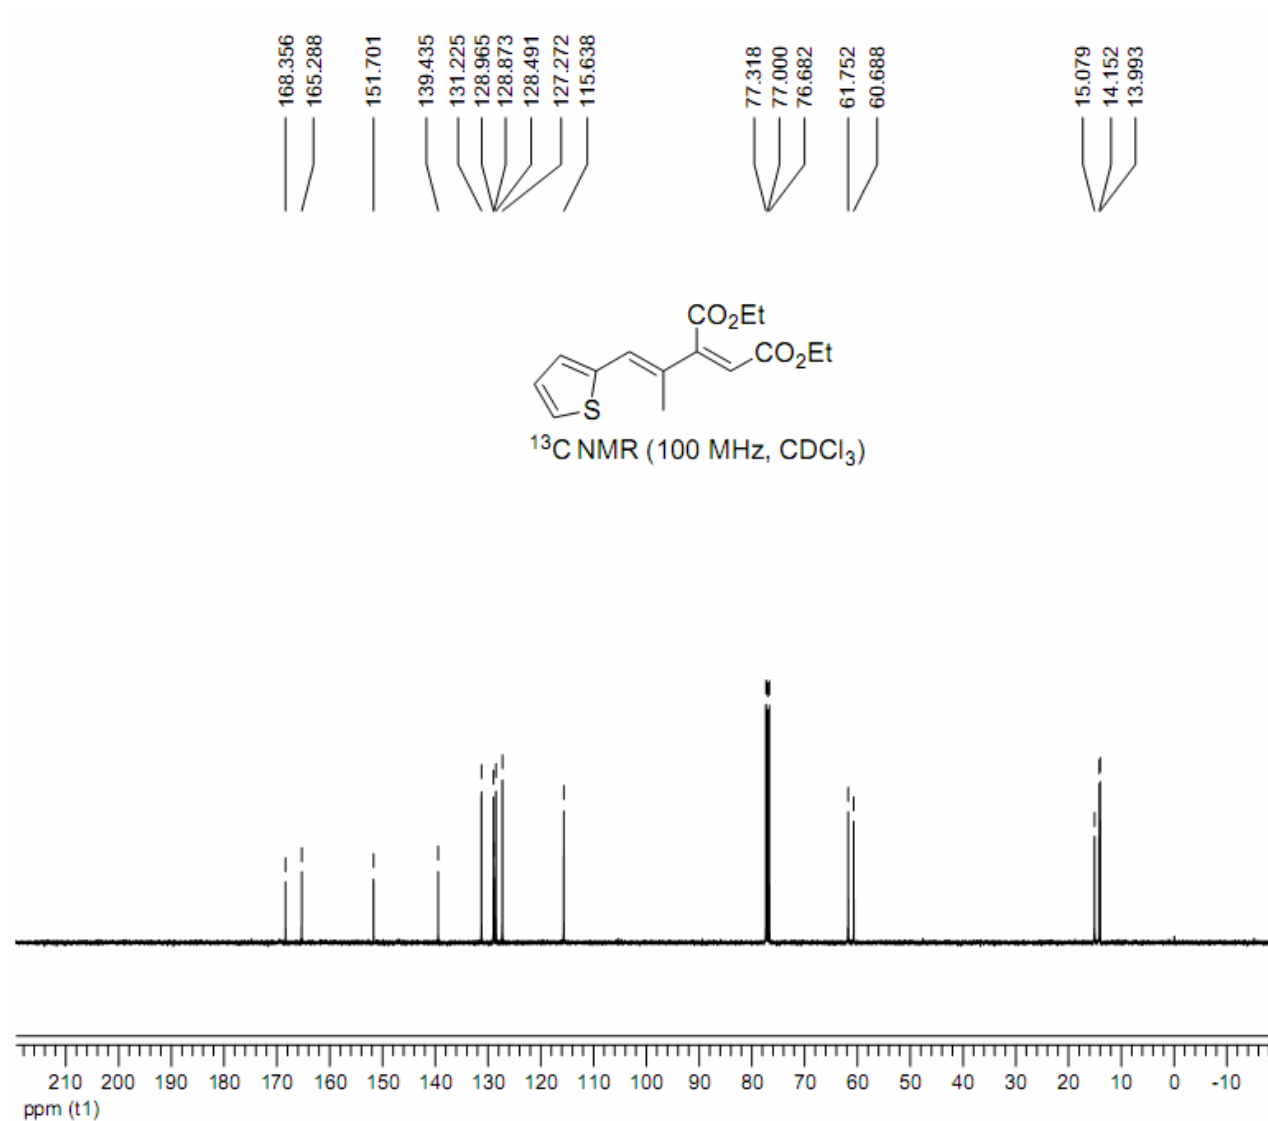

**Date:**  
15 Jun 2010

**Document's Title:**  
thiofuryl-C.mrc

**Spectrum Title:**  
C13CPD

**Frequency (MHz):**  
(f1) 100.613

**Original Points Count:**  
(f1) 32768

**Actual Points Count:**  
(f1) 32768

**Acquisition Time (sec):**  
(f1) 1.3631

**Spectral Width (ppm):**  
(f1) 238.921

**Pulse Program:**  
Unknown

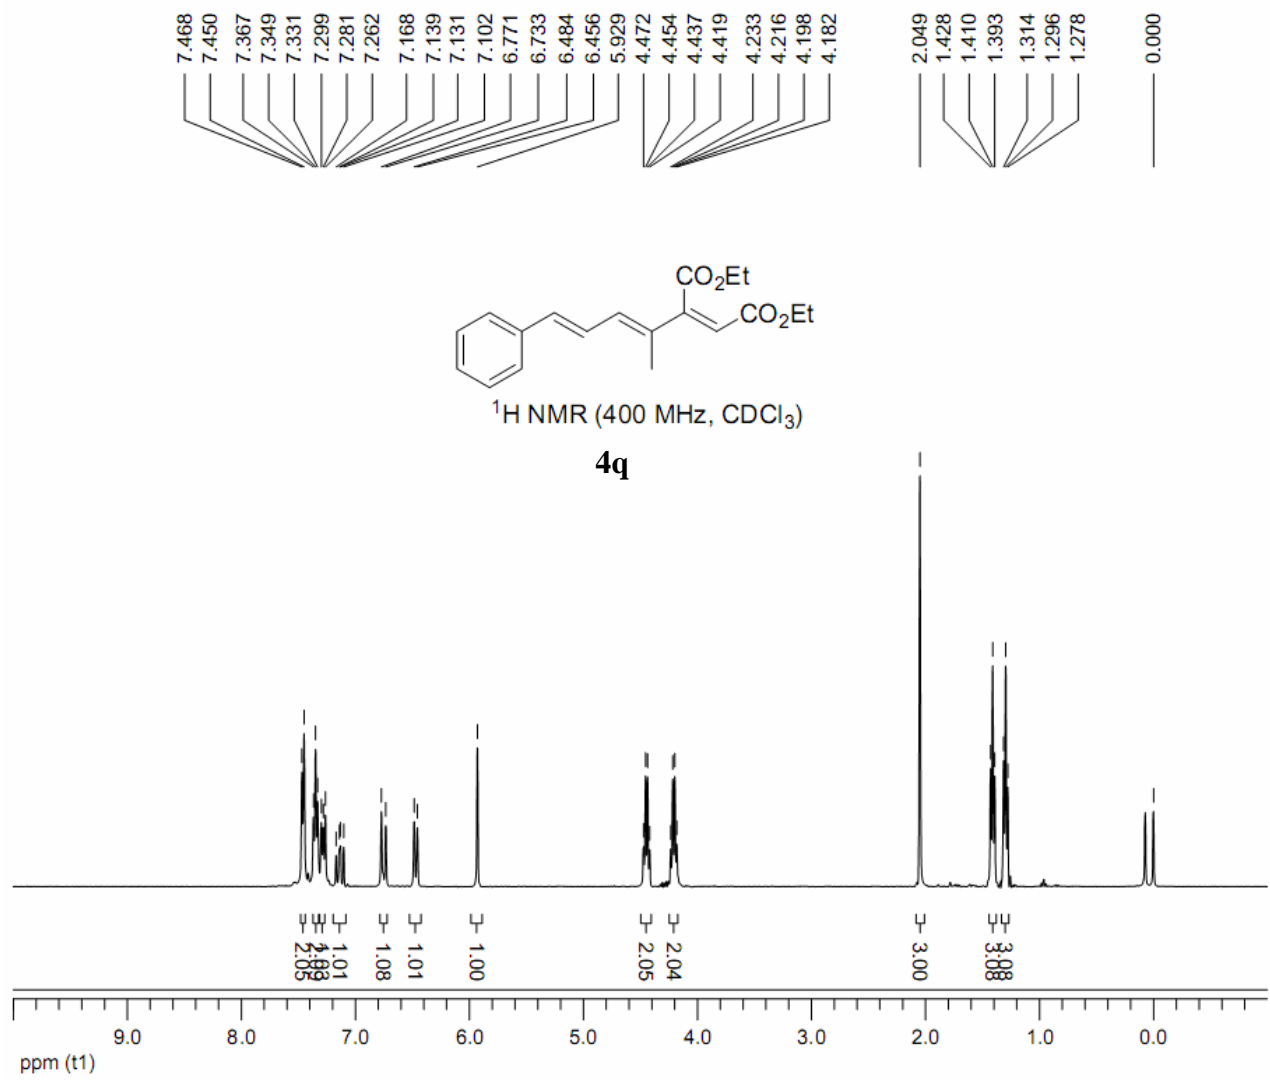

**Date:**  
16 Jun 2010

**Document's Title:**  
phCH=CH-H.mrc

**Spectrum Title:**  
PROTON

**Frequency (MHz):**  
(f1) 400.130

**Original Points Count:**  
(f1) 32768

**Actual Points Count:**  
(f1) 32768

**Acquisition Time (sec):**  
(f1) 3.9846

**Spectral Width (ppm):**  
(f1) 20.553

**Pulse Program:**  
Unknown



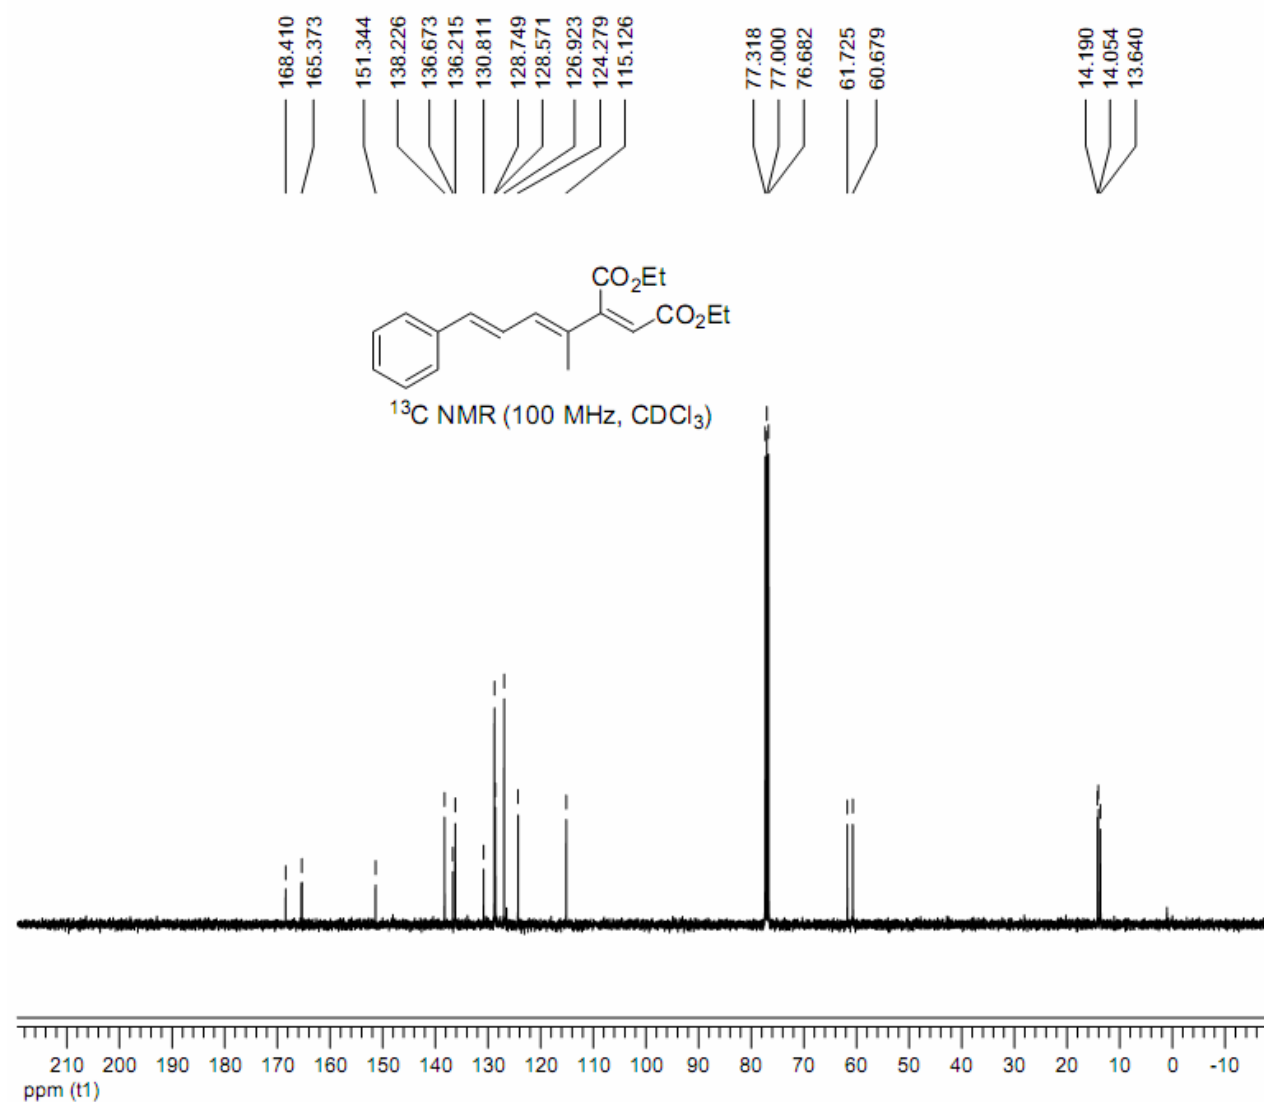

**Date:**  
 16 Jun 2010  
**Document's Title:**  
 phCH=CH-C.mrc  
**Spectrum Title:**  
 C13CPD  
**Frequency (MHz):**  
 (f1) 100.613  
**Original Points Count:**  
 (f1) 32768  
**Actual Points Count:**  
 (f1) 32768  
**Acquisition Time (sec):**  
 (f1) 1.3631  
**Spectral Width (ppm):**  
 (f1) 238.920  
**Pulse Program:**  
 Unknown

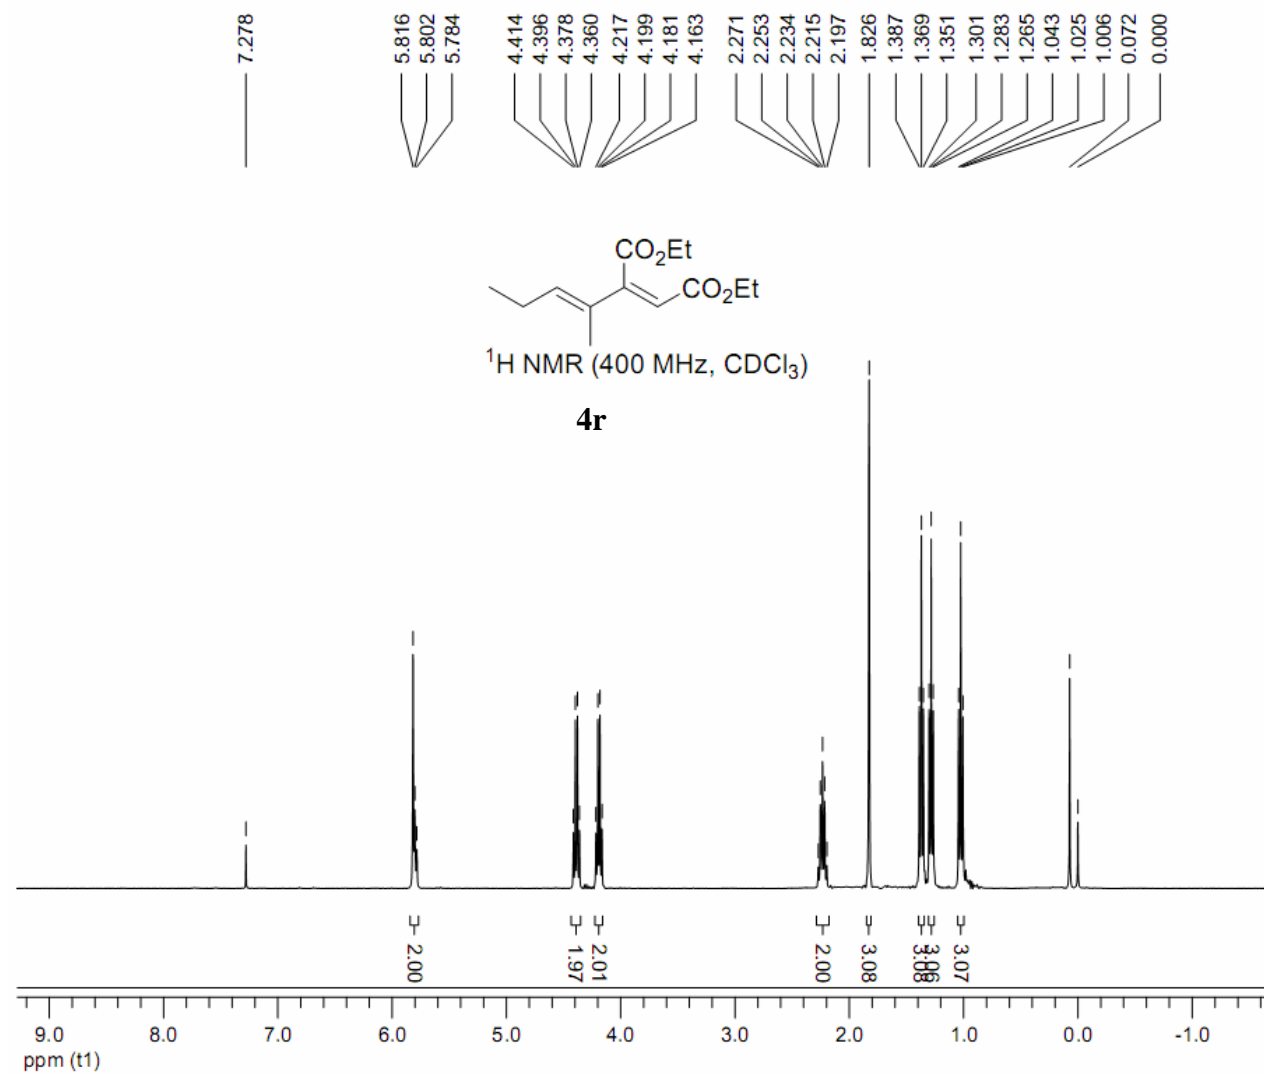

**Date:**  
 16 Jun 2010  
**Document's Title:**  
 C2H5-H.mrc  
**Spectrum Title:**  
 PROTON  
**Frequency (MHz):**  
 (f1) 400.130  
**Original Points Count:**  
 (f1) 32768  
**Actual Points Count:**  
 (f1) 32768  
**Acquisition Time (sec):**  
 (f1) 3.9846  
**Spectral Width (ppm):**  
 (f1) 20.553  
**Pulse Program:**  
 Unknown

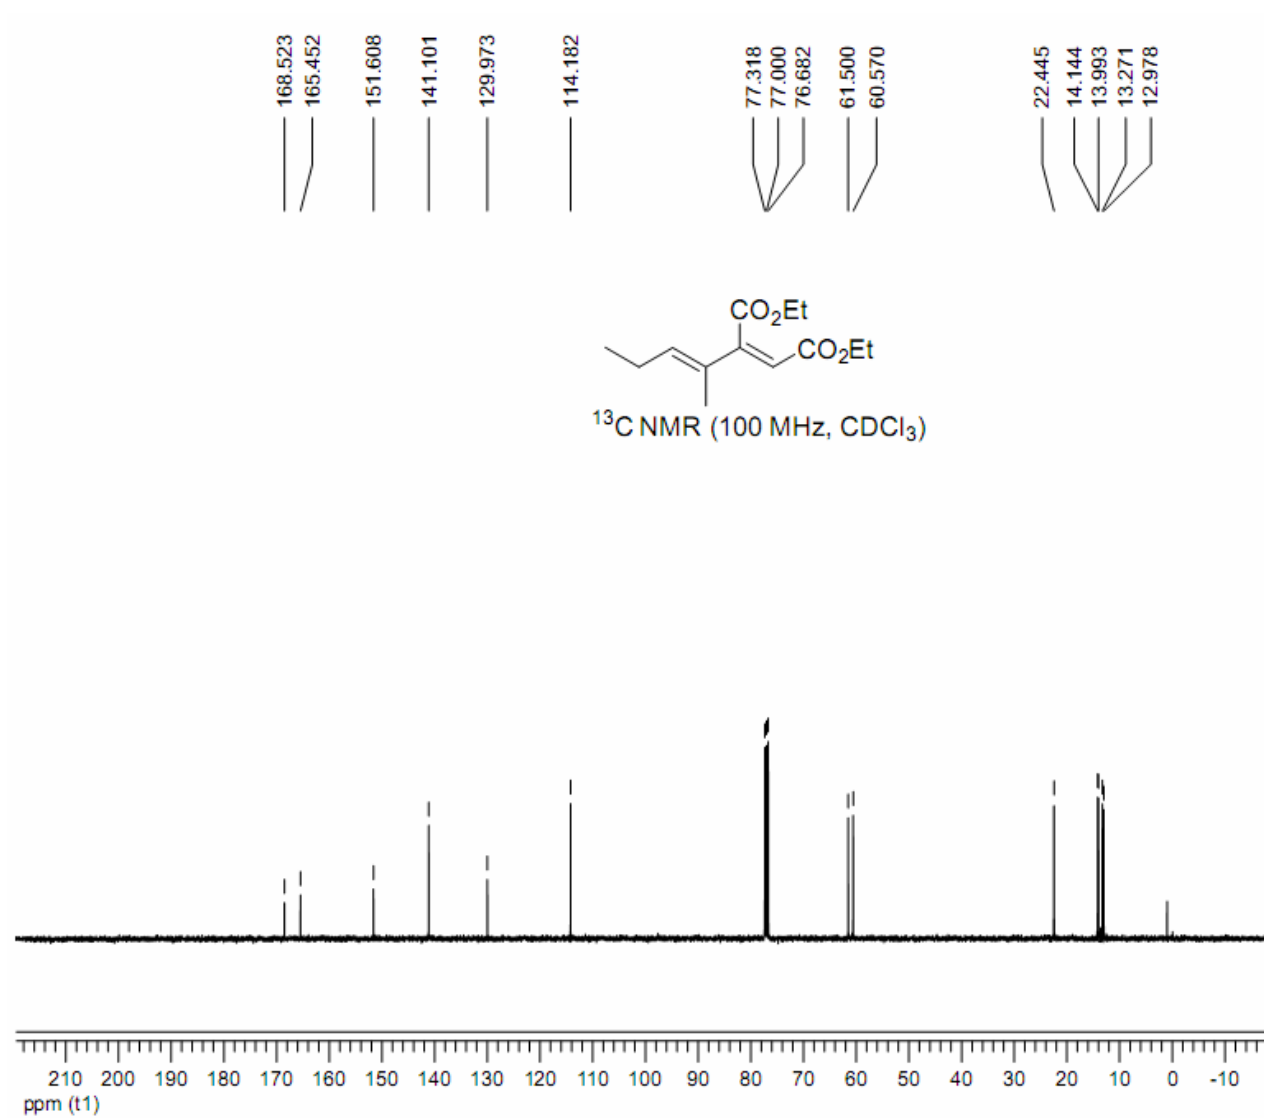

**Date:**  
 16 Jun 2010  
**Document's Title:**  
 C2H5-C.mrc  
**Spectrum Title:**  
 C13CPD  
**Frequency (MHz):**  
 (f1) 100.613  
**Original Points Count:**  
 (f1) 32768  
**Actual Points Count:**  
 (f1) 32768  
**Acquisition Time (sec):**  
 (f1) 1.3631  
**Spectral Width (ppm):**  
 (f1) 238.920  
**Pulse Program:**  
 Unknown

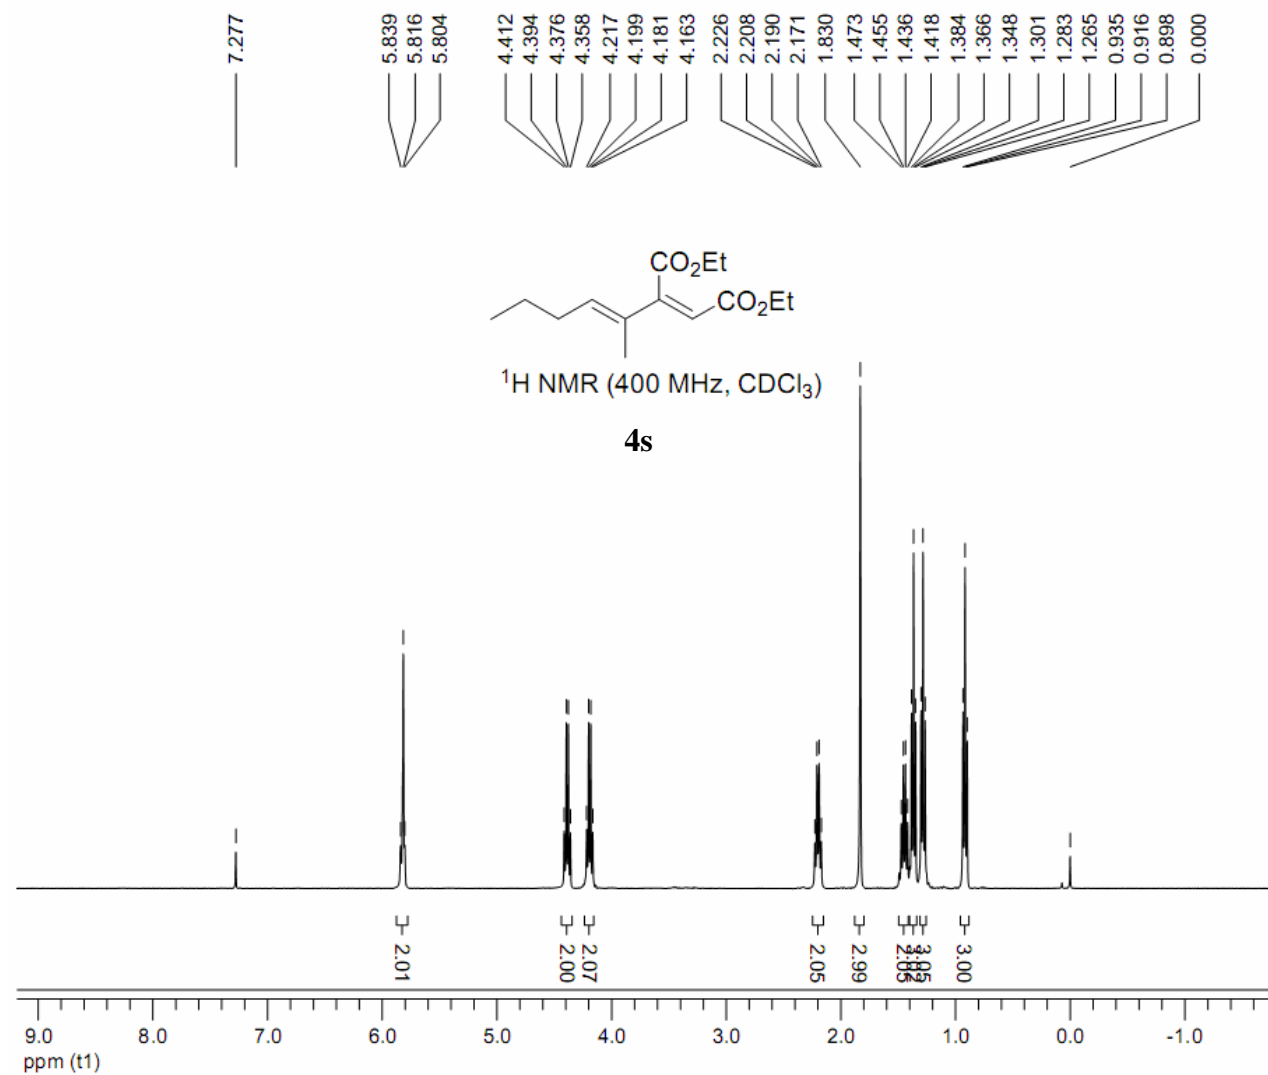

**Date:**  
 16 Jun 2010  
**Document's Title:**  
 C3H7-H.mrc  
**Spectrum Title:**  
 PROTON  
**Frequency (MHz):**  
 (f1) 400.130  
**Original Points Count:**  
 (f1) 32768  
**Actual Points Count:**  
 (f1) 32768  
**Acquisition Time (sec):**  
 (f1) 3.9846  
**Spectral Width (ppm):**  
 (f1) 20.553  
**Pulse Program:**  
 Unknown

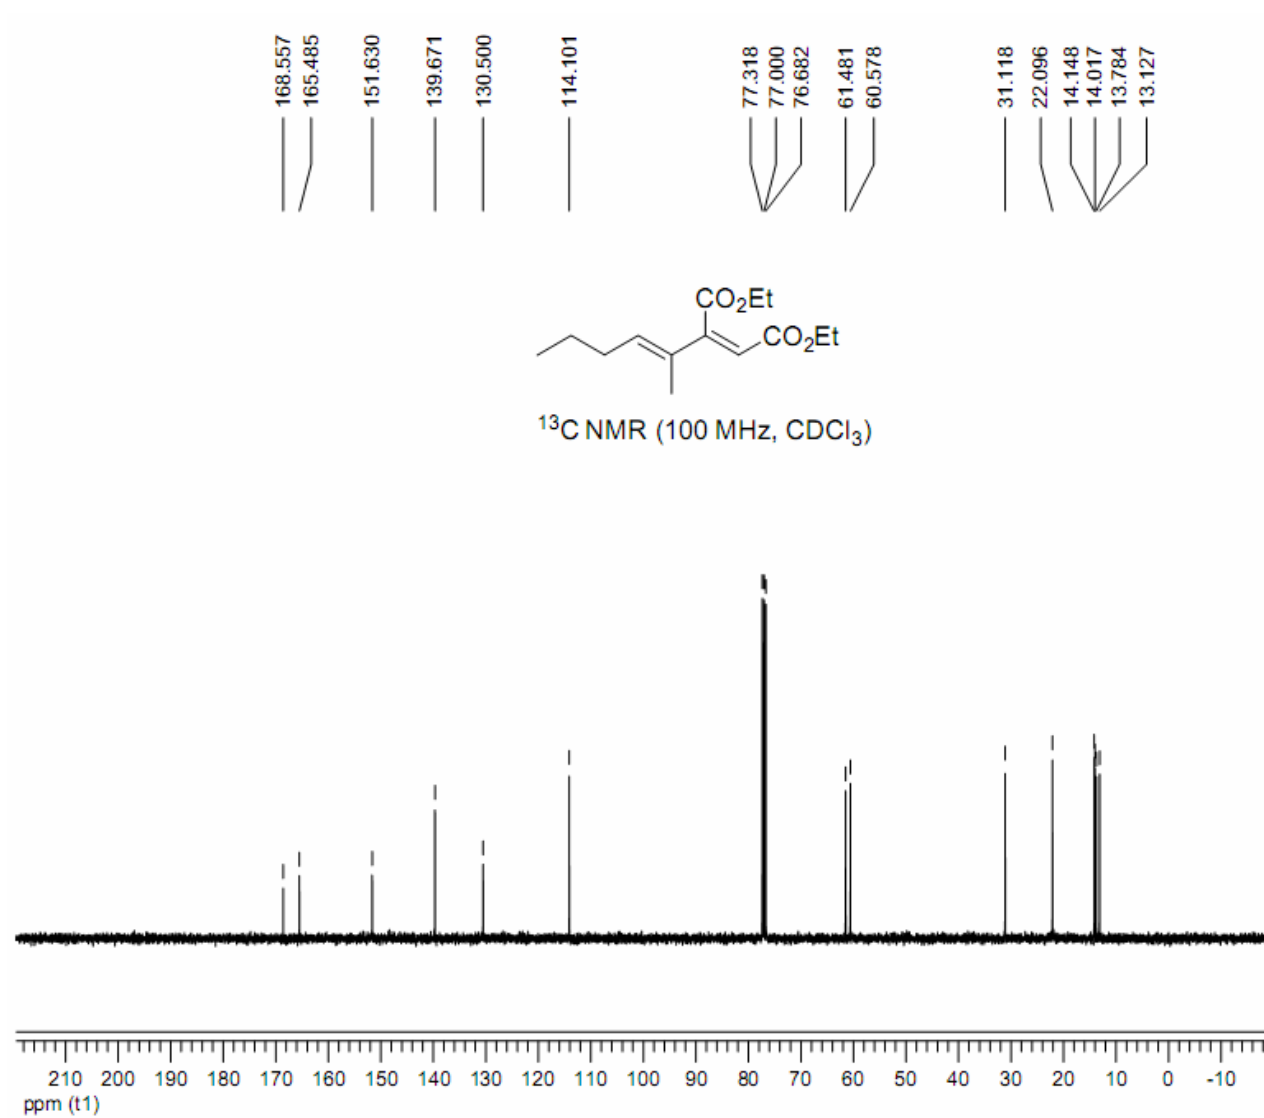

**Date:**  
16 Jun 2010

**Document's Title:**  
C3H7-C.mrc

**Spectrum Title:**  
C13CPD

**Frequency (MHz):**  
(f1) 100.613

**Original Points Count:**  
(f1) 32768

**Actual Points Count:**  
(f1) 32768

**Acquisition Time (sec):**  
(f1) 1.3631

**Spectral Width (ppm):**  
(f1) 238.921

**Pulse Program:**  
Unknown

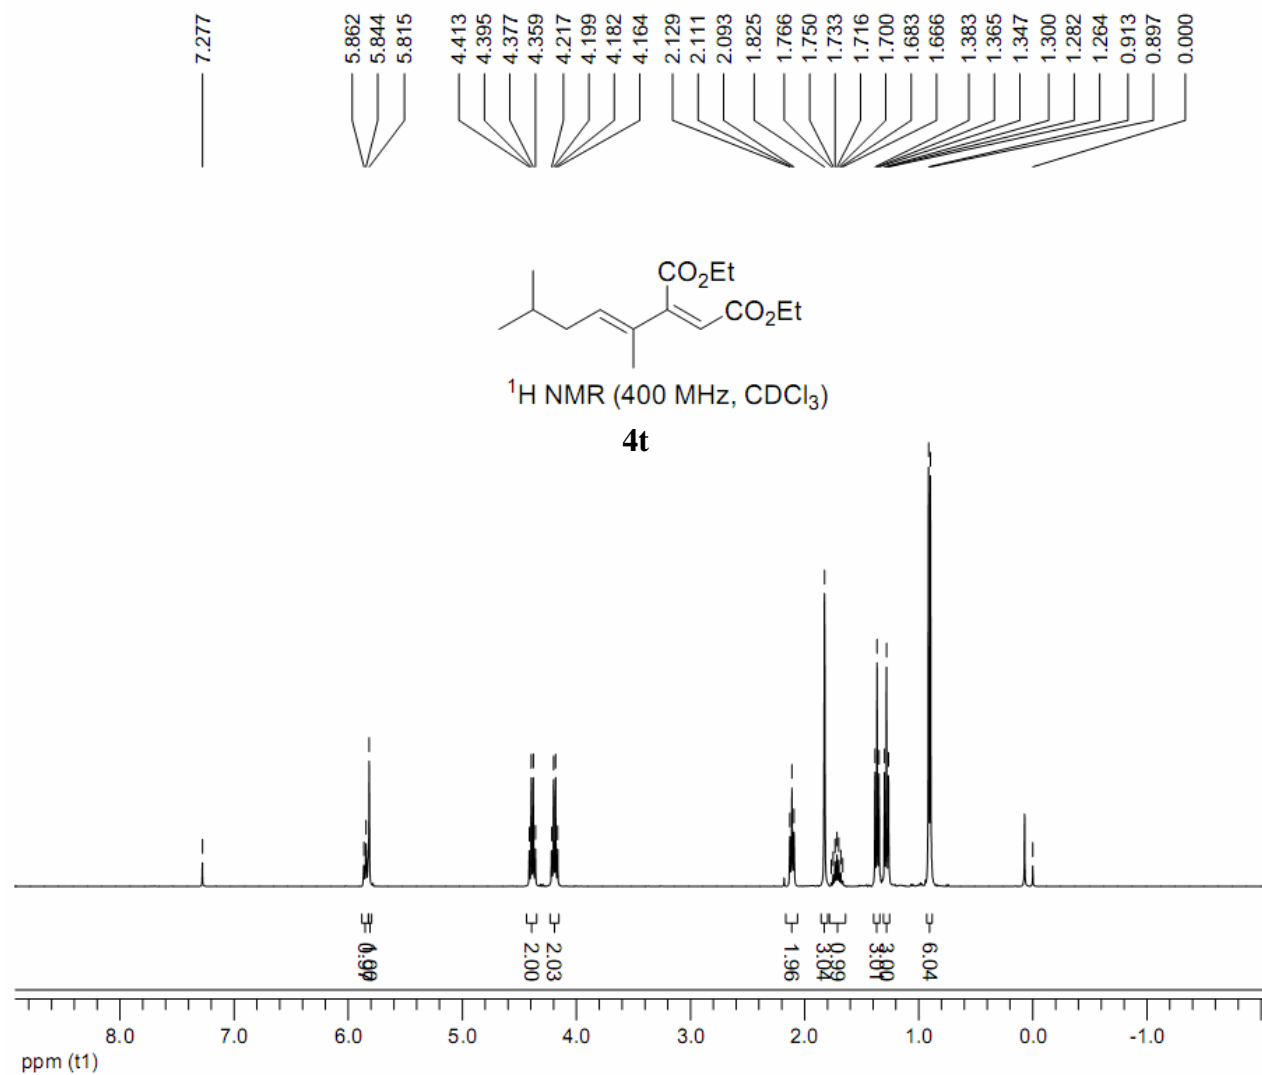

**Date:**  
 16 Jun 2010  
**Document's Title:**  
 iso-C4H9-H.mrc  
**Spectrum Title:**  
 PROTON  
**Frequency (MHz):**  
 (f1) 400.130  
**Original Points Count:**  
 (f1) 32768  
**Actual Points Count:**  
 (f1) 32768  
**Acquisition Time (sec):**  
 (f1) 3.9846  
**Spectral Width (ppm):**  
 (f1) 20.553  
**Pulse Program:**  
 Unknown

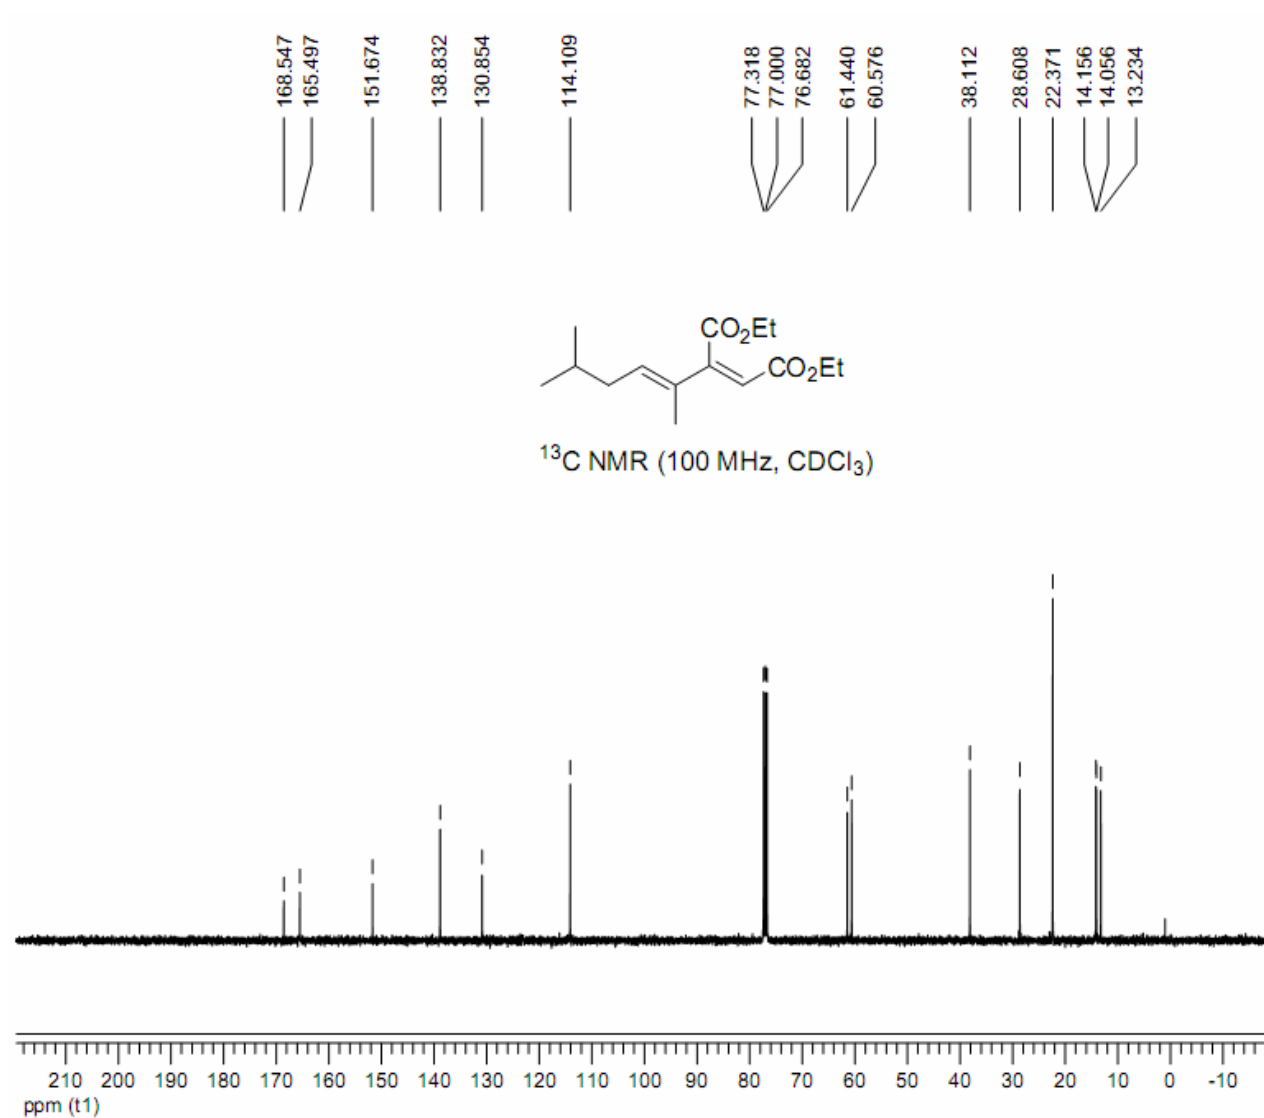

**Date:**  
18 Jun 2010  
**Document's Title:**  
iso-C4H9-C.mrc  
**Spectrum Title:**  
C13CPD  
**Frequency (MHz):**  
(f1) 100.613  
**Original Points Count:**  
(f1) 32768  
**Actual Points Count:**  
(f1) 32768  
**Acquisition Time (sec):**  
(f1) 1.3631  
**Spectral Width (ppm):**  
(f1) 238.920  
**Pulse Program:**  
Unknown

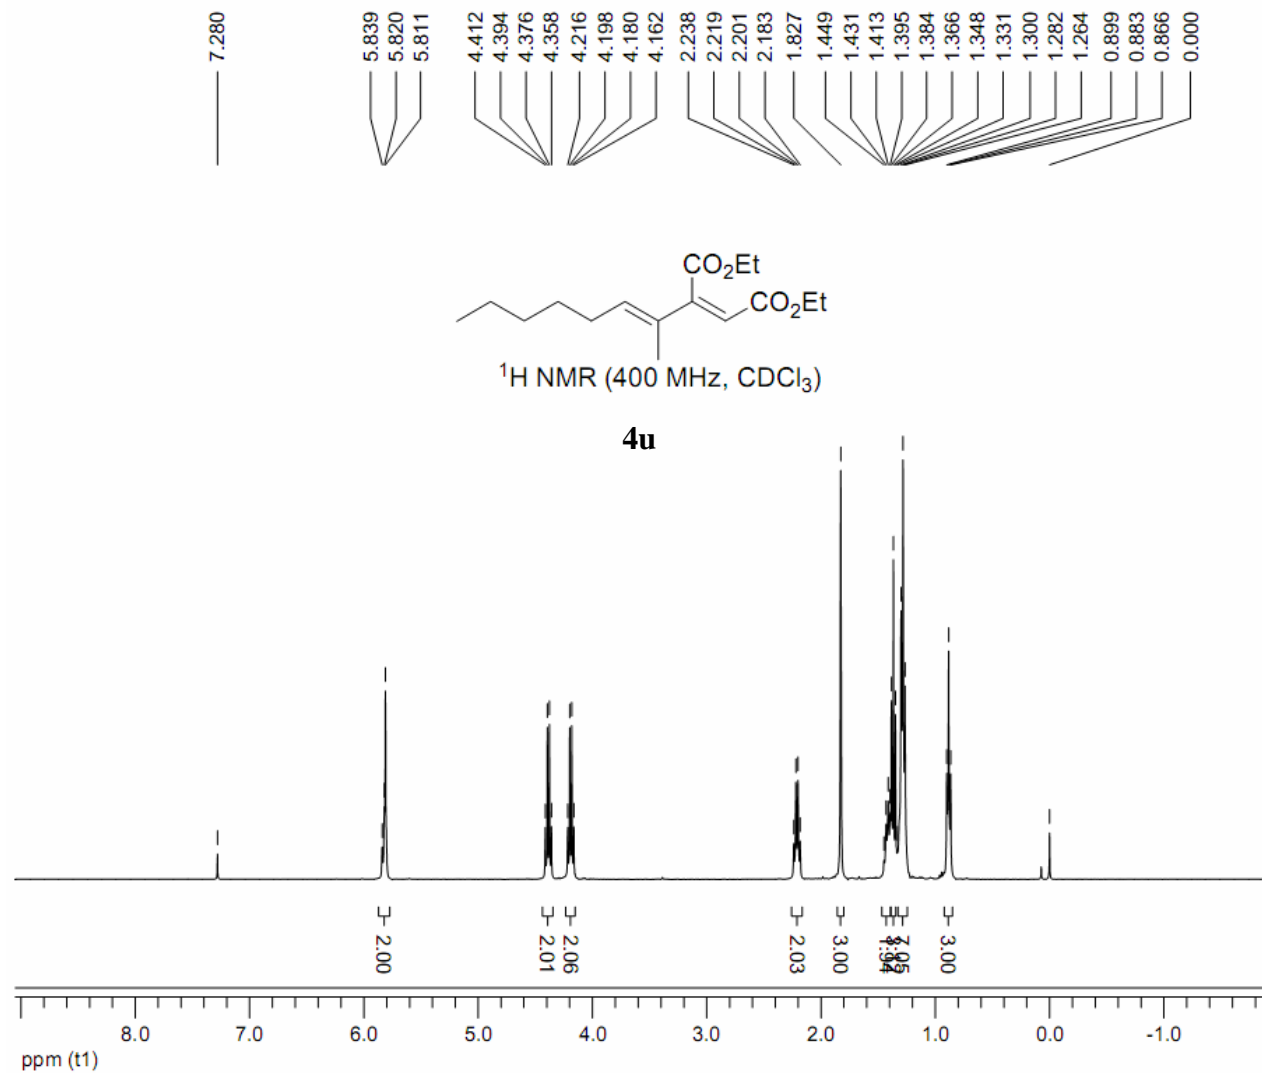

**Date:**  
 16 Jun 2010  
**Document's Title:**  
 C5H11-H.mrc  
**Spectrum Title:**  
 PROTON  
**Frequency (MHz):**  
 (f1) 400.130  
**Original Points Count:**  
 (f1) 32768  
**Actual Points Count:**  
 (f1) 32768  
**Acquisition Time (sec):**  
 (f1) 3.9846  
**Spectral Width (ppm):**  
 (f1) 20.553  
**Pulse Program:**  
 Unknown



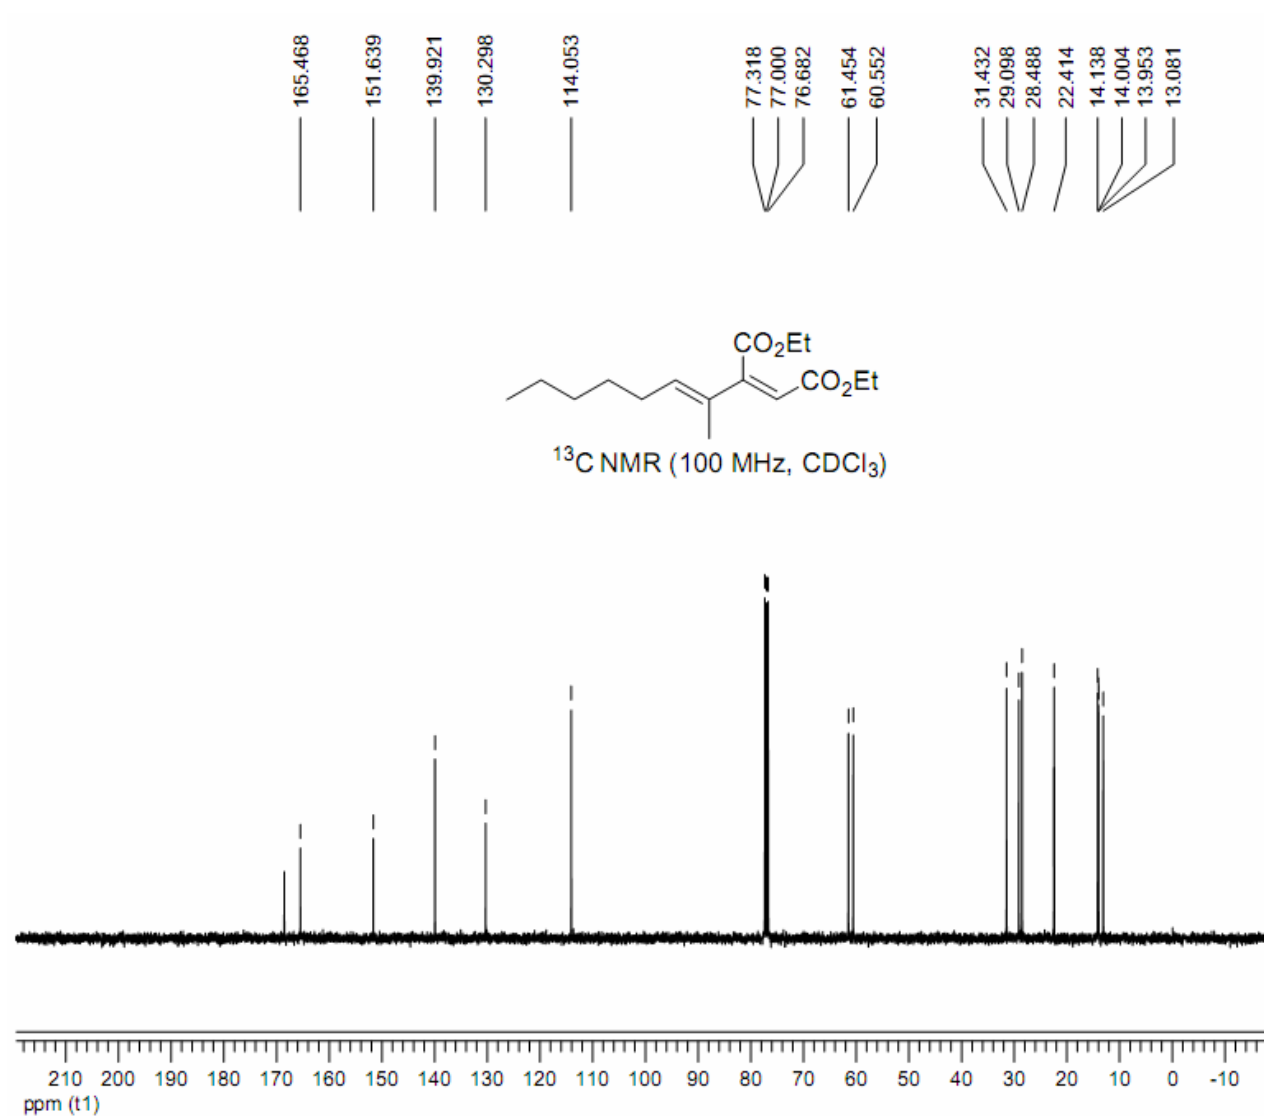

**Date:**  
 16 Jun 2010  
**Document's Title:**  
 C5H11-C.mrc  
**Spectrum Title:**  
 C13CPD  
**Frequency (MHz):**  
 (f1) 100.613  
**Original Points Count:**  
 (f1) 32768  
**Actual Points Count:**  
 (f1) 32768  
**Acquisition Time (sec):**  
 (f1) 1.3631  
**Spectral Width (ppm):**  
 (f1) 238.921  
**Pulse Program:**  
 Unknown

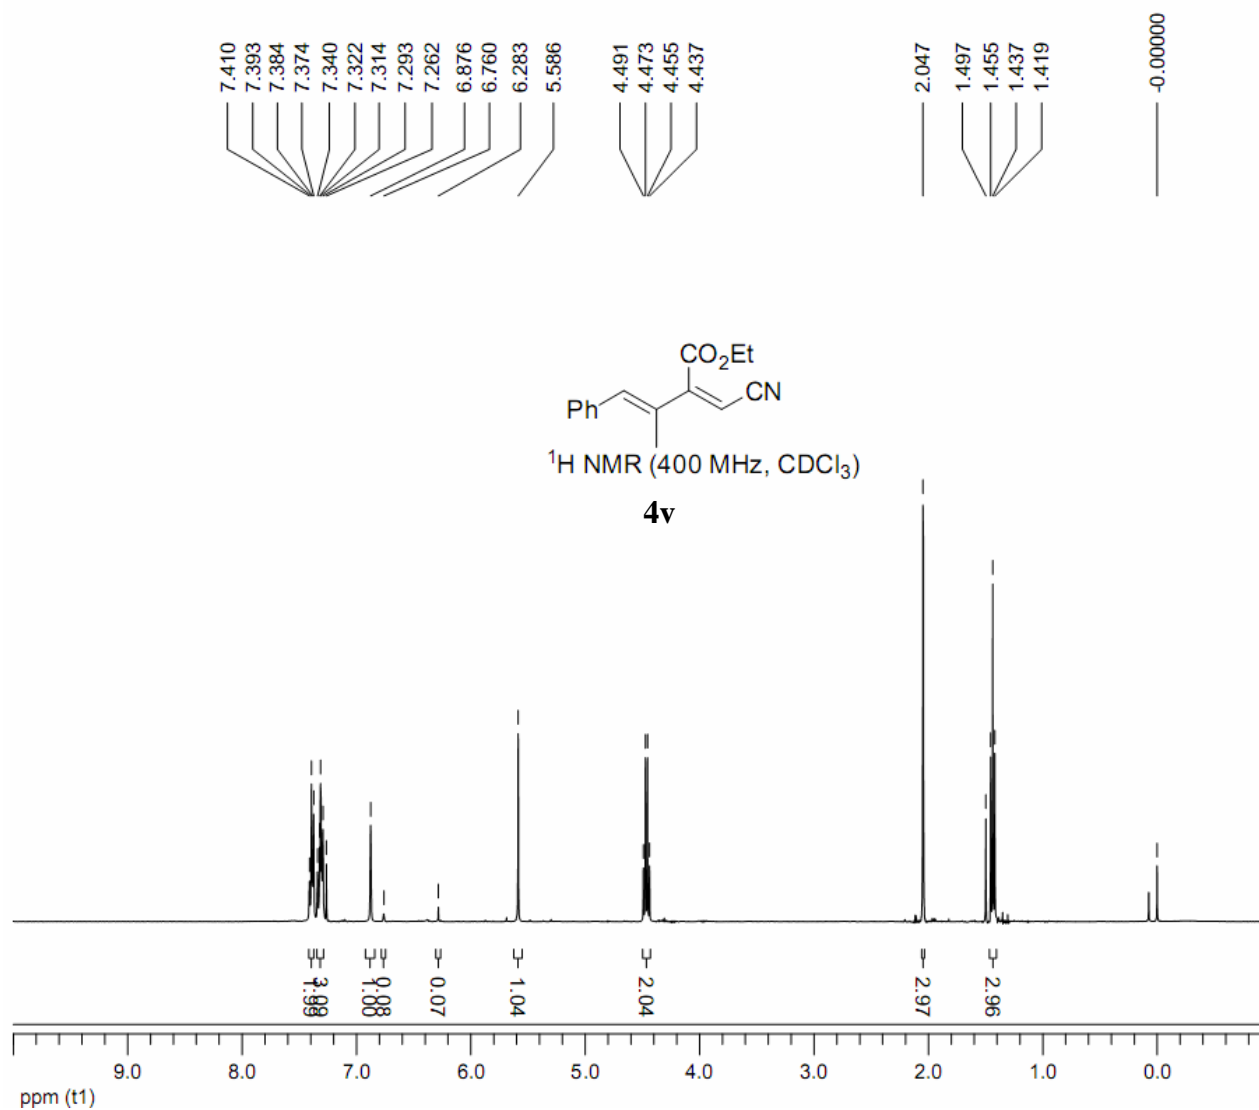

**Date:**  
17 Jun 2010  
**Document's Title:**  
a-CH<sub>2</sub>CN-allene-Ph-H.m

**Spectrum Title:**  
PROTON

**Frequency (MHz):**  
(f1) 400.130  
**Original Points Count:**  
(f1) 32768  
**Actual Points Count:**  
(f1) 32768  
**Acquisition Time (sec):**  
(f1) 3.9846  
**Spectral Width (ppm):**  
(f1) 20.553  
**Pulse Program:**  
Unknown

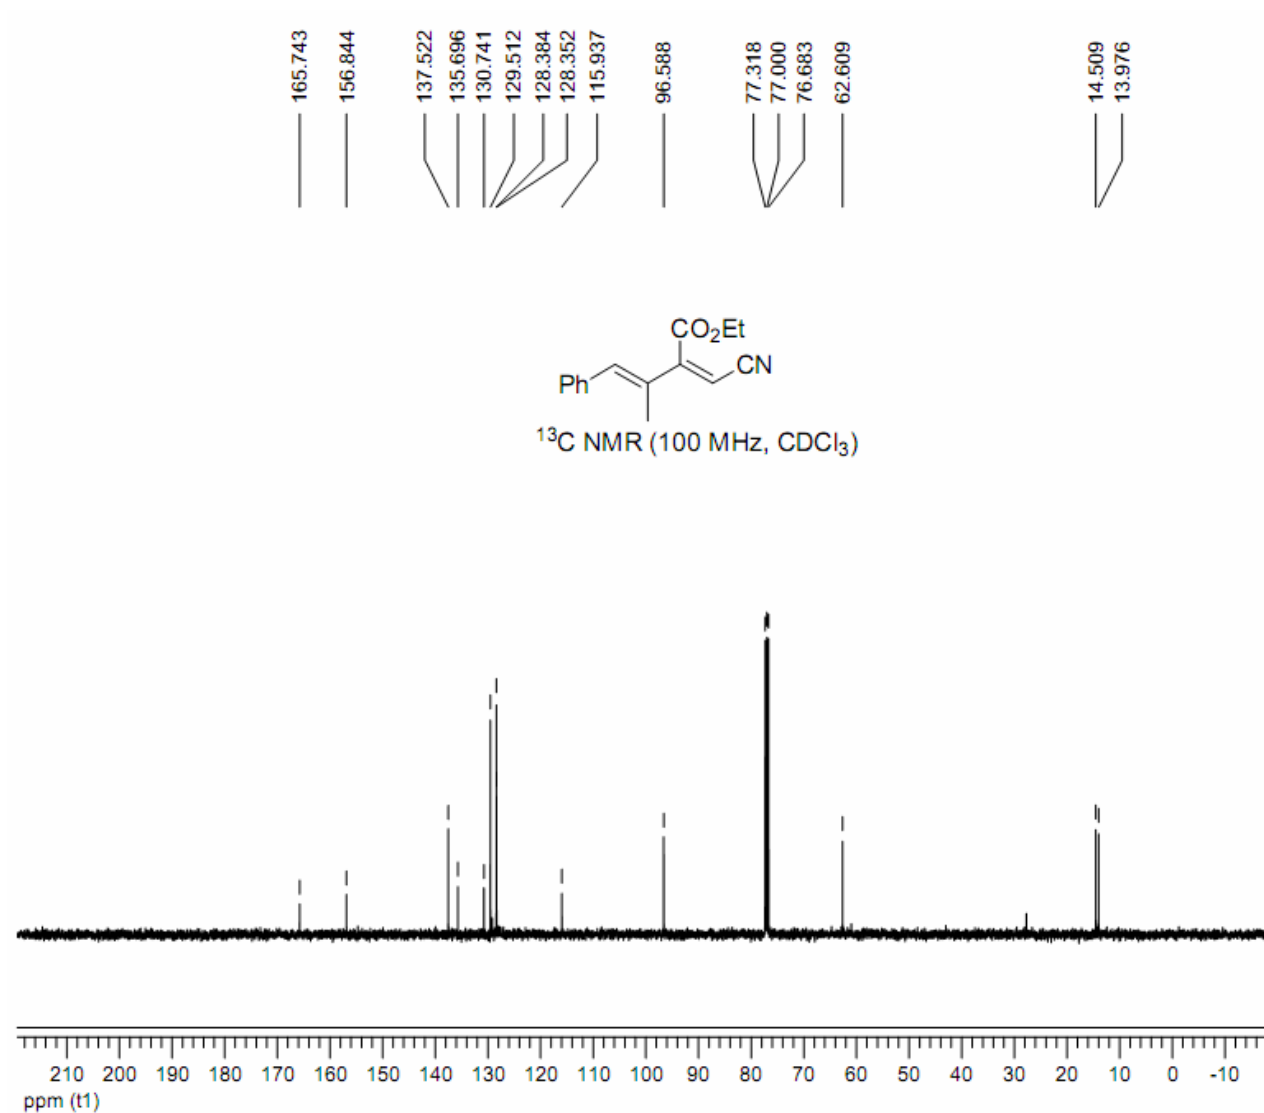

**Date:**  
16 Jun 2010

**Document's Title:**  
a-CH<sub>2</sub>CN-allene-Ph-C.m

**Spectrum Title:**  
C13CPD

**Frequency (MHz):**  
(f1) 100.613

**Original Points Count:**  
(f1) 32768

**Actual Points Count:**  
(f1) 32768

**Acquisition Time (sec):**  
(f1) 1.3631

**Spectral Width (ppm):**  
(f1) 238.921

**Pulse Program:**  
Unknown

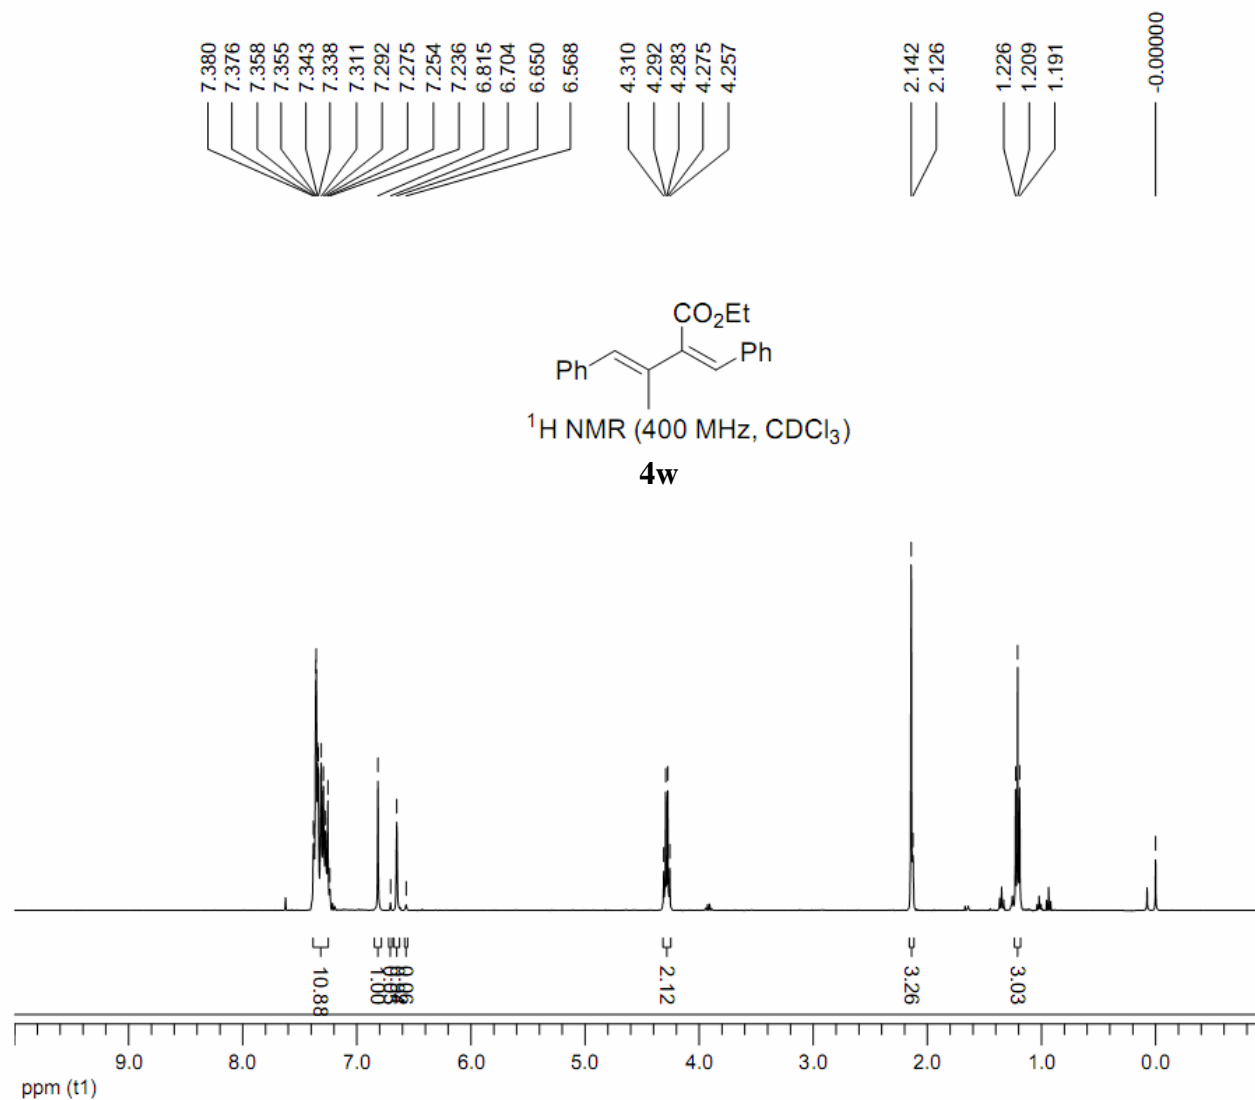

**Date:**  
16 Jun 2010  
**Document's Title:**  
a-Ph-allene-Ph-H.mrc

**Spectrum Title:**  
PROTON

**Frequency (MHz):**  
(f1) 400.130  
**Original Points Count:**  
(f1) 32768  
**Actual Points Count:**  
(f1) 32768  
**Acquisition Time (sec):**  
(f1) 3.9846  
**Spectral Width (ppm):**  
(f1) 20.553  
**Pulse Program:**  
Unknown

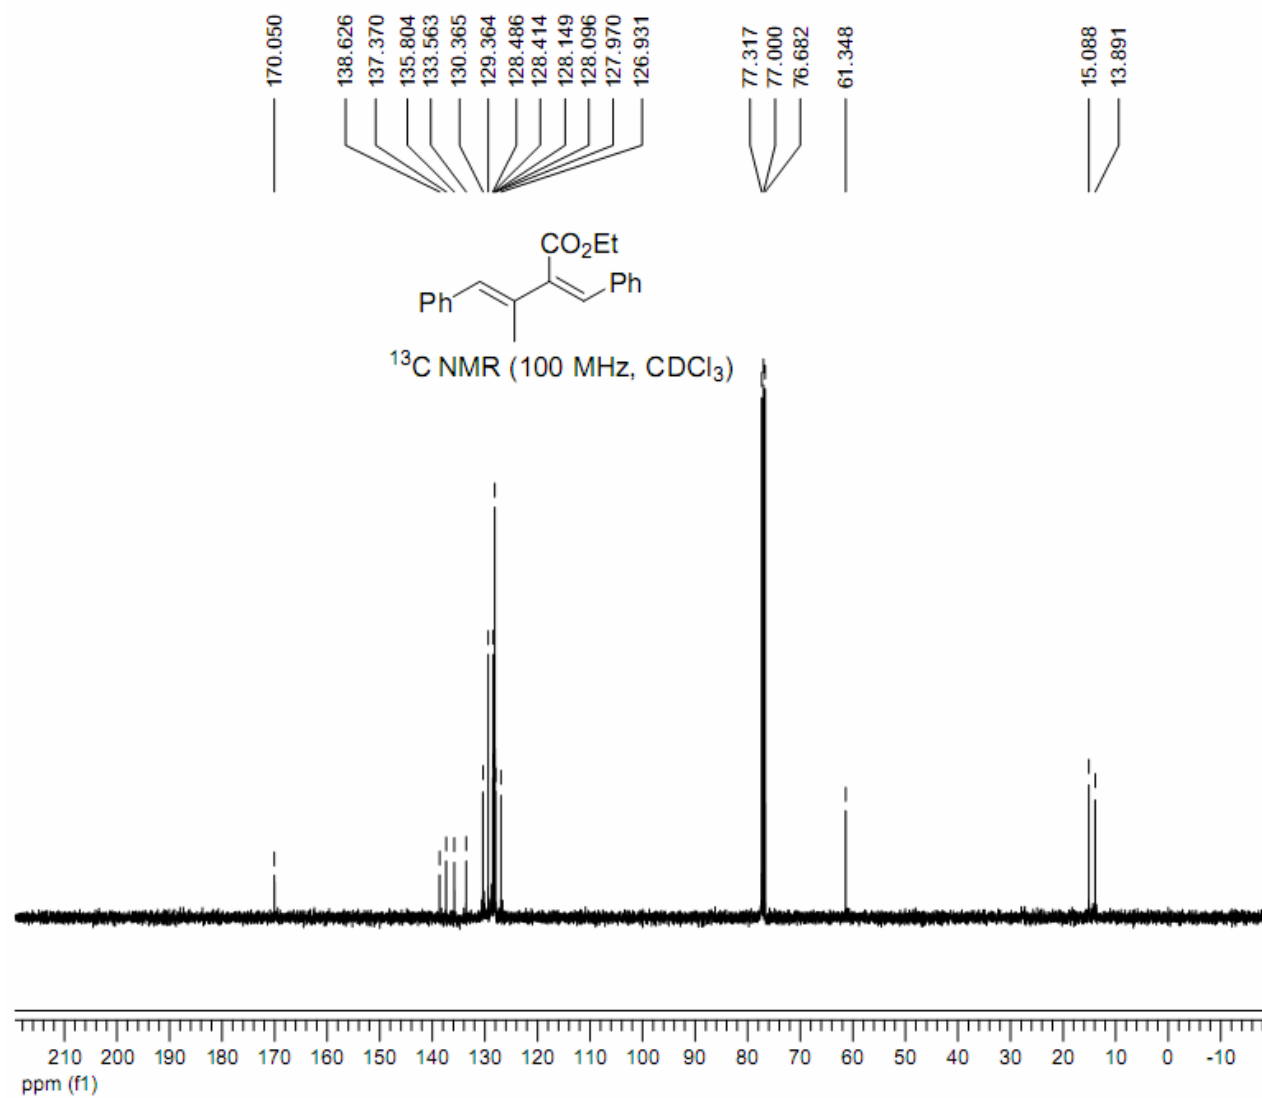

**Date:**  
 16 Jun 2010  
**Document's Title:**  
 a-Ph-allene-Ph-C.mrc  
**Spectrum Title:**  
 C13CPD  
**Frequency (MHz):**  
 (f1) 100.623  
**Original Points Count:**  
 (f1) 9614  
**Actual Points Count:**  
 (f1) 32768  
**Acquisition Time (sec):**  
 (f1) 0.3999  
**Spectral Width (ppm):**  
 (f1) 238.897  
**Pulse Program:**  
 ZGPG30  
**Temperature:**  
 285.66  
**Number of Scans:**  
 224  
**Acq. Date:**  
 Sun Dec 27 09:02:25 PM

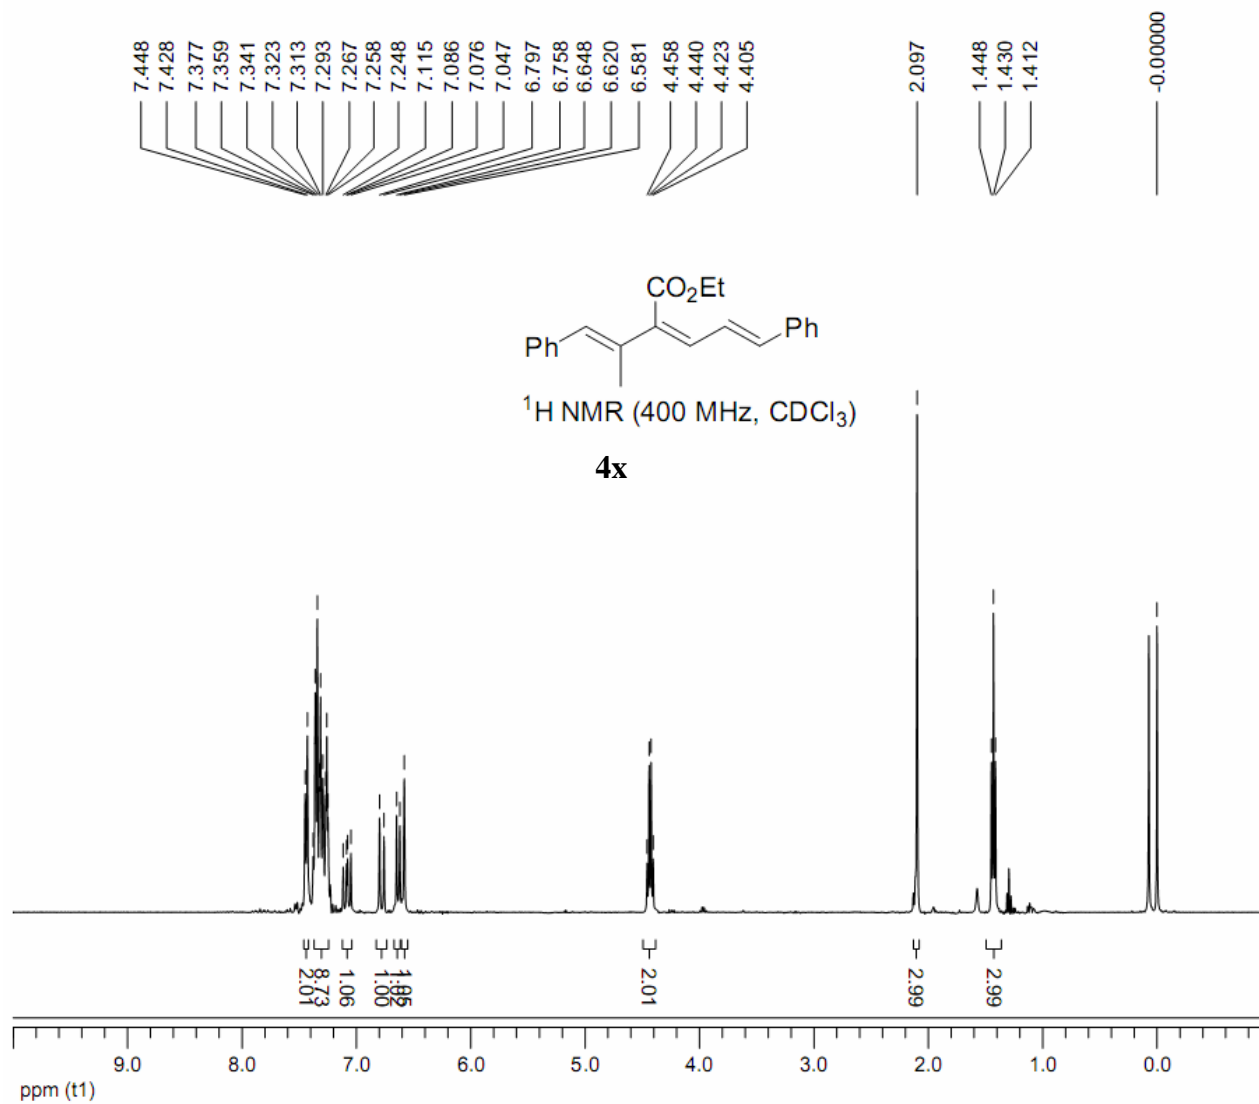

**Date:**  
16 Jun 2010  
**Document's Title:**  
a-PhCH=CH-allene-Ph-H

**Spectrum Title:**  
PROTON

**Frequency (MHz):**  
(f1) 400.130  
**Original Points Count:**  
(f1) 32768  
**Actual Points Count:**  
(f1) 32768  
**Acquisition Time (sec):**  
(f1) 3.9846  
**Spectral Width (ppm):**  
(f1) 20.553  
**Pulse Program:**  
Unknown

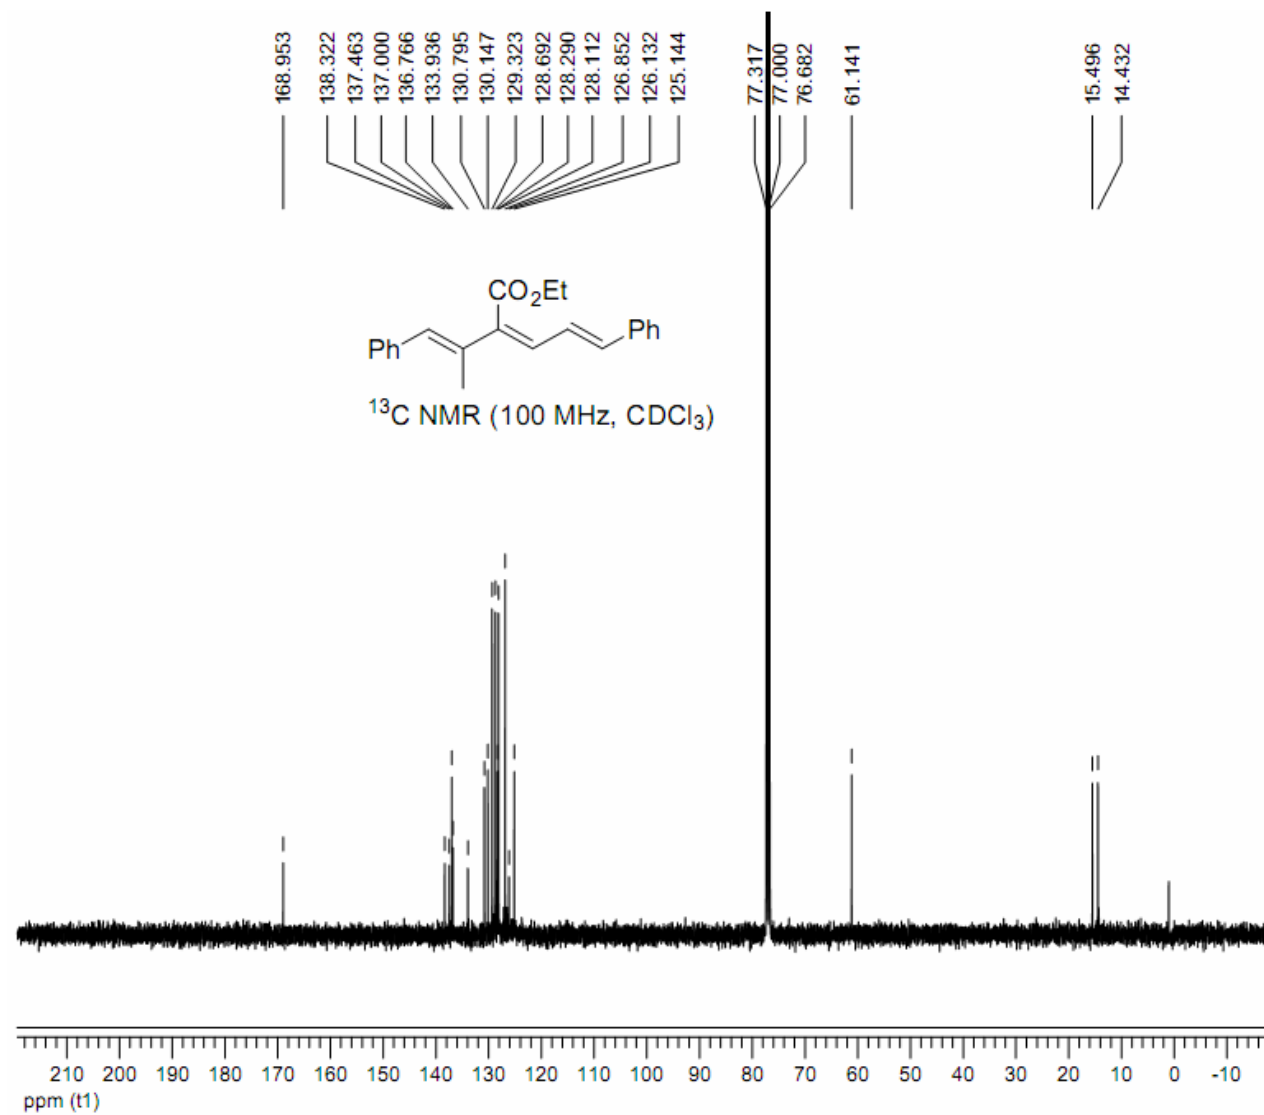

**Date:**  
 16 Jun 2010  
**Document's Title:**  
 α-PhCH=CH-allene-Ph-C  
**Spectrum Title:**  
 C13CPD  
**Frequency (MHz):**  
 (f1) 100.613  
**Original Points Count:**  
 (f1) 32768  
**Actual Points Count:**  
 (f1) 32768  
**Acquisition Time (sec):**  
 (f1) 1.3631  
**Spectral Width (ppm):**  
 (f1) 238.920  
**Pulse Program:**  
 Unknown

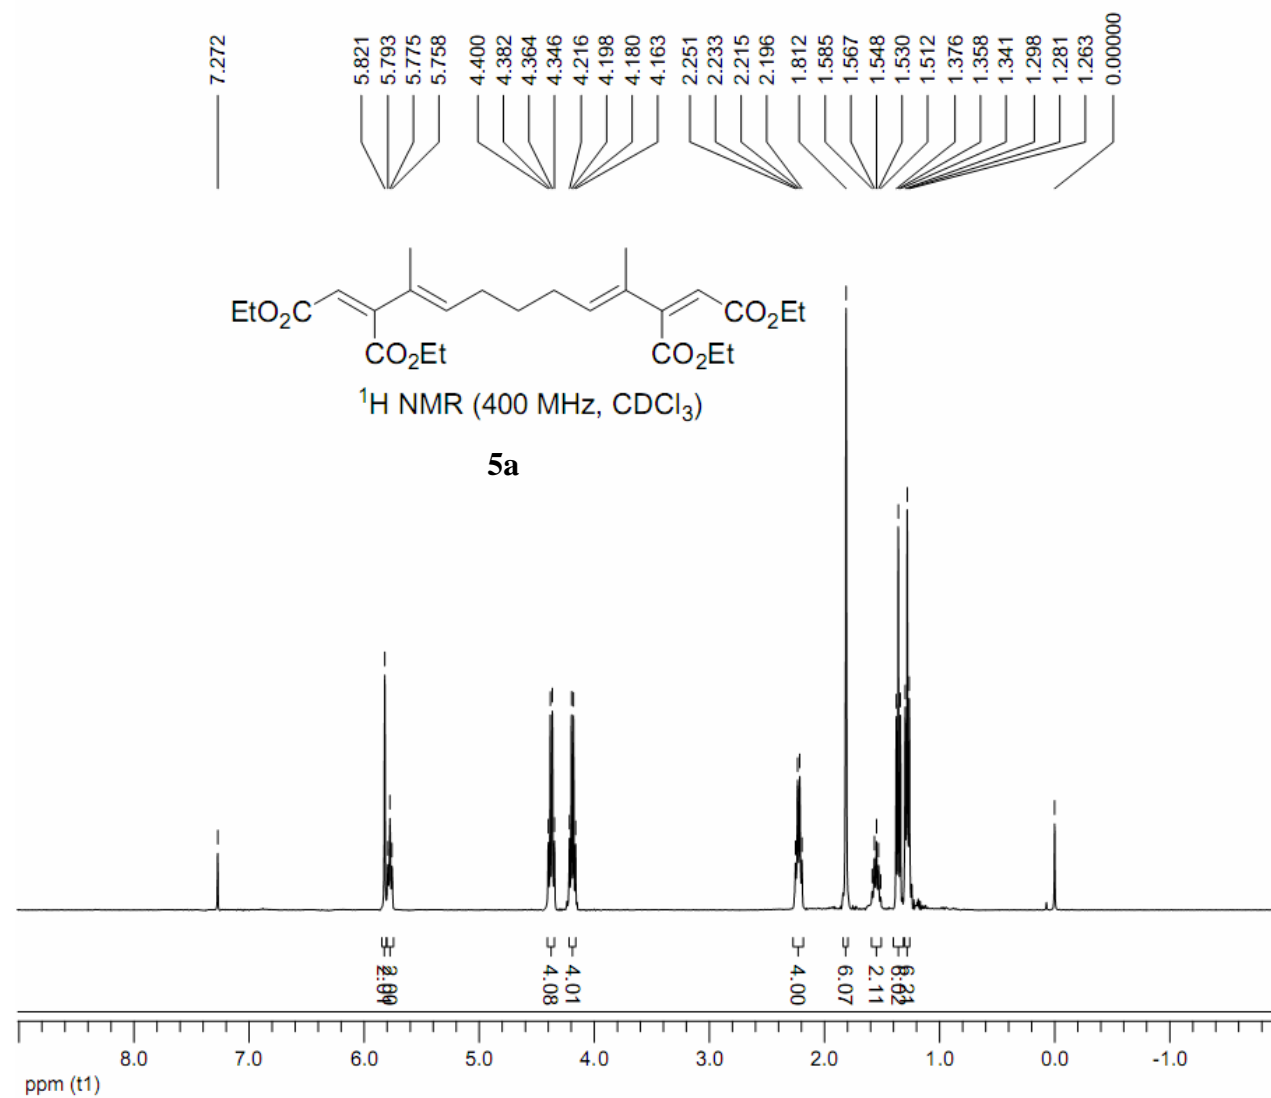

**Date:**  
16 Jun 2010  
**Document's Title:**  
di-CH<sub>2</sub>CH<sub>2</sub>CH<sub>2</sub>-H.mrc

**Spectrum Title:**  
PROTON

**Frequency (MHz):**  
(f1) 400.130  
**Original Points Count:**  
(f1) 32768  
**Actual Points Count:**  
(f1) 32768  
**Acquisition Time (sec):**  
(f1) 3.9846  
**Spectral Width (ppm):**  
(f1) 20.553  
**Pulse Program:**  
Unknown



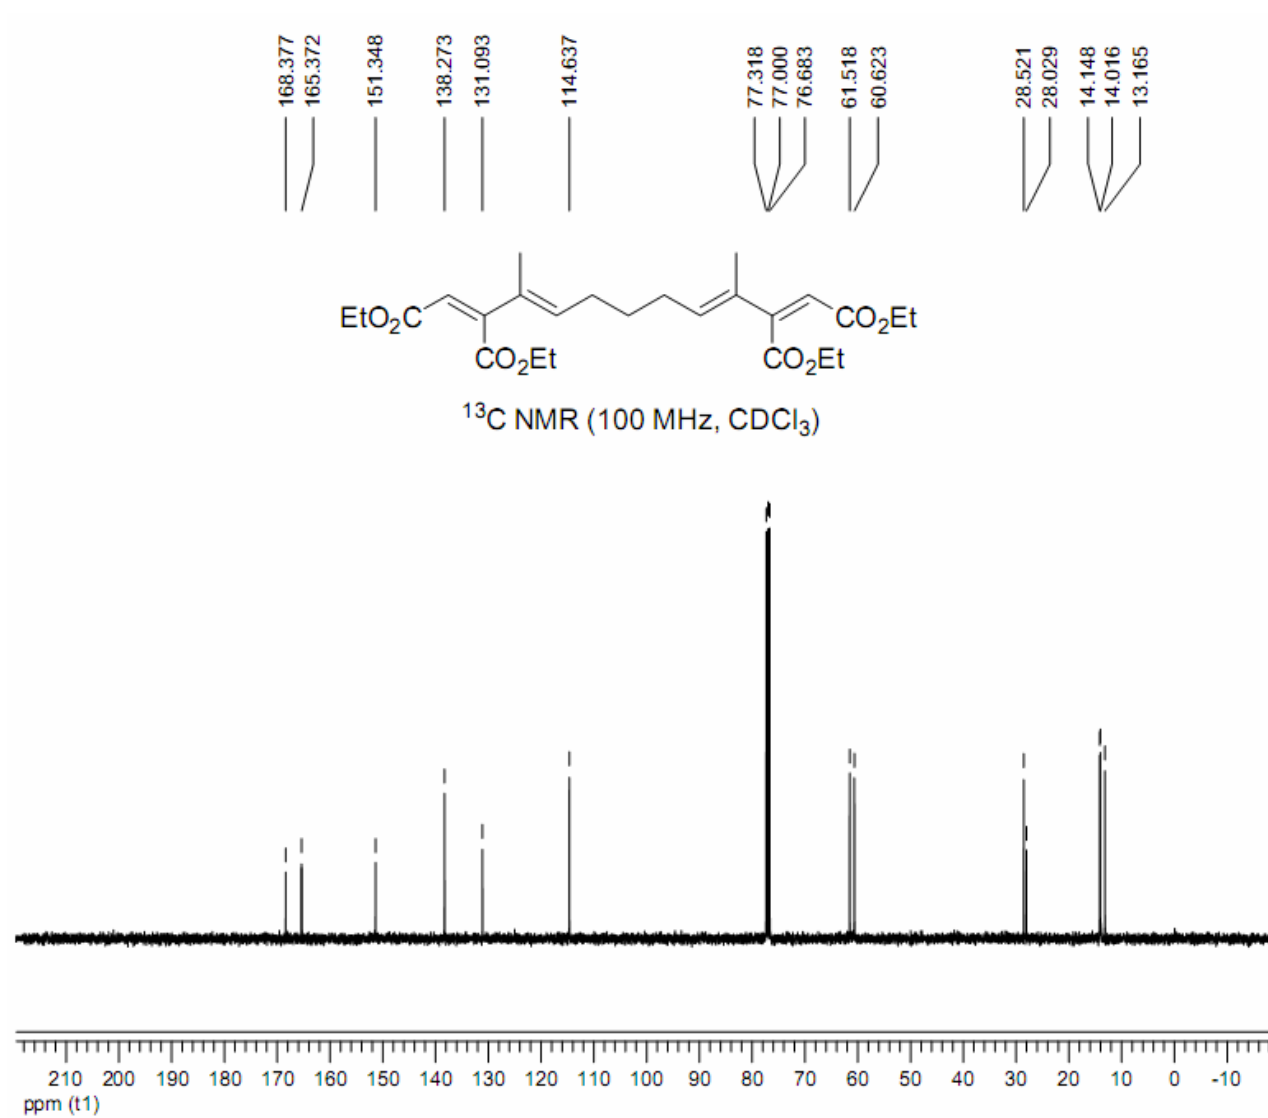

**Date:**  
16 Jun 2010  
**Document's Title:**  
di-CH<sub>2</sub>CH<sub>2</sub>CH<sub>2</sub>-C.mrc

**Spectrum Title:**  
C13CPD

**Frequency (MHz):**  
(f1) 100.613  
**Original Points Count:**  
(f1) 32768  
**Actual Points Count:**  
(f1) 32768  
**Acquisition Time (sec):**  
(f1) 1.3631  
**Spectral Width (ppm):**  
(f1) 238.921  
**Pulse Program:**  
Unknown

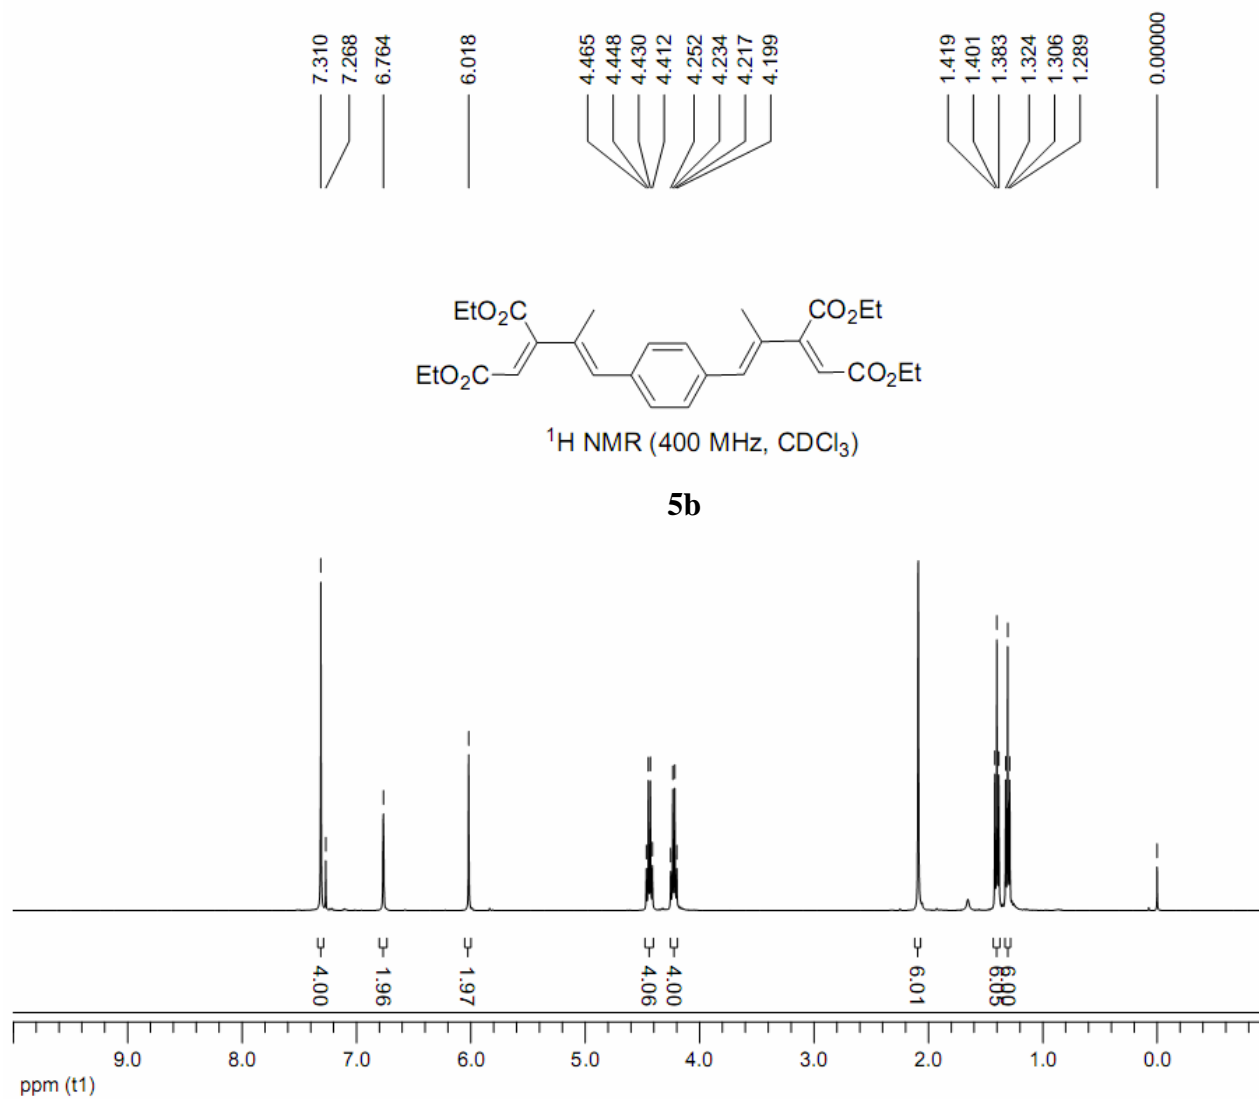

**Date:**  
 16 Jun 2010  
**Document's Title:**  
 di-C6H4-H.mrc  
**Spectrum Title:**  
 PROTON  
**Frequency (MHz):**  
 (f1) 400.130  
**Original Points Count:**  
 (f1) 32768  
**Actual Points Count:**  
 (f1) 32768  
**Acquisition Time (sec):**  
 (f1) 3.9846  
**Spectral Width (ppm):**  
 (f1) 20.553  
**Pulse Program:**  
 Unknown

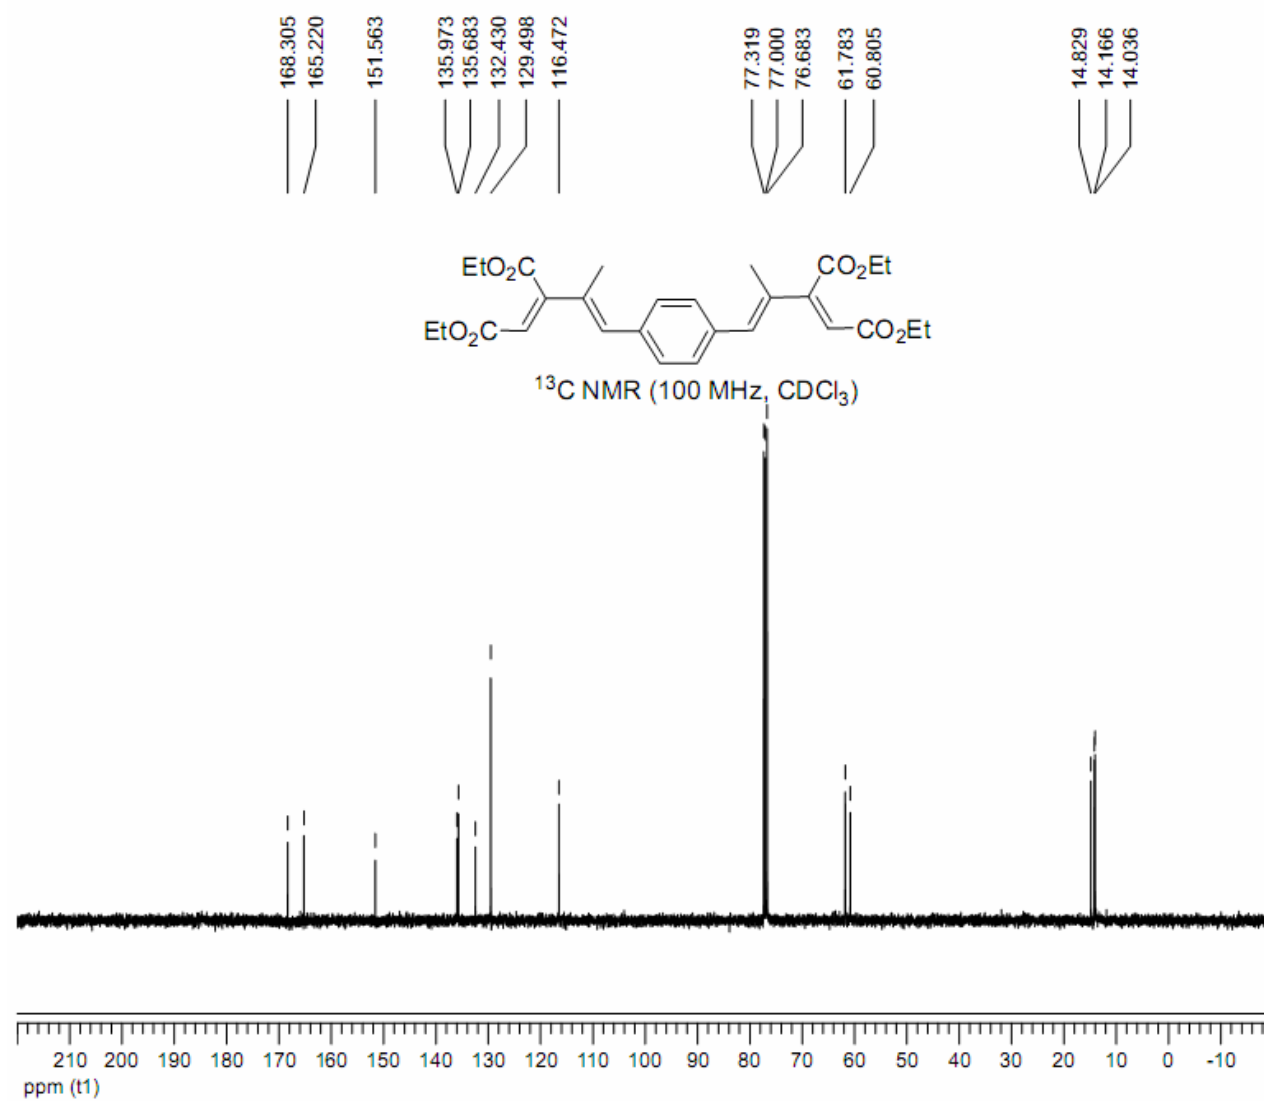

**Date:**  
18 Jun 2010

**Document's Title:**  
di-C6H4-C.mrc

**Spectrum Title:**  
C13CPD

**Frequency (MHz):**  
(f1) 100.613

**Original Points Count:**  
(f1) 32768

**Actual Points Count:**  
(f1) 32768

**Acquisition Time (sec):**  
(f1) 0.9175

**Spectral Width (ppm):**  
(f1) 354.968

**Pulse Program:**  
Unknown

## VIII. NOESY Spectrum of 4a

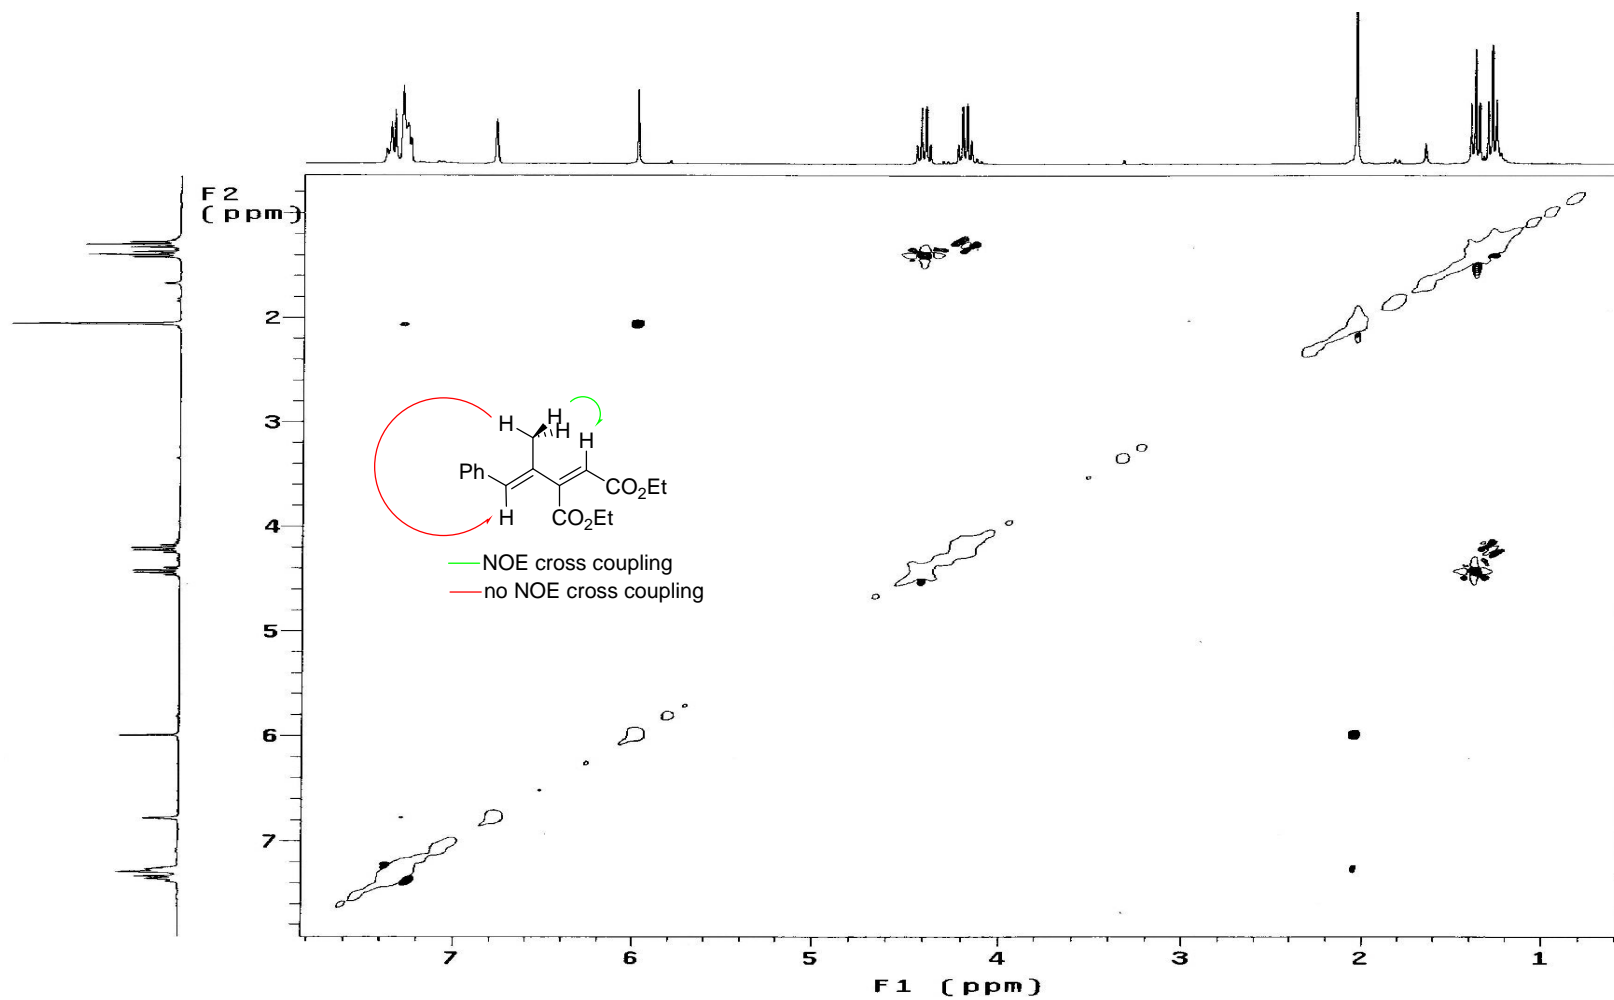

Supplement: Supplementary file 1 [file 4424155]
